# Supplementary material
Source: publisher figshare collection journal article supplement (https://acs.figshare.com/ndownloader/files/3865468)
Supplement: Supplementary file 1 [file 3865468]

data_3-Nd2Cu
_audit_creation_date              2014-08-23
_audit_creation_method
;
Olex2 1.2
(compiled 2014.03.20 svn.r2914 for OlexSys, GUI svn.r4816)
;
_publ_contact_author_address      ?
_publ_contact_author_email        ?
_publ_contact_author_name         ''
_publ_contact_author_phone        ?
_publ_section_references
;
Dolomanov, O.V., Bourhis, L.J., Gildea, R.J, Howard, J.A.K. & Puschmann, H.
 (2009), J. Appl. Cryst. 42, 339-341.

Sheldrick, G.M. (2008). Acta Cryst. A64, 112-122.
;
_chemical_name_common             ?
_chemical_name_systematic
;
 ? 
;
_chemical_formula_moiety          'C48 H38 Cu N8 Nd2 O22, 3(O)'
_chemical_formula_sum             'C48 H38 Cu N8 Nd2 O25'
_chemical_formula_weight          1478.90
_chemical_melting_point           ?
_chemical_oxdiff_formula          C12Cu1Nd1
_chemical_oxdiff_usercomment      c24-120412-1
loop_
  _atom_type_symbol
  _atom_type_description
  _atom_type_scat_dispersion_real
  _atom_type_scat_dispersion_imag
  _atom_type_scat_source
 'C' 'C' 0.0033 0.0016 'International Tables Vol C Tables 4.2.6.8 and 6.1.1.4'
 'H' 'H' 0.0000 0.0000 'International Tables Vol C Tables 4.2.6.8 and 6.1.1.4'
 'Cu' 'Cu' 0.3201 1.2651 'International Tables Vol C Tables 4.2.6.8 and 6.1.1.4'
 'N' 'N' 0.0061 0.0033 'International Tables Vol C Tables 4.2.6.8 and 6.1.1.4'
 'Nd' 'Nd' -0.1943 3.0179
 'International Tables Vol C Tables 4.2.6.8 and 6.1.1.4'
 'O' 'O' 0.0106 0.0060 'International Tables Vol C Tables 4.2.6.8 and 6.1.1.4'

_symmetry_cell_setting       'tetragonal'
_space_group_IT_number            88
_space_group_name_H-M_alt         'I 41/a'
_space_group_name_Hall            '-I 4ad'
loop_
  _space_group_symop_id
  _space_group_symop_operation_xyz
 1 'x, y, z'
 2 '-y+3/4, x+1/4, z+1/4'
 3 '-x, -y+1/2, z'
 4 'y+1/4, -x+1/4, z+1/4'
 5 'x+1/2, y+1/2, z+1/2'
 6 '-y+5/4, x+3/4, z+3/4'
 7 '-x+1/2, -y+1, z+1/2'
 8 'y+3/4, -x+3/4, z+3/4'
 9 '-x, -y, -z'
 10 'y-3/4, -x-1/4, -z-1/4'
 11 'x, y-1/2, -z'
 12 '-y-1/4, x-1/4, -z-1/4'
 13 '-x+1/2, -y+1/2, -z+1/2'
 14 'y-1/4, -x+1/4, -z+1/4'
 15 'x+1/2, y, -z+1/2'
 16 '-y+1/4, x+1/4, -z+1/4'

_cell_length_a                    45.3447(7)
_cell_length_b                    45.3447(7)
_cell_length_c                    11.2994(3)
_cell_angle_alpha                 90.00
_cell_angle_beta                  90.00
_cell_angle_gamma                 90.00
_cell_volume                      23233.2(7)
_cell_formula_units_Z             16
_cell_measurement_reflns_used     7702
_cell_measurement_temperature     122.8(5)
_cell_measurement_theta_max       28.9640
_cell_measurement_theta_min       2.4183
_exptl_absorpt_coefficient_mu     2.212
_exptl_absorpt_correction_T_max   1.00000
_exptl_absorpt_correction_T_min   0.51557
_exptl_absorpt_correction_type    multi-scan
_exptl_absorpt_process_details
;
CrysAlisPro, Agilent Technologies,
Version 1.171.35.19 (release 27-10-2011 CrysAlis171 .NET)
(compiled Oct 27 2011,15:02:11)
Empirical absorption correction using spherical harmonics,
 implemented in SCALE3 ABSPACK scaling algorithm.
;
_exptl_crystal_description        needle
_exptl_crystal_colour             green
_exptl_crystal_density_diffrn     1.691
_exptl_crystal_density_meas       ?
_exptl_crystal_density_method     'not measured'
_exptl_crystal_F_000              11696
_exptl_crystal_size_max           0.2
_exptl_crystal_size_mid           0.1
_exptl_crystal_size_min           0.1
_exptl_special_details
;
 ? 
;
_diffrn_reflns_av_R_equivalents   0.0400
_diffrn_reflns_av_unetI/netI      0.0617
_diffrn_reflns_limit_h_max        27
_diffrn_reflns_limit_h_min        -53
_diffrn_reflns_limit_k_max        53
_diffrn_reflns_limit_k_min        -32
_diffrn_reflns_limit_l_max        13
_diffrn_reflns_limit_l_min        -12
_diffrn_reflns_number             22069
_diffrn_reflns_theta_full         25.01
_diffrn_reflns_theta_max          25.01
_diffrn_reflns_theta_min          2.42
_diffrn_ambient_temperature       122.8(5)
_diffrn_detector_area_resol_mean  16.2116
_diffrn_measured_fraction_theta_full 0.999
_diffrn_measured_fraction_theta_max 0.999
_diffrn_measurement_details
;
#__ type_ start__ end____ width___ exp.time_
  1 omega  -15.00   11.25   0.7500   80.0000
omega____ theta____ kappa____ phi______ frames
    -       18.5573   89.0000   24.0000 35

#__ type_ start__ end____ width___ exp.time_
  2 omega  -37.00   49.25   0.7500   80.0000
omega____ theta____ kappa____ phi______ frames
    -       18.5573    0.0000  -30.0000 115
;
_diffrn_measurement_device_type   'SuperNova, Single source at offset), Eos'
_diffrn_measurement_method        '\w scans'
_diffrn_orient_matrix_UB_11       -0.0117122000
_diffrn_orient_matrix_UB_12       -0.0062154000
_diffrn_orient_matrix_UB_13       -0.0332876000
_diffrn_orient_matrix_UB_21       -0.0079184000
_diffrn_orient_matrix_UB_22       0.0134439000
_diffrn_orient_matrix_UB_23       0.0044288000
_diffrn_orient_matrix_UB_31       0.0066947000
_diffrn_orient_matrix_UB_32       0.0050203000
_diffrn_orient_matrix_UB_33       -0.0530513000
_diffrn_radiation_monochromator   mirror
_diffrn_radiation_type            MoK\a
_diffrn_radiation_wavelength      0.71073
_diffrn_source                    'SuperNova (Mo) X-ray Source'
_diffrn_standards_decay_%         ?
_diffrn_standards_interval_count  ?
_diffrn_standards_interval_time   ?
_diffrn_standards_number          ?
_reflns_number_gt                 7309
_reflns_number_total              10243
_reflns_odcompleteness_completeness 99.78
_reflns_odcompleteness_iscentric  1
_reflns_odcompleteness_theta      26.32
_reflns_threshold_expression      >2sigma(I)
_computing_cell_refinement
;
CrysAlisPro, Agilent Technologies,
Version 1.171.35.19 (release 27-10-2011 CrysAlis171 .NET)
(compiled Oct 27 2011,15:02:11)
;
_computing_data_collection
;
CrysAlisPro, Agilent Technologies,
Version 1.171.35.19 (release 27-10-2011 CrysAlis171 .NET)
(compiled Oct 27 2011,15:02:11)
;
_computing_data_reduction
;
CrysAlisPro, Agilent Technologies,
Version 1.171.35.19 (release 27-10-2011 CrysAlis171 .NET)
(compiled Oct 27 2011,15:02:11)
;
_computing_molecular_graphics     'Olex2 (Dolomanov et al., 2009)'
_computing_publication_material   'Olex2 (Dolomanov et al., 2009)'
_computing_structure_refinement   'XL (Sheldrick, 2008)'
_computing_structure_solution     'XS (Sheldrick, 2008)'
_refine_diff_density_max          0.623
_refine_diff_density_min          -0.985
_refine_diff_density_rms          0.116
_refine_ls_extinction_coef        ?
_refine_ls_extinction_method      none
_refine_ls_goodness_of_fit_ref    1.025
_refine_ls_hydrogen_treatment     constr
_refine_ls_matrix_type            full
_refine_ls_number_parameters      766
_refine_ls_number_reflns          10243
_refine_ls_number_restraints      210
_refine_ls_R_factor_all           0.0621
_refine_ls_R_factor_gt            0.0391
_refine_ls_restrained_S_all       1.017
_refine_ls_shift/su_max           0.003
_refine_ls_shift/su_mean          0.000
_refine_ls_structure_factor_coef  Fsqd
_refine_ls_weighting_details
'calc w=1/[\s^2^(Fo^2^)+(0.0695P)^2^+827.2438P] where P=(Fo^2^+2Fc^2^)/3'
_refine_ls_weighting_scheme       calc
_refine_ls_wR_factor_gt           0.0825
_refine_ls_wR_factor_ref          0.0892
_refine_special_details
;
 Refinement of F^2^ against ALL reflections.  The weighted R-factor wR and 
 goodness of fit S are based on F^2^, conventional R-factors R are based 
 on F, with F set to zero for negative F^2^. The threshold expression of 
 F^2^ > 2sigma(F^2^) is used only for calculating R-factors(gt) etc. and is 
 not relevant to the choice of reflections for refinement.  R-factors based 
 on F^2^ are statistically about twice as large as those based on F, and R- 
 factors based on ALL data will be even larger. 
;
_olex2_refinement_description
;
1. Fixed Uiso
 At 1.2 times of:
  All C(H) groups
 At 1.5 times of:
  All O(H,H) groups
2. Uiso/Uaniso restraints and constraints
 C8 \\sim N2 \\sim C7 \\sim C11 \\sim C10 \\sim C9 \\sim N1 \\sim C6 \\sim C2
\\sim C3 \\sim C4 \\sim C5: within 1.7A with sigma of 0.005 and sigma for
terminal atoms of 0.01
Uanis(C26) \\sim Ueq, Uanis(C35) \\sim Ueq, Uanis(C31) \\sim Ueq, Uanis(C30)
\\sim Ueq, Uanis(C19) \\sim Ueq, Uanis(C14) \\sim Ueq, Uanis(C18) \\sim Ueq,
Uanis(C38) \\sim Ueq, Uanis(C42) \\sim Ueq, Uanis(C40) \\sim Ueq, Uanis(C47)
\\sim Ueq, Uanis(C12) \\sim Ueq: with sigma of 0.001 and sigma for terminal
atoms of 0.002
Uanis(C37) \\sim Ueq: with sigma of 0.001 and sigma for terminal atoms of 0.002
Uanis(O17) \\sim Ueq: with sigma of 0.001 and sigma for terminal atoms of 0.002
Uanis(C21) \\sim Ueq, Uanis(C20) \\sim Ueq: with sigma of 0.001 and sigma for
terminal atoms of 0.002
Uanis(C13) \\sim Ueq: with sigma of 0.001 and sigma for terminal atoms of 0.002
Uanis(C43) \\sim Ueq: with sigma of 0.0001 and sigma for terminal atoms of
0.0002
Uanis(N3) \\sim Ueq: with sigma of 0.0001 and sigma for terminal atoms of 0.0002
3.a Rotating group:
 O17(H17a,H17b), O18(H18a,H18b), O19(H19a,H19b), O20(H20a,H20b), O21(H21a,
 H21b), O22(H22a,H22b)
3.b Aromatic/amide H refined with riding coordinates:
 C3(H3), C4(H4), C5(H5), C8(H8), C9(H9), C10(H10), C15(H15), C16(H16),
 C17(H17), C20(H20), C21(H21), C22(H22), C27(H27), C28(H28), C29(H29), C32(H32),
  C33(H33), C34(H34), C39(H39), C40(H40), C41(H41), C44(H44), C45(H45), C46(H46)
;
_atom_sites_solution_hydrogens    geom
_atom_sites_solution_primary      direct
_atom_sites_solution_secondary    difmap 
loop_
  _platon_squeeze_void_nr
  _platon_squeeze_void_average_x
  _platon_squeeze_void_average_y
  _platon_squeeze_void_average_z
  _platon_squeeze_void_volume
  _platon_squeeze_void_count_electrons
  _platon_squeeze_void_content
   1  0.000  0.250  0.271       921       205 ' '
   2  0.000  0.750  0.705       921       206 ' '
   3  0.180  0.480  0.958        10         1 ' '
   4  0.180  0.980  0.042        10         1 ' '
   5  0.230  0.070  0.292        10         1 ' '
   6  0.230  0.570  0.708        10         1 ' '
   7  0.270  0.430  0.208        10         1 ' '
   8  0.270  0.930  0.792        10         1 ' '
   9  0.320  0.020  0.542        10         1 ' '
  10  0.320  0.520  0.458        10         1 ' '
  11  0.500  0.250  0.582       921       206 ' '
  12  0.500  0.750  0.412       921       205 ' '
  13  0.680  0.480  0.542        10         1 ' '
  14  0.680  0.980  0.458        10         1 ' '
  15  0.730  0.070  0.208        10         1 ' '
  16  0.730  0.570  0.792        10         1 ' '
  17  0.770  0.430  0.292        10         1 ' '
  18  0.770  0.930  0.708        10         1 ' '
  19  0.820  0.020  0.958        10         1 ' '
  20  0.820  0.520  0.042        10         1 ' '
_platon_squeeze_details
;
;
loop_ 
 _atom_site_label 
 _atom_site_type_symbol 
 _atom_site_fract_x 
 _atom_site_fract_y 
 _atom_site_fract_z 
 _atom_site_U_iso_or_equiv 
 _atom_site_adp_type 
 _atom_site_occupancy 
 _atom_site_symmetry_multiplicity 
 _atom_site_calc_flag 
 _atom_site_refinement_flags 
 _atom_site_disorder_assembly 
 _atom_site_disorder_group 
C1 C 0.79159(11) 0.89738(11) 0.2861(4) 0.0105(11) Uani 1 1 d . . . 
C2 C 0.77542(11) 0.91910(11) 0.3636(4) 0.0105(10) Uani 1 1 d U . . 
C3 C 0.74551(11) 0.91442(11) 0.3867(4) 0.0122(10) Uani 1 1 d U . . 
H3 H 0.7364 0.8972 0.3614 0.015 Uiso 1 1 calc R . . 
C4 C 0.72956(11) 0.93557(11) 0.4475(4) 0.0141(11) Uani 1 1 d U . . 
H4 H 0.7098 0.9325 0.4665 0.017 Uiso 1 1 calc R . . 
C5 C 0.74364(11) 0.96131(11) 0.4790(4) 0.0147(11) Uani 1 1 d U . . 
H5 H 0.7325 0.9762 0.5138 0.018 Uiso 1 1 calc R . . 
C6 C 0.78836(11) 0.94480(11) 0.4089(4) 0.0120(10) Uani 1 1 d U . . 
C7 C 0.82060(11) 0.95015(11) 0.4046(4) 0.0115(10) Uani 1 1 d U . . 
C8 C 0.85758(11) 0.98191(11) 0.3510(4) 0.0128(10) Uani 1 1 d U . . 
H8 H 0.8635 0.9994 0.3152 0.015 Uiso 1 1 calc R . . 
C9 C 0.87935(12) 0.96434(11) 0.4017(4) 0.0130(10) Uani 1 1 d U . . 
H9 H 0.8990 0.9701 0.4012 0.016 Uiso 1 1 calc R . . 
C10 C 0.87069(11) 0.93817(11) 0.4526(4) 0.0114(10) Uani 1 1 d U . . 
H10 H 0.8846 0.9253 0.4839 0.014 Uiso 1 1 calc R . . 
C11 C 0.84089(11) 0.93111(11) 0.4567(4) 0.0083(10) Uani 1 1 d U . . 
C12 C 0.83173(11) 0.90345(11) 0.5191(4) 0.0088(11) Uani 1 1 d U . . 
C13 C 0.86140(11) 0.87411(10) -0.0961(4) 0.0078(11) Uani 1 1 d U . . 
C14 C 0.88836(11) 0.89242(11) -0.1223(4) 0.0080(11) Uani 1 1 d U . . 
C15 C 0.88655(11) 0.91463(11) -0.2076(4) 0.0154(12) Uani 1 1 d . . . 
H15 H 0.8698 0.9164 -0.2544 0.019 Uiso 1 1 calc R . . 
C16 C 0.90970(12) 0.93382(12) -0.2218(4) 0.0184(13) Uani 1 1 d . . . 
H16 H 0.9090 0.9484 -0.2795 0.022 Uiso 1 1 calc R . . 
C17 C 0.93384(11) 0.93104(12) -0.1495(4) 0.0167(12) Uani 1 1 d . . . 
H17 H 0.9489 0.9449 -0.1561 0.020 Uiso 1 1 calc R . . 
C18 C 0.91485(10) 0.88987(10) -0.0585(4) 0.0083(11) Uani 1 1 d U . . 
C19 C 0.92121(10) 0.86603(10) 0.0289(4) 0.0066(11) Uani 1 1 d U . . 
C20 C 0.94084(11) 0.85632(11) 0.2173(4) 0.0121(12) Uani 1 1 d U . . 
H20 H 0.9489 0.8632 0.2877 0.014 Uiso 1 1 calc R . . 
C21 C 0.93616(11) 0.82676(11) 0.2031(4) 0.0135(12) Uani 1 1 d U . . 
H21 H 0.9413 0.8137 0.2630 0.016 Uiso 1 1 calc R . . 
C22 C 0.92379(10) 0.81641(11) 0.0994(4) 0.0115(12) Uani 1 1 d . . . 
H22 H 0.9206 0.7963 0.0887 0.014 Uiso 1 1 calc R . . 
C23 C 0.91619(10) 0.83626(11) 0.0115(4) 0.0104(11) Uani 1 1 d . . . 
C24 C 0.90268(11) 0.82424(11) -0.1027(4) 0.0125(12) Uani 1 1 d . . . 
C25 C 1.04551(11) 0.86606(11) 0.3554(4) 0.0120(11) Uani 1 1 d U . . 
C26 C 1.02757(11) 0.86879(10) 0.2425(4) 0.0085(11) Uani 1 1 d U . . 
C27 C 1.03110(11) 0.84837(11) 0.1528(4) 0.0110(11) Uani 1 1 d . . . 
H27 H 1.0441 0.8327 0.1625 0.013 Uiso 1 1 calc R . . 
C28 C 1.01538(10) 0.85118(11) 0.0492(4) 0.0107(11) Uani 1 1 d . . . 
H28 H 1.0178 0.8376 -0.0118 0.013 Uiso 1 1 calc R . . 
C29 C 0.99619(11) 0.87412(11) 0.0373(4) 0.0121(12) Uani 1 1 d . . . 
H29 H 0.9858 0.8761 -0.0333 0.014 Uiso 1 1 calc R . . 
C30 C 1.00765(10) 0.89190(10) 0.2258(4) 0.0073(11) Uani 1 1 d U . . 
C31 C 0.99975(10) 0.91436(10) 0.3167(4) 0.0080(11) Uani 1 1 d U . . 
C32 C 0.96096(12) 0.93651(12) 0.4117(4) 0.0182(13) Uani 1 1 d . . . 
H32 H 0.9407 0.9389 0.4204 0.022 Uiso 1 1 calc R . . 
C33 C 0.97926(12) 0.95261(12) 0.4834(4) 0.0187(13) Uani 1 1 d . . . 
H33 H 0.9716 0.9648 0.5422 0.022 Uiso 1 1 calc R . . 
C34 C 1.00916(12) 0.95031(11) 0.4663(4) 0.0155(12) Uani 1 1 d . . . 
H34 H 1.0221 0.9614 0.5125 0.019 Uiso 1 1 calc R . . 
C35 C 1.02010(11) 0.93151(11) 0.3801(4) 0.0078(11) Uani 1 1 d U . . 
C36 C 1.05284(11) 0.93176(11) 0.3529(4) 0.0092(11) Uani 1 1 d . . . 
C37 C 0.93659(11) 1.02608(11) 0.2552(4) 0.0077(11) Uani 1 1 d U . . 
C38 C 0.95837(10) 1.00591(10) 0.1936(4) 0.0064(10) Uani 1 1 d U . . 
C39 C 0.98830(10) 1.01291(11) 0.1933(4) 0.0112(11) Uani 1 1 d . . . 
H39 H 0.9945 1.0312 0.2210 0.013 Uiso 1 1 calc R . . 
C40 C 1.00892(12) 0.99277(11) 0.1520(4) 0.0132(12) Uani 1 1 d U . . 
H40 H 1.0288 0.9979 0.1475 0.016 Uiso 1 1 calc R . . 
C41 C 0.99958(11) 0.96506(11) 0.1176(4) 0.0121(12) Uani 1 1 d . . . 
H41 H 1.0134 0.9511 0.0946 0.014 Uiso 1 1 calc R . . 
C42 C 0.95022(10) 0.97850(10) 0.1467(4) 0.0068(11) Uani 1 1 d U . . 
C43 C 0.91968(10) 0.96827(11) 0.1268(4) 0.0073(11) Uani 1 1 d U . . 
C44 C 0.88867(11) 0.92754(11) 0.1460(4) 0.0114(12) Uani 1 1 d . . . 
H44 H 0.8860 0.9079 0.1672 0.014 Uiso 1 1 calc R . . 
C45 C 0.86443(11) 0.94372(11) 0.1076(4) 0.0109(11) Uani 1 1 d . . . 
H45 H 0.8457 0.9354 0.1061 0.013 Uiso 1 1 calc R . . 
C46 C 0.86912(11) 0.97269(11) 0.0716(4) 0.0103(11) Uani 1 1 d . . . 
H46 H 0.8535 0.9837 0.0418 0.012 Uiso 1 1 calc R . . 
C47 C 0.89701(10) 0.98517(10) 0.0801(4) 0.0068(11) Uani 1 1 d U . . 
C48 C 0.90185(11) 1.01480(11) 0.0232(4) 0.0095(11) Uani 1 1 d . . . 
N1 N 0.77227(9) 0.96607(9) 0.4625(3) 0.0153(9) Uani 1 1 d U . . 
N2 N 0.82887(10) 0.97540(9) 0.3501(3) 0.0134(9) Uani 1 1 d U . . 
N3 N 0.93390(9) 0.87581(9) 0.1308(3) 0.0086(9) Uani 1 1 d U . . 
N4 N 0.93691(9) 0.90933(9) -0.0697(3) 0.0122(10) Uani 1 1 d . . . 
N5 N 0.99174(9) 0.89406(9) 0.1245(3) 0.0089(9) Uani 1 1 d . . . 
N6 N 0.97076(9) 0.91754(9) 0.3297(3) 0.0111(10) Uani 1 1 d . . . 
N7 N 0.97094(9) 0.95798(9) 0.1167(3) 0.0089(9) Uani 1 1 d U . . 
N8 N 0.91588(9) 0.93933(9) 0.1537(3) 0.0079(9) Uani 1 1 d . . . 
O1 O 0.78097(7) 0.87147(7) 0.2810(3) 0.0098(8) Uani 1 1 d . . . 
O2 O 0.81338(8) 0.90494(7) 0.2265(3) 0.0140(8) Uani 1 1 d . . . 
O3 O 0.83737(8) 0.87898(7) 0.4710(3) 0.0148(8) Uani 1 1 d . . . 
O4 O 0.81977(8) 0.90524(8) 0.6187(3) 0.0178(9) Uani 1 1 d . . . 
O5 O 0.88196(7) 0.80608(7) -0.0902(3) 0.0116(8) Uani 1 1 d . . . 
O6 O 0.91277(7) 0.83376(7) -0.1987(3) 0.0144(8) Uani 1 1 d . . . 
O7 O 0.84417(7) 0.86837(7) -0.1792(3) 0.0103(8) Uani 1 1 d . . . 
O8 O 0.85786(7) 0.86700(7) 0.0111(3) 0.0106(8) Uani 1 1 d . . . 
O9 O 1.03197(7) 0.86913(8) 0.4515(3) 0.0162(9) Uani 1 1 d . . . 
O10 O 1.07227(7) 0.86018(7) 0.3431(3) 0.0107(8) Uani 1 1 d U . . 
O11 O 1.06000(7) 0.92774(7) 0.2473(3) 0.0129(8) Uani 1 1 d . . . 
O12 O 1.06987(7) 0.93746(7) 0.4373(3) 0.0124(8) Uani 1 1 d . . . 
O13 O 0.92470(8) 1.01689(8) 0.3475(3) 0.0168(8) Uani 1 1 d . . . 
O14 O 0.93265(8) 1.05157(7) 0.2163(3) 0.0152(8) Uani 1 1 d . . . 
O15 O 0.92572(7) 1.02168(7) -0.0215(3) 0.0119(8) Uani 1 1 d . . . 
O16 O 0.87910(7) 1.03153(7) 0.0185(3) 0.0125(8) Uani 1 1 d . . . 
O17 O 0.83332(7) 0.80454(7) -0.2308(3) 0.0106(8) Uani 1 1 d U . . 
H17A H 0.8295 0.7888 -0.2702 0.016 Uiso 1 1 d R . . 
H17B H 0.8230 0.8046 -0.1671 0.016 Uiso 1 1 d R . . 
O18 O 0.87477(7) 0.84520(8) -0.3801(3) 0.0146(8) Uani 1 1 d . . . 
H18A H 0.8788 0.8343 -0.4410 0.022 Uiso 1 1 d R . . 
H18B H 0.8829 0.8374 -0.3181 0.022 Uiso 1 1 d R . . 
O19 O 0.77625(8) 0.85774(8) -0.4849(3) 0.0168(9) Uani 1 1 d . . . 
H19A H 0.7668 0.8412 -0.4965 0.025 Uiso 1 1 d R . . 
H19B H 0.7816 0.8647 -0.5533 0.025 Uiso 1 1 d R . . 
O20 O 0.79676(7) 0.88575(7) -0.0019(3) 0.0114(8) Uani 1 1 d . . . 
H20A H 0.8010 0.8807 -0.0743 0.017 Uiso 1 1 d R . . 
H20B H 0.8036 0.9034 0.0107 0.017 Uiso 1 1 d R . . 
O21 O 0.85117(7) 0.80727(7) 0.1164(3) 0.0139(8) Uani 1 1 d . . . 
H21A H 0.8600 0.8030 0.1831 0.021 Uiso 1 1 d R . . 
H21B H 0.8647 0.8108 0.0630 0.021 Uiso 1 1 d R . . 
O22 O 0.86186(7) 0.86308(7) 0.2664(3) 0.0132(8) Uani 1 1 d . . . 
H22A H 0.8732 0.8469 0.2863 0.020 Uiso 1 1 d R . . 
H22B H 0.8565 0.8717 0.3371 0.020 Uiso 1 1 d R . . 
Cu1 Cu 0.953437(13) 0.916167(13) 0.13078(5) 0.00826(14) Uani 1 1 d . . . 
Nd1 Nd 0.818771(6) 0.850518(6) 0.14084(2) 0.00717(8) Uani 1 1 d . . . 
Nd2 Nd 0.821292(6) 0.848920(6) -0.35280(2) 0.00699(8) Uani 1 1 d . . . 
O24 O 0.79643(8) 0.94642(8) -0.0116(3) 0.0249(10) Uani 1 1 d . . . 
O25 O 0.78404(9) 0.98568(9) 0.1747(3) 0.0248(9) Uani 1 1 d G . . 
H25A H 0.7945 0.9874 0.2366 0.037 Uiso 1 1 d G . . 
H25B H 0.7688 0.9754 0.1903 0.037 Uiso 1 1 d G . . 
O23 O 0.74354(15) 0.81636(16) -0.6338(6) 0.116(3) Uani 1 1 d . . . 
 
loop_ 
 _atom_site_aniso_label 
 _atom_site_aniso_U_11 
 _atom_site_aniso_U_22 
 _atom_site_aniso_U_33 
 _atom_site_aniso_U_23 
 _atom_site_aniso_U_13 
 _atom_site_aniso_U_12 
C1 0.009(3) 0.017(3) 0.006(3) 0.001(2) -0.003(2) 0.005(2) 
C2 0.016(2) 0.009(2) 0.007(2) 0.0037(19) -0.0007(19) 0.004(2) 
C3 0.013(2) 0.015(2) 0.009(2) 0.0016(19) -0.003(2) 0.000(2) 
C4 0.012(2) 0.017(2) 0.013(2) 0.000(2) 0.000(2) 0.000(2) 
C5 0.015(2) 0.015(2) 0.014(2) 0.000(2) 0.002(2) 0.002(2) 
C6 0.017(2) 0.011(2) 0.007(2) 0.0021(18) -0.0009(19) 0.0031(19) 
C7 0.018(2) 0.012(2) 0.004(2) -0.0034(18) -0.0014(18) -0.0025(19) 
C8 0.020(2) 0.009(2) 0.009(2) -0.0033(19) 0.005(2) -0.004(2) 
C9 0.015(2) 0.012(2) 0.011(2) -0.001(2) 0.002(2) -0.005(2) 
C10 0.011(2) 0.012(2) 0.011(2) -0.0003(19) 0.001(2) 0.002(2) 
C11 0.009(2) 0.010(2) 0.006(2) -0.0049(18) 0.0018(19) 0.0001(19) 
C12 0.0089(14) 0.0084(14) 0.0091(13) -0.0005(9) -0.0016(9) -0.0004(9) 
C13 0.0079(13) 0.0071(13) 0.0083(13) -0.0005(9) -0.0002(9) 0.0007(9) 
C14 0.0083(13) 0.0083(13) 0.0075(13) -0.0007(9) 0.0005(9) 0.0002(9) 
C15 0.011(3) 0.021(3) 0.015(3) -0.001(2) -0.003(2) -0.002(2) 
C16 0.021(3) 0.020(3) 0.014(3) 0.010(2) -0.005(3) -0.005(3) 
C17 0.012(3) 0.016(3) 0.022(3) 0.002(3) 0.003(2) -0.009(2) 
C18 0.0088(14) 0.0081(14) 0.0081(13) 0.0000(9) 0.0002(9) 0.0005(9) 
C19 0.0061(13) 0.0069(13) 0.0070(13) 0.0008(9) 0.0006(9) 0.0000(9) 
C20 0.0116(14) 0.0127(14) 0.0119(14) 0.0002(9) 0.0007(9) 0.0003(9) 
C21 0.0130(14) 0.0139(14) 0.0137(14) 0.0007(9) -0.0003(9) -0.0009(9) 
C22 0.009(3) 0.007(3) 0.018(3) 0.005(2) 0.003(2) -0.002(2) 
C23 0.005(3) 0.014(3) 0.013(3) -0.005(2) 0.000(2) -0.001(2) 
C24 0.013(3) 0.014(3) 0.011(3) 0.000(2) -0.006(2) 0.007(2) 
C25 0.0122(14) 0.0114(14) 0.0124(14) 0.0010(9) -0.0012(9) -0.0004(9) 
C26 0.0084(14) 0.0085(14) 0.0087(13) -0.0002(9) 0.0002(9) -0.0010(9) 
C27 0.011(3) 0.007(3) 0.016(3) 0.001(2) 0.004(2) 0.002(2) 
C28 0.007(3) 0.012(3) 0.013(3) -0.004(2) 0.002(2) -0.003(2) 
C29 0.012(3) 0.018(3) 0.006(3) 0.000(2) 0.001(2) -0.005(2) 
C30 0.0066(13) 0.0074(13) 0.0079(13) 0.0007(9) 0.0004(9) 0.0000(9) 
C31 0.0084(13) 0.0075(13) 0.0080(13) 0.0010(9) -0.0001(9) 0.0000(9) 
C32 0.011(3) 0.022(3) 0.022(3) -0.001(3) 0.003(2) 0.007(3) 
C33 0.016(3) 0.023(3) 0.017(3) -0.009(3) 0.005(2) 0.004(3) 
C34 0.021(3) 0.015(3) 0.011(3) -0.003(2) 0.001(2) -0.002(2) 
C35 0.0078(13) 0.0081(13) 0.0075(13) 0.0013(9) 0.0004(9) 0.0004(9) 
C36 0.009(3) 0.005(3) 0.014(3) 0.001(2) -0.003(2) 0.001(2) 
C37 0.0076(14) 0.0081(14) 0.0073(13) -0.0010(9) -0.0004(9) -0.0006(9) 
C38 0.0065(13) 0.0065(13) 0.0061(13) 0.0005(9) 0.0008(9) -0.0001(9) 
C39 0.008(3) 0.008(3) 0.018(3) -0.001(2) 0.001(2) -0.005(2) 
C40 0.0124(14) 0.0131(14) 0.0140(14) 0.0002(9) 0.0002(9) -0.0011(9) 
C41 0.010(3) 0.014(3) 0.012(3) 0.002(2) 0.001(2) 0.002(2) 
C42 0.0070(13) 0.0068(13) 0.0065(13) 0.0008(9) 0.0005(9) 0.0006(9) 
C43 0.0080(14) 0.0073(13) 0.0067(13) -0.0005(9) 0.0001(9) 0.0007(9) 
C44 0.015(3) 0.012(3) 0.008(2) -0.001(2) 0.007(2) -0.007(2) 
C45 0.004(3) 0.012(3) 0.016(3) -0.004(2) -0.001(2) 0.001(2) 
C46 0.007(3) 0.017(3) 0.007(3) 0.000(2) 0.000(2) 0.003(2) 
C47 0.0070(13) 0.0071(13) 0.0062(13) -0.0007(9) 0.0000(9) -0.0001(9) 
C48 0.009(3) 0.014(3) 0.005(2) -0.003(2) -0.001(2) 0.001(2) 
N1 0.017(2) 0.015(2) 0.014(2) -0.0030(17) 0.0013(18) 0.0006(18) 
N2 0.021(2) 0.009(2) 0.0103(19) -0.0017(17) -0.0006(18) -0.0029(18) 
N3 0.0081(12) 0.0086(12) 0.0091(12) 0.0001(9) 0.0003(9) -0.0008(9) 
N4 0.016(3) 0.009(2) 0.012(2) 0.0007(19) -0.0022(19) -0.0022(19) 
N5 0.011(2) 0.007(2) 0.009(2) -0.0010(18) -0.0014(18) -0.0019(18) 
N6 0.010(2) 0.012(2) 0.012(2) 0.0005(18) 0.0012(18) 0.0013(19) 
N7 0.0091(12) 0.0085(12) 0.0093(12) 0.0002(9) 0.0004(9) 0.0007(9) 
N8 0.008(2) 0.004(2) 0.011(2) 0.0011(18) 0.0015(18) 0.0009(18) 
O1 0.013(2) 0.0037(18) 0.0127(18) 0.0016(15) -0.0007(15) -0.0017(15) 
O2 0.017(2) 0.013(2) 0.0119(18) 0.0004(16) 0.0007(16) 0.0022(17) 
O3 0.024(2) 0.009(2) 0.0115(18) 0.0010(15) 0.0056(16) 0.0025(17) 
O4 0.028(2) 0.011(2) 0.0137(19) 0.0012(16) 0.0080(17) -0.0008(17) 
O5 0.012(2) 0.0104(19) 0.0124(18) -0.0033(15) -0.0027(15) -0.0042(16) 
O6 0.014(2) 0.018(2) 0.0102(18) -0.0009(16) 0.0019(16) -0.0042(17) 
O7 0.0048(18) 0.016(2) 0.0099(18) -0.0015(15) -0.0025(15) 0.0004(15) 
O8 0.0076(19) 0.016(2) 0.0084(18) 0.0026(15) -0.0030(15) 0.0009(15) 
O9 0.013(2) 0.026(2) 0.0098(18) 0.0011(16) -0.0004(16) 0.0030(17) 
O10 0.0080(14) 0.0130(15) 0.0111(14) 0.0011(12) -0.0015(12) 0.0016(12) 
O11 0.013(2) 0.014(2) 0.0124(19) -0.0028(16) 0.0034(16) -0.0043(16) 
O12 0.011(2) 0.012(2) 0.0136(18) 0.0027(15) -0.0059(16) 0.0008(16) 
O13 0.018(2) 0.014(2) 0.0188(19) 0.0022(16) 0.0089(17) 0.0024(17) 
O14 0.024(2) 0.007(2) 0.0147(19) 0.0027(15) 0.0038(16) 0.0023(17) 
O15 0.009(2) 0.012(2) 0.0143(18) 0.0003(15) 0.0022(16) 0.0005(16) 
O16 0.012(2) 0.011(2) 0.0147(19) 0.0035(15) 0.0003(15) 0.0050(16) 
O17 0.0159(15) 0.0079(14) 0.0081(13) -0.0036(12) 0.0021(12) 0.0005(12) 
O18 0.015(2) 0.022(2) 0.0074(18) -0.0021(16) -0.0015(15) 0.0023(17) 
O19 0.018(2) 0.018(2) 0.0144(19) 0.0090(16) -0.0026(16) -0.0088(17) 
O20 0.012(2) 0.012(2) 0.0102(18) -0.0028(15) 0.0013(15) 0.0006(16) 
O21 0.015(2) 0.016(2) 0.0112(18) 0.0048(16) 0.0013(15) 0.0029(16) 
O22 0.016(2) 0.015(2) 0.0078(17) -0.0022(15) -0.0001(15) 0.0012(16) 
Cu1 0.0058(3) 0.0066(3) 0.0123(3) -0.0006(3) -0.0013(3) 0.0000(3) 
Nd1 0.00739(15) 0.00688(15) 0.00724(14) 0.00045(11) 0.00014(11) -0.00036(12) 
Nd2 0.00738(15) 0.00654(15) 0.00704(14) 0.00002(11) -0.00049(11) -0.00067(12) 
O24 0.025(2) 0.020(2) 0.030(2) 0.0019(18) -0.0014(18) 0.0004(19) 
O25 0.027(3) 0.026(3) 0.022(2) 0.0032(19) -0.0058(19) 0.007(2) 
O23 0.090(6) 0.111(6) 0.149(6) -0.025(5) 0.008(4) -0.011(5) 
 
_geom_special_details 
; 
 All esds (except the esd in the dihedral angle between two l.s. planes) 
 are estimated using the full covariance matrix.  The cell esds are taken 
 into account individually in the estimation of esds in distances, angles 
 and torsion angles; correlations between esds in cell parameters are only 
 used when they are defined by crystal symmetry.  An approximate (isotropic) 
 treatment of cell esds is used for estimating esds involving l.s. planes. 
; 
 
loop_ 
 _geom_bond_atom_site_label_1 
 _geom_bond_atom_site_label_2 
 _geom_bond_distance 
 _geom_bond_site_symmetry_2 
 _geom_bond_publ_flag 
C1 O2 1.244(6) . ? 
C1 O1 1.271(6) . ? 
C1 C2 1.508(7) . ? 
C1 Nd1 2.954(5) . ? 
C2 C3 1.397(7) . ? 
C2 C6 1.402(7) . ? 
C3 C4 1.384(7) . ? 
C4 C5 1.378(7) . ? 
C5 N1 1.329(6) . ? 
C6 N1 1.352(6) . ? 
C6 C7 1.483(7) . ? 
C7 N2 1.353(6) . ? 
C7 C11 1.392(7) . ? 
C8 N2 1.335(6) . ? 
C8 C9 1.392(7) . ? 
C9 C10 1.376(6) . ? 
C10 C11 1.389(6) . ? 
C11 C12 1.498(6) . ? 
C12 O4 1.252(5) . ? 
C12 O3 1.262(5) . ? 
C12 Nd2 2.904(5) 1_556 ? 
C13 O7 1.249(5) . ? 
C13 O8 1.264(5) . ? 
C13 C14 1.507(6) . ? 
C14 C15 1.396(6) . ? 
C14 C18 1.406(6) . ? 
C15 C16 1.373(7) . ? 
C16 C17 1.372(7) . ? 
C17 N4 1.342(6) . ? 
C18 N4 1.340(6) . ? 
C18 C19 1.492(6) . ? 
C19 N3 1.362(6) . ? 
C19 C23 1.383(6) . ? 
C20 N3 1.354(6) . ? 
C20 C21 1.367(6) . ? 
C21 C22 1.382(6) . ? 
C22 C23 1.383(6) . ? 
C23 C24 1.529(6) . ? 
C24 O6 1.254(6) . ? 
C24 O5 1.257(6) . ? 
C25 O10 1.250(6) . ? 
C25 O9 1.255(5) . ? 
C25 C26 1.519(6) . ? 
C26 C27 1.381(6) . ? 
C26 C30 1.396(6) . ? 
C27 C28 1.377(6) . ? 
C28 C29 1.363(6) . ? 
C29 N5 1.353(6) . ? 
C30 N5 1.357(6) . ? 
C30 C31 1.490(6) . ? 
C31 N6 1.331(6) . ? 
C31 C35 1.403(6) . ? 
C32 N6 1.341(6) . ? 
C32 C33 1.370(7) . ? 
C33 C34 1.374(7) . ? 
C34 C35 1.386(6) . ? 
C35 C36 1.517(6) . ? 
C36 O11 1.250(5) . ? 
C36 O12 1.254(5) . ? 
C37 O13 1.246(5) . ? 
C37 O14 1.249(5) . ? 
C37 C38 1.515(6) . ? 
C37 Nd1 2.988(5) 2_655 ? 
C38 C39 1.394(6) . ? 
C38 C42 1.401(6) . ? 
C39 C40 1.388(6) . ? 
C40 C41 1.382(7) . ? 
C41 N7 1.337(6) . ? 
C42 N7 1.365(6) . ? 
C42 C43 1.478(6) . ? 
C43 N8 1.358(6) . ? 
C43 C47 1.387(6) . ? 
C44 N8 1.348(6) . ? 
C44 C45 1.391(7) . ? 
C45 C46 1.392(7) . ? 
C46 C47 1.389(6) . ? 
C47 C48 1.505(6) . ? 
C48 O15 1.235(5) . ? 
C48 O16 1.282(5) . ? 
C48 Nd2 2.931(5) 2_655 ? 
N3 Cu1 2.033(4) . ? 
N4 Cu1 2.406(4) . ? 
N5 Cu1 2.007(4) . ? 
N6 Cu1 2.382(4) . ? 
N7 Cu1 2.062(4) . ? 
N8 Cu1 2.017(4) . ? 
O1 Nd1 2.520(3) . ? 
O2 Nd1 2.662(3) . ? 
O3 Nd2 2.521(3) 1_556 ? 
O4 Nd2 2.575(3) 1_556 ? 
O7 Nd2 2.388(3) . ? 
O8 Nd1 2.419(3) . ? 
O11 Nd2 2.404(3) 10_675 ? 
O12 Nd1 2.404(3) 10_676 ? 
O13 Nd1 2.661(3) 2_655 ? 
O14 Nd1 2.600(3) 2_655 ? 
O15 Nd2 2.674(3) 2_655 ? 
O16 Nd2 2.475(3) 2_655 ? 
O17 Nd2 2.500(3) . ? 
O18 Nd2 2.450(3) . ? 
O19 Nd2 2.561(3) . ? 
O20 Nd1 2.480(3) . ? 
O21 Nd1 2.466(3) . ? 
O22 Nd1 2.481(3) . ? 
Nd1 O12 2.404(3) 12_756 ? 
Nd1 O14 2.600(3) 8_464 ? 
Nd1 O13 2.661(3) 8_464 ? 
Nd1 C37 2.988(5) 8_464 ? 
Nd2 O11 2.404(3) 12_755 ? 
Nd2 O16 2.474(3) 8_464 ? 
Nd2 O3 2.521(3) 1_554 ? 
Nd2 O4 2.575(3) 1_554 ? 
Nd2 O15 2.674(3) 8_464 ? 
Nd2 C12 2.904(5) 1_554 ? 
Nd2 C48 2.931(5) 8_464 ? 
 
loop_ 
 _geom_angle_atom_site_label_1 
 _geom_angle_atom_site_label_2 
 _geom_angle_atom_site_label_3 
 _geom_angle 
 _geom_angle_site_symmetry_1 
 _geom_angle_site_symmetry_3 
 _geom_angle_publ_flag 
O2 C1 O1 122.1(5) . . ? 
O2 C1 C2 121.4(5) . . ? 
O1 C1 C2 116.5(4) . . ? 
O2 C1 Nd1 64.3(3) . . ? 
O1 C1 Nd1 57.9(2) . . ? 
C2 C1 Nd1 174.3(4) . . ? 
C3 C2 C6 117.7(5) . . ? 
C3 C2 C1 118.8(5) . . ? 
C6 C2 C1 123.5(5) . . ? 
C4 C3 C2 119.7(5) . . ? 
C5 C4 C3 118.2(5) . . ? 
N1 C5 C4 123.6(5) . . ? 
N1 C6 C2 122.1(5) . . ? 
N1 C6 C7 115.4(4) . . ? 
C2 C6 C7 122.5(5) . . ? 
N2 C7 C11 122.3(5) . . ? 
N2 C7 C6 115.2(4) . . ? 
C11 C7 C6 122.4(4) . . ? 
N2 C8 C9 124.6(5) . . ? 
C10 C9 C8 117.6(5) . . ? 
C9 C10 C11 119.4(5) . . ? 
C10 C11 C7 119.0(5) . . ? 
C10 C11 C12 118.6(4) . . ? 
C7 C11 C12 122.4(4) . . ? 
O4 C12 O3 122.2(4) . . ? 
O4 C12 C11 119.3(4) . . ? 
O3 C12 C11 118.5(4) . . ? 
O4 C12 Nd2 62.4(3) . 1_556 ? 
O3 C12 Nd2 60.0(2) . 1_556 ? 
C11 C12 Nd2 173.2(3) . 1_556 ? 
O7 C13 O8 126.0(5) . . ? 
O7 C13 C14 118.4(4) . . ? 
O8 C13 C14 115.6(4) . . ? 
C15 C14 C18 117.6(5) . . ? 
C15 C14 C13 119.0(4) . . ? 
C18 C14 C13 123.2(4) . . ? 
C16 C15 C14 119.5(5) . . ? 
C17 C16 C15 118.8(5) . . ? 
N4 C17 C16 123.4(5) . . ? 
N4 C18 C14 122.3(4) . . ? 
N4 C18 C19 113.3(4) . . ? 
C14 C18 C19 124.3(4) . . ? 
N3 C19 C23 120.5(4) . . ? 
N3 C19 C18 113.9(4) . . ? 
C23 C19 C18 125.6(4) . . ? 
N3 C20 C21 121.3(5) . . ? 
C20 C21 C22 119.7(5) . . ? 
C21 C22 C23 119.3(5) . . ? 
C22 C23 C19 119.5(4) . . ? 
C22 C23 C24 118.3(4) . . ? 
C19 C23 C24 122.2(4) . . ? 
O6 C24 O5 126.6(5) . . ? 
O6 C24 C23 117.5(5) . . ? 
O5 C24 C23 116.0(4) . . ? 
O10 C25 O9 126.5(5) . . ? 
O10 C25 C26 116.3(4) . . ? 
O9 C25 C26 117.1(4) . . ? 
C27 C26 C30 118.6(4) . . ? 
C27 C26 C25 120.0(4) . . ? 
C30 C26 C25 121.4(4) . . ? 
C28 C27 C26 120.1(5) . . ? 
C29 C28 C27 119.0(5) . . ? 
N5 C29 C28 122.2(5) . . ? 
N5 C30 C26 120.8(4) . . ? 
N5 C30 C31 113.8(4) . . ? 
C26 C30 C31 125.2(4) . . ? 
N6 C31 C35 122.2(4) . . ? 
N6 C31 C30 112.8(4) . . ? 
C35 C31 C30 124.9(4) . . ? 
N6 C32 C33 123.4(5) . . ? 
C32 C33 C34 118.3(5) . . ? 
C33 C34 C35 119.9(5) . . ? 
C34 C35 C31 117.7(5) . . ? 
C34 C35 C36 119.2(4) . . ? 
C31 C35 C36 123.0(4) . . ? 
O11 C36 O12 126.6(5) . . ? 
O11 C36 C35 116.5(4) . . ? 
O12 C36 C35 116.7(4) . . ? 
O13 C37 O14 122.8(4) . . ? 
O13 C37 C38 117.7(4) . . ? 
O14 C37 C38 119.4(4) . . ? 
O13 C37 Nd1 62.8(2) . 2_655 ? 
O14 C37 Nd1 60.0(2) . 2_655 ? 
C38 C37 Nd1 173.5(3) . 2_655 ? 
C39 C38 C42 117.2(4) . . ? 
C39 C38 C37 119.9(4) . . ? 
C42 C38 C37 122.5(4) . . ? 
C40 C39 C38 120.5(5) . . ? 
C41 C40 C39 119.1(5) . . ? 
N7 C41 C40 121.2(5) . . ? 
N7 C42 C38 121.2(4) . . ? 
N7 C42 C43 113.1(4) . . ? 
C38 C42 C43 125.7(4) . . ? 
N8 C43 C47 121.7(4) . . ? 
N8 C43 C42 112.8(4) . . ? 
C47 C43 C42 125.4(4) . . ? 
N8 C44 C45 122.3(5) . . ? 
C44 C45 C46 117.9(5) . . ? 
C47 C46 C45 120.3(5) . . ? 
C43 C47 C46 118.4(4) . . ? 
C43 C47 C48 123.2(4) . . ? 
C46 C47 C48 117.8(4) . . ? 
O15 C48 O16 122.6(5) . . ? 
O15 C48 C47 121.9(4) . . ? 
O16 C48 C47 115.4(4) . . ? 
O15 C48 Nd2 65.8(3) . 2_655 ? 
O16 C48 Nd2 56.8(2) . 2_655 ? 
C47 C48 Nd2 170.3(3) . 2_655 ? 
C5 N1 C6 118.3(5) . . ? 
C8 N2 C7 117.0(4) . . ? 
C20 N3 C19 119.7(4) . . ? 
C20 N3 Cu1 119.1(3) . . ? 
C19 N3 Cu1 118.5(3) . . ? 
C18 N4 C17 118.0(4) . . ? 
C18 N4 Cu1 103.2(3) . . ? 
C17 N4 Cu1 124.8(3) . . ? 
C29 N5 C30 119.2(4) . . ? 
C29 N5 Cu1 119.3(3) . . ? 
C30 N5 Cu1 117.8(3) . . ? 
C31 N6 C32 118.2(4) . . ? 
C31 N6 Cu1 102.7(3) . . ? 
C32 N6 Cu1 124.0(3) . . ? 
C41 N7 C42 120.2(4) . . ? 
C41 N7 Cu1 126.4(3) . . ? 
C42 N7 Cu1 110.0(3) . . ? 
C44 N8 C43 119.0(4) . . ? 
C44 N8 Cu1 123.9(3) . . ? 
C43 N8 Cu1 111.5(3) . . ? 
C1 O1 Nd1 96.8(3) . . ? 
C1 O2 Nd1 90.8(3) . . ? 
C12 O3 Nd2 94.4(3) . 1_556 ? 
C12 O4 Nd2 92.1(3) . 1_556 ? 
C13 O7 Nd2 165.1(3) . . ? 
C13 O8 Nd1 138.9(3) . . ? 
C36 O11 Nd2 146.7(3) . 10_675 ? 
C36 O12 Nd1 161.1(3) . 10_676 ? 
C37 O13 Nd1 92.5(3) . 2_655 ? 
C37 O14 Nd1 95.4(3) . 2_655 ? 
C48 O15 Nd2 89.3(3) . 2_655 ? 
C48 O16 Nd2 97.5(3) . 2_655 ? 
N5 Cu1 N8 174.39(15) . . ? 
N5 Cu1 N3 85.84(16) . . ? 
N8 Cu1 N3 95.79(16) . . ? 
N5 Cu1 N7 97.09(16) . . ? 
N8 Cu1 N7 81.73(16) . . ? 
N3 Cu1 N7 174.60(15) . . ? 
N5 Cu1 N6 76.16(14) . . ? 
N8 Cu1 N6 98.26(14) . . ? 
N3 Cu1 N6 99.60(14) . . ? 
N7 Cu1 N6 85.53(14) . . ? 
N5 Cu1 N4 99.90(14) . . ? 
N8 Cu1 N4 85.71(15) . . ? 
N3 Cu1 N4 75.44(14) . . ? 
N7 Cu1 N4 99.54(14) . . ? 
N6 Cu1 N4 174.01(14) . . ? 
O12 Nd1 O8 138.97(11) 12_756 . ? 
O12 Nd1 O21 72.60(11) 12_756 . ? 
O8 Nd1 O21 75.01(11) . . ? 
O12 Nd1 O20 148.23(11) 12_756 . ? 
O8 Nd1 O20 72.64(10) . . ? 
O21 Nd1 O20 132.79(10) . . ? 
O12 Nd1 O22 76.33(11) 12_756 . ? 
O8 Nd1 O22 72.45(10) . . ? 
O21 Nd1 O22 77.14(11) . . ? 
O20 Nd1 O22 122.74(11) . . ? 
O12 Nd1 O1 68.30(11) 12_756 . ? 
O8 Nd1 O1 139.74(10) . . ? 
O21 Nd1 O1 140.85(10) . . ? 
O20 Nd1 O1 83.80(10) . . ? 
O22 Nd1 O1 95.16(11) . . ? 
O12 Nd1 O14 104.05(11) 12_756 8_464 ? 
O8 Nd1 O14 86.50(10) . 8_464 ? 
O21 Nd1 O14 68.51(11) . 8_464 ? 
O20 Nd1 O14 76.04(11) . 8_464 ? 
O22 Nd1 O14 143.41(11) . 8_464 ? 
O1 Nd1 O14 119.38(10) . 8_464 ? 
O12 Nd1 O13 78.25(11) 12_756 8_464 ? 
O8 Nd1 O13 131.99(10) . 8_464 ? 
O21 Nd1 O13 99.46(11) . 8_464 ? 
O20 Nd1 O13 78.54(11) . 8_464 ? 
O22 Nd1 O13 154.19(10) . 8_464 ? 
O1 Nd1 O13 71.11(10) . 8_464 ? 
O14 Nd1 O13 49.19(10) 8_464 8_464 ? 
O12 Nd1 O2 103.37(10) 12_756 . ? 
O8 Nd1 O2 90.07(11) . . ? 
O21 Nd1 O2 146.38(11) . . ? 
O20 Nd1 O2 66.57(10) . . ? 
O22 Nd1 O2 69.61(11) . . ? 
O1 Nd1 O2 50.17(10) . . ? 
O14 Nd1 O2 141.68(10) 8_464 . ? 
O13 Nd1 O2 112.59(10) 8_464 . ? 
O12 Nd1 C1 85.30(12) 12_756 . ? 
O8 Nd1 C1 114.85(13) . . ? 
O21 Nd1 C1 151.99(11) . . ? 
O20 Nd1 C1 74.33(12) . . ? 
O22 Nd1 C1 81.13(12) . . ? 
O1 Nd1 C1 25.29(12) . . ? 
O14 Nd1 C1 135.41(12) 8_464 . ? 
O13 Nd1 C1 92.44(12) 8_464 . ? 
O2 Nd1 C1 24.89(11) . . ? 
O12 Nd1 C37 90.73(12) 12_756 8_464 ? 
O8 Nd1 C37 109.73(12) . 8_464 ? 
O21 Nd1 C37 83.14(12) . 8_464 ? 
O20 Nd1 C37 76.60(12) . 8_464 ? 
O22 Nd1 C37 158.90(12) . 8_464 ? 
O1 Nd1 C37 95.40(12) . 8_464 ? 
O14 Nd1 C37 24.58(11) 8_464 8_464 ? 
O13 Nd1 C37 24.62(11) 8_464 8_464 ? 
O2 Nd1 C37 130.47(12) . 8_464 ? 
C1 Nd1 C37 114.82(13) . 8_464 ? 
O7 Nd2 O11 145.18(11) . 12_755 ? 
O7 Nd2 O18 72.48(11) . . ? 
O11 Nd2 O18 81.14(11) 12_755 . ? 
O7 Nd2 O16 73.31(11) . 8_464 ? 
O11 Nd2 O16 133.23(11) 12_755 8_464 ? 
O18 Nd2 O16 144.95(11) . 8_464 ? 
O7 Nd2 O17 75.49(11) . . ? 
O11 Nd2 O17 77.27(11) 12_755 . ? 
O18 Nd2 O17 78.35(11) . . ? 
O16 Nd2 O17 100.24(11) 8_464 . ? 
O7 Nd2 O3 108.88(11) . 1_554 ? 
O11 Nd2 O3 81.68(11) 12_755 1_554 ? 
O18 Nd2 O3 69.61(11) . 1_554 ? 
O16 Nd2 O3 115.50(11) 8_464 1_554 ? 
O17 Nd2 O3 143.89(11) . 1_554 ? 
O7 Nd2 O19 140.13(11) . . ? 
O11 Nd2 O19 74.55(11) 12_755 . ? 
O18 Nd2 O19 136.60(10) . . ? 
O16 Nd2 O19 71.26(11) 8_464 . ? 
O17 Nd2 O19 128.40(11) . . ? 
O3 Nd2 O19 71.69(11) 1_554 . ? 
O7 Nd2 O4 75.42(11) . 1_554 ? 
O11 Nd2 O4 130.05(10) 12_755 1_554 ? 
O18 Nd2 O4 94.54(11) . 1_554 ? 
O16 Nd2 O4 69.53(11) 8_464 1_554 ? 
O17 Nd2 O4 150.85(10) . 1_554 ? 
O3 Nd2 O4 51.14(10) 1_554 1_554 ? 
O19 Nd2 O4 75.57(11) . 1_554 ? 
O7 Nd2 O15 103.74(10) . 8_464 ? 
O11 Nd2 O15 86.67(11) 12_755 8_464 ? 
O18 Nd2 O15 147.88(11) . 8_464 ? 
O16 Nd2 O15 50.58(10) 8_464 8_464 ? 
O17 Nd2 O15 69.99(10) . 8_464 ? 
O3 Nd2 O15 137.77(10) 1_554 8_464 ? 
O19 Nd2 O15 66.08(10) . 8_464 ? 
O4 Nd2 O15 115.77(11) 1_554 8_464 ? 
O7 Nd2 C12 91.38(12) . 1_554 ? 
O11 Nd2 C12 106.48(12) 12_755 1_554 ? 
O18 Nd2 C12 80.47(12) . 1_554 ? 
O16 Nd2 C12 92.97(12) 8_464 1_554 ? 
O17 Nd2 C12 157.64(12) . 1_554 ? 
O3 Nd2 C12 25.68(11) 1_554 1_554 ? 
O19 Nd2 C12 72.94(12) . 1_554 ? 
O4 Nd2 C12 25.51(11) 1_554 1_554 ? 
O15 Nd2 C12 131.61(12) 8_464 1_554 ? 
O7 Nd2 C48 89.15(12) . 8_464 ? 
O11 Nd2 C48 109.69(12) 12_755 8_464 ? 
O18 Nd2 C48 157.72(11) . 8_464 ? 
O16 Nd2 C48 25.69(12) 8_464 8_464 ? 
O17 Nd2 C48 85.02(12) . 8_464 ? 
O3 Nd2 C48 130.01(12) 1_554 8_464 ? 
O19 Nd2 C48 65.66(12) . 8_464 ? 
O4 Nd2 C48 92.82(12) 1_554 8_464 ? 
O15 Nd2 C48 24.90(11) 8_464 8_464 ? 
C12 Nd2 C48 113.25(14) 1_554 8_464 ? 
#===END

 
data_7-Eu2Cu2 
_audit_creation_date              2014-08-23
_audit_creation_method
;
Olex2 1.2
(compiled 2014.03.20 svn.r2914 for OlexSys, GUI svn.r4816)
;
_publ_contact_author_address      ?
_publ_contact_author_email        ?
_publ_contact_author_name         ''
_publ_contact_author_phone        ?
_publ_section_references
;
Dolomanov, O.V., Bourhis, L.J., Gildea, R.J, Howard, J.A.K. & Puschmann, H.
 (2009), J. Appl. Cryst. 42, 339-341.

Sheldrick, G.M. (2008). Acta Cryst. A64, 112-122.
; 
_chemical_name_common             ? 
_chemical_melting_point           ? 
_chemical_formula_moiety          'C60 H42 Cu2 Eu2 N10 O27, 8(O)' 
_chemical_formula_sum 
 'C60 H42 Cu2 Eu2 N10 O35' 
_chemical_formula_weight          1894.08 
 
loop_ 
 _atom_type_symbol 
 _atom_type_description 
 _atom_type_scat_dispersion_real 
 _atom_type_scat_dispersion_imag 
 _atom_type_scat_source 
 'C'  'C'   0.0030   0.0020 
 'International Tables Vol C Tables 4.2.6.8 and 6.1.1.4' 
 'H'  'H'   0.0000   0.0000 
 'International Tables Vol C Tables 4.2.6.8 and 6.1.1.4' 
 'Cu'  'Cu'   0.3200   1.2650 
 'International Tables Vol C Tables 4.2.6.8 and 6.1.1.4' 
 'Eu'  'Eu'  -0.1580   3.6680 
 'International Tables Vol C Tables 4.2.6.8 and 6.1.1.4' 
 'N'  'N'   0.0060   0.0030 
 'International Tables Vol C Tables 4.2.6.8 and 6.1.1.4' 
 'O'  'O'   0.0110   0.0060 
 'International Tables Vol C Tables 4.2.6.8 and 6.1.1.4' 
 
_symmetry_cell_setting            'monoclinic'
_space_group_IT_number            14
_space_group_name_H-M_alt    'P21/c' 
_space_group_name_Hall                '-p 2ybc' 
 
loop_ 
 _symmetry_equiv_pos_as_xyz 
 'x, y, z' 
 '-x, y+1/2, -z+1/2' 
 '-x, -y, -z' 
 'x, -y-1/2, z-1/2' 
 
_cell_length_a                    11.2835(3) 
_cell_length_b                    22.3634(7) 
_cell_length_c                    27.3143(14) 
_cell_angle_alpha                 90.00 
_cell_angle_beta                  99.148(4) 
_cell_angle_gamma                 90.00 
_cell_volume                      6804.8(4) 
_cell_formula_units_Z             4 
_cell_measurement_temperature     120.0 
_cell_measurement_reflns_used     ? 
_cell_measurement_theta_min       2.3564 
_cell_measurement_theta_max       29.2481 
_exptl_absorpt_coefficient_mu     2.540
_exptl_absorpt_correction_T_min   0.608 
_exptl_absorpt_correction_T_max   0.776
_exptl_absorpt_correction_type    multi-scan 
_exptl_absorpt_process_details    
;
CrysAlisPro, Agilent Technologies,
Version 1.171.35.19 (release 27-10-2011 CrysAlis171 .NET)
(compiled Oct 27 2011,15:02:11)
Empirical absorption correction using spherical harmonics,
 implemented in SCALE3 ABSPACK scaling algorithm.
;  
_exptl_crystal_description        flaky 
_exptl_crystal_colour             green 
_exptl_crystal_size_max           0.20 
_exptl_crystal_size_mid           0.20 
_exptl_crystal_size_min           0.10 
_exptl_crystal_density_meas       ? 
_exptl_crystal_density_diffrn     1.849 
_exptl_crystal_density_method     'not measured' 
_exptl_crystal_F_000              3744 
_exptl_special_details 
; 
 ? 
; 

_diffrn_reflns_number             22236
_diffrn_reflns_theta_full         25.01
_diffrn_ambient_temperature       120.0(2) 
_diffrn_detector_area_resol_mean  ?
_diffrn_measured_fraction_theta_max    0.998 
_diffrn_measured_fraction_theta_full   0.998
_diffrn_reflns_av_R_equivalents 0.0537
_diffrn_reflns_av_sigmaI/netI 0.1929
_diffrn_reflns_limit_h_min -13
_diffrn_reflns_limit_h_max 12
_diffrn_reflns_limit_k_min -24
_diffrn_reflns_limit_k_max 26
_diffrn_reflns_limit_l_min -32
_diffrn_reflns_limit_l_max 15
_diffrn_reflns_theta_min 2.36
_diffrn_reflns_theta_max 25.01
_diffrn_orient_matrix_UB_11      -0.0593251000
_diffrn_orient_matrix_UB_12       0.0070609000
_diffrn_orient_matrix_UB_13       0.0035651000
_diffrn_orient_matrix_UB_21       0.0180835000
_diffrn_orient_matrix_UB_22      -0.0012540000
_diffrn_orient_matrix_UB_23       0.0260598000
_diffrn_orient_matrix_UB_31       0.0142921000
_diffrn_orient_matrix_UB_32       0.0308991000
_diffrn_orient_matrix_UB_33       0.0002672000
_diffrn_measurement_details
;
#__ type_ start__ end____ width___ exp.time_
  1 omega  -74.00  -42.00   1.0000   40.0000
omega____ theta____ kappa____ phi______ frames
    -      -18.8185  135.0000  -50.0000 32

#__ type_ start__ end____ width___ exp.time_
  2 omega  -92.00   16.00   1.0000   40.0000
omega____ theta____ kappa____ phi______ frames
    -      -18.8185  -17.0000  -93.0000 108

#__ type_ start__ end____ width___ exp.time_
  3 omega  -91.00  -41.00   1.0000   40.0000
omega____ theta____ kappa____ phi______ frames
    -      -18.8185  -37.0000 -150.0000 50

;

_reflns_odcompleteness_completeness	95.52
_reflns_odcompleteness_theta		26.32
_reflns_odcompleteness_iscentric		1

_diffrn_measurement_device_type   'SuperNova, Single source at offset), Eos'
_diffrn_measurement_method        '\w scans'

_diffrn_radiation_wavelength      0.71073 
_diffrn_radiation_type            MoK\a 
_diffrn_source                    'SuperNova (Mo) X-ray Source' 
_diffrn_radiation_monochromator   mirror 
_diffrn_standards_number          ? 
_diffrn_standards_interval_count  ? 
_diffrn_standards_interval_time   ? 
_diffrn_standards_decay_%         ? 
_reflns_number_total              11559 
_reflns_number_gt                 7362 
_reflns_threshold_expression      >2sigma(I) 
_computing_cell_refinement
;
CrysAlisPro, Agilent Technologies,
Version 1.171.35.19 (release 27-10-2011 CrysAlis171 .NET)
(compiled Oct 27 2011,15:02:11)
;
_computing_data_collection
;
CrysAlisPro, Agilent Technologies,
Version 1.171.35.19 (release 27-10-2011 CrysAlis171 .NET)
(compiled Oct 27 2011,15:02:11)
;
_computing_data_reduction
;
CrysAlisPro, Agilent Technologies,
Version 1.171.35.19 (release 27-10-2011 CrysAlis171 .NET)
(compiled Oct 27 2011,15:02:11)
;
_computing_molecular_graphics     'Olex2 (Dolomanov et al., 2009)'
_computing_publication_material   'Olex2 (Dolomanov et al., 2009)'
_computing_structure_refinement   'XL (Sheldrick, 2008)'
_computing_structure_solution     'XS (Sheldrick, 2008)'

_refine_diff_density_max    1.293 
_refine_diff_density_min   -1.070 
_refine_diff_density_rms    0.169
_refine_ls_extinction_method      none 
_refine_ls_extinction_coef        ? 
_refine_ls_goodness_of_fit_ref    1.075
_refine_ls_hydrogen_treatment     mixed
_refine_ls_matrix_type            full
_refine_ls_number_reflns          11559 
_refine_ls_number_parameters      988 
_refine_ls_number_restraints      222 
_refine_ls_R_factor_all           0.0981 
_refine_ls_R_factor_gt            0.0592
_refine_ls_restrained_S_all       1.059
_refine_ls_shift/su_max           0.007 
_refine_ls_shift/su_mean          0.000 
_refine_ls_structure_factor_coef  Fsqd   
_refine_ls_weighting_scheme       calc  
_refine_ls_weighting_details 
 'calc w=1/[\s^2^(Fo^2^)+(0.0425P)^2^+36.6849P] where P=(Fo^2^+2Fc^2^)/3'  
_refine_ls_wR_factor_ref          0.1501 
_refine_ls_wR_factor_gt           0.1203 
_refine_special_details 
; 
 Refinement of F^2^ against ALL reflections.  The weighted R-factor wR and 
 goodness of fit S are based on F^2^, conventional R-factors R are based 
 on F, with F set to zero for negative F^2^. The threshold expression of 
 F^2^ > 2sigma(F^2^) is used only for calculating R-factors(gt) etc. and is 
 not relevant to the choice of reflections for refinement.  R-factors based 
 on F^2^ are statistically about twice as large as those based on F, and R- 
 factors based on ALL data will be even larger. 
; 
_olex2_refinement_description
;
1. Fixed Uiso
 At 1.2 times of:
  All C(H) groups
 At 1.5 times of:
  All O(H,H) groups
2. Uiso/Uaniso restraints and constraints
 C7 \\sim C8 \\sim C9 \\sim C10 \\sim N4: within 1.7A with sigma of 0.01 and 
sigma for terminal atoms of 0.02
C7 \\del N4 \\del C8 \\del C9 \\del C10 \\del C11: with sigma of 0.001
N1 \\del C18 \\del C19 \\del C20: with sigma of 0.001
C26 \\del C27 \\del C28 \\del C30: with sigma of 0.001
Uains(C8) \\sim Ueq: with sigma of 0.001 and sigma for terminal atoms of 0.002
Uains(N4) \\sim Ueq: with sigma of 0.001 and sigma for terminal atoms of 0.002
Uains(C9) \\sim Ueq: with sigma of 0.001 and sigma for terminal atoms of 0.002
Uains(C10) \\sim Ueq: with sigma of 0.001 and sigma for terminal atoms of 0.002
Uains(C11) \\sim Ueq: with sigma of 0.001 and sigma for terminal atoms of 0.002
Uains(C12) \\sim Ueq: with sigma of 0.001 and sigma for terminal atoms of 0.002
Uains(O4) \\sim Ueq: with sigma of 0.001 and sigma for terminal atoms of 0.002
Uains(O3) \\sim Ueq: with sigma of 0.001 and sigma for terminal atoms of 0.002
Uains(C48) \\sim Ueq: with sigma of 0.001 and sigma for terminal atoms of 0.002
Uains(O13) \\sim Ueq: with sigma of 0.001 and sigma for terminal atoms of 0.002
Uains(C13) \\sim Ueq: with sigma of 0.001 and sigma for terminal atoms of 0.002
Uains(C20) \\sim Ueq: with sigma of 0.001 and sigma for terminal atoms of 0.002
Uains(C7) \\sim Ueq: with sigma of 0.001 and sigma for terminal atoms of 0.002
Uains(C24) \\sim Ueq: with sigma of 0.001 and sigma for terminal atoms of 0.002
Uains(C26) \\sim Ueq: with sigma of 0.001 and sigma for terminal atoms of 0.002
Uains(C28) \\sim Ueq: with sigma of 0.001 and sigma for terminal atoms of 0.002
Uains(C50) \\sim Ueq: with sigma of 0.001 and sigma for terminal atoms of 0.002
Uains(O10) \\sim Ueq: with sigma of 0.001 and sigma for terminal atoms of 0.002
Uains(C34) \\sim Ueq: with sigma of 0.001 and sigma for terminal atoms of 0.002
Uains(C18) \\sim Ueq: with sigma of 0.001 and sigma for terminal atoms of 0.002
Uains(C36) \\sim Ueq: with sigma of 0.001 and sigma for terminal atoms of 0.002
Uains(C19) \\sim Ueq: with sigma of 0.001 and sigma for terminal atoms of 0.002
Uains(C53) \\sim Ueq: with sigma of 0.001 and sigma for terminal atoms of 0.002
Uains(C59) \\sim Ueq: with sigma of 0.001 and sigma for terminal atoms of 0.002
3.a Rotating group:
 O21(H21a,H21b), O22(H22a,H22b),O23(H23a,H23b), O24(H24a,H24b), O25(H25a,H25b), 
O26(H26a,H26b)
3.b Aromatic/amide H refined with riding coordinates:
 C3(H3), C4(H4), C5(H5), C8(H8), C9(H9), C10(H10), C15(H15), C16(H16),
 C17(H17), C20(H20), C21(H21), C22(H22), C27(H27), C28(H28), C29(H29), 
C32(H32), C33(H33), C34(H34), C39(H39), C40(H40), C41(H41), C44(H44), 
C45(H45), C46(H46), C51(H51), C52(H52), C53(H53), C57(H57), C58(H58), 
C56(H56)
; 
_atom_sites_solution_primary      direct 
_atom_sites_solution_secondary    difmap 
_atom_sites_solution_hydrogens    geom 
loop_
  _platon_squeeze_void_nr
  _platon_squeeze_void_average_x
  _platon_squeeze_void_average_y
  _platon_squeeze_void_average_z
  _platon_squeeze_void_volume
  _platon_squeeze_void_count_electrons
  _platon_squeeze_void_content
   1  0.150  0.852  0.371         7         1 ' '
   2  0.150  0.648  0.871         7         1 ' '
   3  0.499  0.648  0.076        34         6 ' '
   4  0.501  0.148  0.424        34         6 ' '
   5  0.499  0.852  0.576        34         6 ' '
   6  0.501  0.352  0.924        34         6 ' '
   7  0.850  0.352  0.129         7         1 ' '
   8  0.850  0.148  0.629         7         1 ' '
_platon_squeeze_details
; 
; 
 
loop_ 
 _atom_site_label 
 _atom_site_type_symbol 
 _atom_site_fract_x 
 _atom_site_fract_y 
 _atom_site_fract_z 
 _atom_site_U_iso_or_equiv 
 _atom_site_adp_type 
 _atom_site_occupancy 
 _atom_site_symmetry_multiplicity 
 _atom_site_calc_flag 
 _atom_site_refinement_flags 
 _atom_site_disorder_assembly 
 _atom_site_disorder_group 
C1 C -0.2056(9) 0.2748(3) 0.5822(4) 0.021(2) Uani 1 1 d . . . 
C2 C -0.1028(8) 0.2607(3) 0.5547(3) 0.021(2) Uani 1 1 d . . . 
C3 C -0.0040(8) 0.2322(4) 0.5812(4) 0.030(2) Uani 1 1 d . . . 
H3 H 0.0017 0.2271 0.6153 0.037 Uiso 1 1 calc R . . 
C4 C 0.0875(9) 0.2110(4) 0.5565(4) 0.033(3) Uani 1 1 d U . . 
H4 H 0.1537 0.1911 0.5736 0.040 Uiso 1 1 calc R . . 
C5 C 0.0762(8) 0.2208(4) 0.5049(3) 0.023(2) Uani 1 1 d . . . 
H5 H 0.1365 0.2074 0.4880 0.027 Uiso 1 1 calc R . . 
C6 C -0.1082(8) 0.2694(3) 0.5033(3) 0.018(2) Uani 1 1 d . . . 
C7 C -0.2162(11) 0.2942(5) 0.4691(4) 0.046(2) Uani 1 1 d U . . 
C8 C -0.3618(11) 0.2642(5) 0.4055(5) 0.0589(18) Uani 1 1 d U . . 
H8 H -0.3944 0.2337 0.3845 0.071 Uiso 1 1 calc R . . 
C9 C -0.4244(13) 0.3153(5) 0.4054(5) 0.074(3) Uani 1 1 d U . . 
H9 H -0.4996 0.3198 0.3861 0.088 Uiso 1 1 calc R . . 
C10 C -0.3703(12) 0.3618(5) 0.4360(5) 0.060(2) Uani 1 1 d U . . 
H10 H -0.4037 0.3999 0.4330 0.072 Uiso 1 1 calc R . . 
C11 C -0.2653(11) 0.3515(5) 0.4713(4) 0.046(3) Uani 1 1 d U . . 
C12 C -0.2089(12) 0.4011(5) 0.5014(5) 0.056(3) Uani 1 1 d U . . 
C13 C -0.2097(8) 0.4368(3) 0.3086(3) 0.0153(19) Uani 1 1 d U . . 
C14 C -0.1173(7) 0.4139(3) 0.3516(3) 0.015(2) Uani 1 1 d . . . 
C15 C -0.0782(7) 0.4536(3) 0.3909(3) 0.0147(19) Uani 1 1 d U . . 
H15 H -0.1008 0.4936 0.3884 0.018 Uiso 1 1 calc R . . 
C16 C -0.0067(7) 0.4330(3) 0.4329(3) 0.016(2) Uani 1 1 d . . . 
H16 H 0.0260 0.4593 0.4578 0.019 Uiso 1 1 calc R . . 
C17 C 0.0157(7) 0.3719(3) 0.4375(3) 0.019(2) Uani 1 1 d . . . 
H17 H 0.0555 0.3569 0.4674 0.022 Uiso 1 1 calc R . . 
C18 C -0.0759(7) 0.3556(3) 0.3562(3) 0.0119(12) Uani 1 1 d U . . 
C19 C -0.0843(7) 0.3118(3) 0.3158(3) 0.0117(11) Uani 1 1 d U . . 
C20 C -0.1125(7) 0.2104(3) 0.2966(3) 0.0127(12) Uani 1 1 d U . . 
H20 H -0.1272 0.1716 0.3063 0.015 Uiso 1 1 calc R . . 
C21 C -0.1034(7) 0.2217(3) 0.2470(3) 0.018(2) Uani 1 1 d . . . 
H21 H -0.1161 0.1912 0.2236 0.022 Uiso 1 1 calc R . . 
C22 C -0.0753(8) 0.2791(3) 0.2330(3) 0.018(2) Uani 1 1 d . . . 
H22 H -0.0663 0.2871 0.2004 0.021 Uiso 1 1 calc R . . 
C23 C -0.0605(7) 0.3247(3) 0.2685(3) 0.0103(18) Uani 1 1 d . . . 
C24 C -0.0044(8) 0.3839(3) 0.2565(3) 0.0148(19) Uani 1 1 d U . . 
C25 C 0.3636(7) 0.4125(3) 0.1950(3) 0.0106(18) Uani 1 1 d . . . 
C26 C 0.3405(7) 0.3512(3) 0.1691(3) 0.0105(14) Uani 1 1 d U . . 
C27 C 0.2679(7) 0.3114(3) 0.1905(3) 0.0153(16) Uani 1 1 d U . . 
H27 H 0.2239 0.3244 0.2146 0.018 Uiso 1 1 calc R . . 
C28 C 0.2630(7) 0.2531(3) 0.1754(3) 0.019(2) Uani 1 1 d U . . 
H28 H 0.2133 0.2259 0.1881 0.022 Uiso 1 1 calc R . . 
C29 C 0.3331(7) 0.2354(3) 0.1412(3) 0.0140(19) Uani 1 1 d . . . 
H29 H 0.3344 0.1951 0.1328 0.017 Uiso 1 1 calc R . . 
C30 C 0.3977(7) 0.3323(3) 0.1316(3) 0.0124(16) Uani 1 1 d U . . 
C31 C 0.4668(7) 0.3693(3) 0.0996(3) 0.0121(18) Uani 1 1 d U . . 
C32 C 0.6261(8) 0.3664(3) 0.0547(3) 0.017(2) Uani 1 1 d . . . 
H32 H 0.6869 0.3447 0.0436 0.020 Uiso 1 1 calc R . . 
C33 C 0.6094(8) 0.4253(3) 0.0412(3) 0.018(2) Uani 1 1 d . . . 
H33 H 0.6596 0.4439 0.0220 0.021 Uiso 1 1 calc R . . 
C34 C 0.5141(7) 0.4569(3) 0.0571(3) 0.0106(18) Uani 1 1 d U . . 
H34 H 0.5019 0.4970 0.0487 0.013 Uiso 1 1 calc R . . 
C35 C 0.4392(7) 0.4288(3) 0.0850(3) 0.0131(19) Uani 1 1 d . . . 
C36 C 0.3279(7) 0.4606(3) 0.0940(3) 0.0084(17) Uani 1 1 d U . . 
C37 C 0.2800(7) 0.5573(3) 0.3061(3) 0.0113(19) Uani 1 1 d . . . 
C38 C 0.3611(7) 0.5809(3) 0.3510(3) 0.0129(19) Uani 1 1 d . . . 
C39 C 0.3807(8) 0.5456(4) 0.3931(3) 0.021(2) Uani 1 1 d . . . 
H39 H 0.3532 0.5063 0.3914 0.025 Uiso 1 1 calc R . . 
C40 C 0.4396(8) 0.5672(3) 0.4371(3) 0.023(2) Uani 1 1 d . . . 
H40 H 0.4574 0.5426 0.4648 0.027 Uiso 1 1 calc R . . 
C41 C 0.4722(8) 0.6271(3) 0.4393(3) 0.022(2) Uani 1 1 d . . . 
H41 H 0.5053 0.6435 0.4697 0.026 Uiso 1 1 calc R . . 
C42 C 0.4058(7) 0.6395(3) 0.3545(3) 0.0116(18) Uani 1 1 d U . . 
C43 C 0.4083(7) 0.6813(3) 0.3112(3) 0.0111(18) Uani 1 1 d . . . 
C44 C 0.3789(8) 0.7795(3) 0.2856(3) 0.019(2) Uani 1 1 d . . . 
H44 H 0.3586 0.8187 0.2921 0.023 Uiso 1 1 calc R . . 
C45 C 0.4068(7) 0.7657(3) 0.2392(3) 0.015(2) Uani 1 1 d . . . 
H45 H 0.4024 0.7947 0.2146 0.018 Uiso 1 1 calc R . . 
C46 C 0.4416(7) 0.7072(3) 0.2304(3) 0.016(2) Uani 1 1 d . . . 
H46 H 0.4627 0.6968 0.1999 0.019 Uiso 1 1 calc R . . 
C47 C 0.4442(7) 0.6649(3) 0.2675(3) 0.0129(19) Uani 1 1 d . . . 
C48 C 0.5012(7) 0.6052(3) 0.2601(3) 0.0098(17) Uani 1 1 d U . . 
C49 C -0.1356(8) 0.5776(3) 0.1951(3) 0.014(2) Uani 1 1 d . . . 
C50 C -0.1695(7) 0.6384(3) 0.1712(3) 0.0097(17) Uani 1 1 d U . . 
C51 C -0.2445(7) 0.6757(3) 0.1933(3) 0.0138(19) Uani 1 1 d . . . 
H51 H -0.2804 0.6618 0.2195 0.017 Uiso 1 1 calc R . . 
C52 C -0.2654(8) 0.7336(3) 0.1758(3) 0.023(2) Uani 1 1 d . . . 
H52 H -0.3156 0.7595 0.1896 0.028 Uiso 1 1 calc R . . 
C53 C -0.2079(8) 0.7513(4) 0.1367(3) 0.019(2) Uani 1 1 d U . . 
H53 H -0.2193 0.7905 0.1255 0.023 Uiso 1 1 calc R . . 
C54 C -0.1223(7) 0.6591(3) 0.1306(3) 0.0126(18) Uani 1 1 d U . . 
C55 C -0.0447(7) 0.6242(3) 0.1011(3) 0.0110(18) Uani 1 1 d . . . 
C56 C 0.1263(8) 0.6285(4) 0.0638(3) 0.023(2) Uani 1 1 d . . . 
H56 H 0.1917 0.6501 0.0566 0.027 Uiso 1 1 calc R . . 
C57 C 0.1114(8) 0.5698(3) 0.0471(3) 0.016(2) Uani 1 1 d . . . 
H57 H 0.1656 0.5521 0.0292 0.019 Uiso 1 1 calc R . . 
C58 C 0.0128(8) 0.5387(3) 0.0582(3) 0.019(2) Uani 1 1 d . . . 
H58 H 0.0005 0.4993 0.0479 0.022 Uiso 1 1 calc R . . 
C59 C -0.0672(7) 0.5658(3) 0.0844(3) 0.0106(18) Uani 1 1 d U . . 
C60 C -0.1780(7) 0.5310(3) 0.0935(3) 0.0142(19) Uani 1 1 d . . . 
N1 N -0.1005(6) 0.2547(3) 0.3308(2) 0.0120(11) Uani 1 1 d U . . 
N2 N -0.0186(6) 0.3341(3) 0.3999(2) 0.0130(15) Uani 1 1 d U . . 
N3 N -0.0194(7) 0.2490(3) 0.4797(3) 0.0182(17) Uani 1 1 d . . . 
N4 N -0.2541(9) 0.2543(4) 0.4343(4) 0.0531(17) Uani 1 1 d U . . 
N5 N 0.5567(6) 0.3395(3) 0.0836(3) 0.0128(16) Uani 1 1 d . . . 
N6 N 0.3986(6) 0.2732(3) 0.1197(3) 0.0136(17) Uani 1 1 d . . . 
N7 N 0.3802(6) 0.7386(3) 0.3211(3) 0.0132(16) Uani 1 1 d . . . 
N8 N 0.4575(6) 0.6614(3) 0.3996(3) 0.0149(16) Uani 1 1 d . . . 
N9 N -0.1381(6) 0.7165(3) 0.1143(3) 0.0191(18) Uani 1 1 d . . . 
N10 N 0.0496(6) 0.6554(3) 0.0901(3) 0.0142(16) Uani 1 1 d . . . 
O1 O -0.3076(5) 0.2598(2) 0.5601(2) 0.0171(14) Uani 1 1 d . . . 
O2 O -0.1784(5) 0.2954(3) 0.6253(2) 0.0289(16) Uani 1 1 d . . . 
O3 O -0.1199(7) 0.3903(3) 0.5337(3) 0.048(2) Uani 1 1 d U . . 
O4 O -0.2521(7) 0.4527(3) 0.4895(3) 0.062(2) Uani 1 1 d U . . 
O5 O 0.1046(5) 0.3926(2) 0.2757(2) 0.0160(14) Uani 1 1 d . . . 
O6 O -0.0613(5) 0.4213(2) 0.2278(2) 0.0152(14) Uani 1 1 d . . . 
O7 O -0.2772(5) 0.4004(2) 0.2824(2) 0.0173(14) Uani 1 1 d . . . 
O8 O -0.2207(5) 0.4932(2) 0.3032(2) 0.0150(14) Uani 1 1 d . . . 
O9 O 0.2821(5) 0.4351(2) 0.2142(2) 0.0179(14) Uani 1 1 d . . . 
O10 O 0.4680(5) 0.4335(2) 0.1961(2) 0.0140(13) Uani 1 1 d U . . 
O11 O 0.2320(5) 0.4321(2) 0.0860(2) 0.0182(14) Uani 1 1 d . . . 
O12 O 0.3411(5) 0.5153(2) 0.1070(2) 0.0152(13) Uani 1 1 d . . . 
O13 O 0.4417(5) 0.5660(2) 0.2319(2) 0.0138(13) Uani 1 1 d U . . 
O14 O 0.6077(5) 0.5957(2) 0.2801(2) 0.0194(15) Uani 1 1 d . . . 
O15 O 0.2793(5) 0.5000(2) 0.3008(2) 0.0160(14) Uani 1 1 d . . . 
O16 O 0.2132(5) 0.5899(2) 0.2774(2) 0.0167(14) Uani 1 1 d . . . 
O17 O -0.0320(5) 0.5590(2) 0.1928(2) 0.0143(13) Uani 1 1 d . . . 
O18 O -0.2122(5) 0.5529(2) 0.2167(2) 0.0153(13) Uani 1 1 d . . . 
O19 O -0.1626(5) 0.4765(2) 0.1048(2) 0.0164(14) Uani 1 1 d . . . 
O20 O -0.2767(5) 0.5583(2) 0.0867(2) 0.0200(15) Uani 1 1 d . . . 
O21 O 0.0138(5) 0.5209(2) 0.2973(2) 0.0175(14) Uani 1 1 d . . . 
H21A H 0.0465 0.5519 0.3118 0.026 Uiso 1 1 d R . . 
H21B H 0.0177 0.4922 0.3181 0.026 Uiso 1 1 d R . . 
O22 O 0.0644(5) 0.4483(2) 0.1486(2) 0.0167(14) Uani 1 1 d . . . 
H22A H -0.0118 0.4508 0.1393 0.025 Uiso 1 1 d R . . 
H22B H 0.0849 0.4113 0.1499 0.025 Uiso 1 1 d R . . 
O23 O 0.2209(5) 0.5590(2) 0.1788(2) 0.0153(13) Uani 1 1 d U . . 
H23A H 0.1741 0.5879 0.1675 0.023 Uiso 1 1 d R . . 
H23B H 0.2402 0.5392 0.1543 0.023 Uiso 1 1 d R . . 
O24 O -0.2835(5) 0.4330(2) 0.1777(2) 0.0137(13) Uani 1 1 d U . . 
H24A H -0.3327 0.4055 0.1651 0.020 Uiso 1 1 d R . . 
H24B H -0.2207 0.4163 0.1942 0.020 Uiso 1 1 d R . . 
O25 O -0.4350(5) 0.5456(2) 0.1531(2) 0.0174(14) Uani 1 1 d . . . 
H25A H -0.5102 0.5392 0.1416 0.026 Uiso 1 1 d R . . 
H25B H -0.3922 0.5313 0.1321 0.026 Uiso 1 1 d R . . 
O26 O -0.4812(5) 0.4696(2) 0.3023(2) 0.0185(14) Uani 1 1 d . . . 
H26A H -0.4429 0.4846 0.3300 0.028 Uiso 1 1 d R . . 
H26B H -0.4838 0.4307 0.3056 0.028 Uiso 1 1 d R . . 
Cu5 Cu -0.04110(9) 0.24561(4) 0.40533(4) 0.0130(2) Uani 1 1 d . . . 
Cu6 Cu 0.55112(9) 0.25074(4) 0.09202(4) 0.0148(3) Uani 1 1 d . . . 
Eu1 Eu 0.11771(4) 0.493241(16) 0.230138(16) 0.00952(13) Uani 1 1 d . . . 
Eu3 Eu -0.37956(4) 0.497193(15) 0.233120(16) 0.01061(13) Uani 1 1 d . . . 
O35 O 0.4125(7) 0.2486(3) 0.0082(3) 0.053(2) Uani 1 1 d . . . 
O29 O -0.3059(8) 0.5612(3) 0.5238(4) 0.079(3) Uani 1 1 d . . . 
O32 O 0.7864(7) 0.6063(3) 0.3695(3) 0.049(2) Uani 1 1 d . . . 
O34 O 0.2517(9) 0.3995(3) 0.3757(3) 0.083(4) Uani 1 1 d . . . 
O30 O -0.0356(7) 0.3961(3) 0.6307(3) 0.054(2) Uani 1 1 d . . . 
O28 O -0.3499(7) 0.4992(3) 0.3952(3) 0.062(3) Uani 1 1 d . . . 
O31 O -0.2934(7) 0.6381(3) 0.0063(3) 0.058(3) Uani 1 1 d . . . 
O33 O 0.7610(8) 0.6543(4) 0.4691(4) 0.092(3) Uani 1 1 d . . . 
O27 O -0.6236(10) 0.3639(4) 0.3108(4) 0.111(4) Uani 1 1 d . . . 
 
loop_ 
 _atom_site_aniso_label 
 _atom_site_aniso_U_11 
 _atom_site_aniso_U_22 
 _atom_site_aniso_U_33 
 _atom_site_aniso_U_23 
 _atom_site_aniso_U_13 
 _atom_site_aniso_U_12 
C1 0.026(6) 0.010(4) 0.032(6) 0.002(4) 0.016(5) -0.001(4) 
C2 0.016(5) 0.020(4) 0.023(6) -0.001(4) -0.005(4) -0.005(4) 
C3 0.014(5) 0.061(7) 0.018(6) -0.002(5) 0.004(4) 0.004(5) 
C4 0.033(3) 0.034(3) 0.033(3) 0.0009(10) 0.0051(11) 0.0003(10) 
C5 0.023(5) 0.028(5) 0.020(6) -0.006(4) 0.010(4) -0.001(4) 
C6 0.018(5) 0.013(4) 0.024(6) -0.003(4) 0.008(4) -0.002(4) 
C7 0.046(2) 0.047(2) 0.047(2) 0.0008(7) 0.0080(8) 0.0005(7) 
C8 0.0579(19) 0.0593(19) 0.059(2) 0.0001(10) 0.0068(10) 0.0017(10) 
C9 0.075(5) 0.071(4) 0.067(6) -0.013(4) -0.011(4) 0.017(3) 
C10 0.060(2) 0.059(2) 0.060(2) 0.0005(10) 0.0088(10) 0.0016(10) 
C11 0.050(6) 0.044(6) 0.046(7) -0.004(5) 0.019(4) 0.002(4) 
C12 0.056(4) 0.056(4) 0.056(4) 0.0005(10) 0.0096(11) 0.0008(10) 
C13 0.015(2) 0.016(2) 0.015(2) 0.0002(10) 0.0026(10) 0.0002(10) 
C14 0.005(4) 0.013(4) 0.026(6) 0.009(4) 0.003(4) 0.001(3) 
C15 0.015(2) 0.014(2) 0.015(2) -0.0003(10) 0.0026(10) 0.0004(10) 
C16 0.017(5) 0.017(4) 0.013(5) -0.004(4) -0.006(4) 0.004(4) 
C17 0.013(5) 0.020(4) 0.023(6) -0.006(4) 0.002(4) 0.008(4) 
C18 0.0114(16) 0.0121(13) 0.0122(15) -0.0006(9) 0.0018(10) 0.0001(10) 
C19 0.0112(15) 0.0119(11) 0.0118(14) -0.0002(8) 0.0016(10) 0.0000(10) 
C20 0.0125(16) 0.0125(12) 0.0130(15) -0.0007(9) 0.0018(10) -0.0006(10) 
C21 0.014(5) 0.020(4) 0.021(6) -0.005(4) 0.002(4) -0.002(4) 
C22 0.018(5) 0.019(4) 0.012(5) -0.003(4) -0.007(4) -0.002(4) 
C23 0.004(4) 0.009(4) 0.018(5) -0.003(3) 0.001(4) 0.000(3) 
C24 0.015(2) 0.015(2) 0.014(2) -0.0007(10) 0.0025(10) 0.0000(10) 
C25 0.007(4) 0.016(4) 0.008(5) -0.001(3) -0.002(4) 0.005(4) 
C26 0.005(4) 0.011(3) 0.014(4) -0.001(3) -0.001(3) 0.002(3) 
C27 0.012(4) 0.018(3) 0.017(5) 0.004(3) 0.004(3) 0.003(3) 
C28 0.011(4) 0.017(3) 0.030(6) 0.003(3) 0.007(4) -0.004(3) 
C29 0.015(5) 0.011(4) 0.016(5) 0.003(4) 0.004(4) -0.002(4) 
C30 0.0123(18) 0.0121(18) 0.0130(18) 0.0005(10) 0.0020(10) 0.0002(10) 
C31 0.012(2) 0.012(2) 0.012(2) 0.0002(10) 0.0015(10) -0.0002(10) 
C32 0.020(5) 0.019(4) 0.015(5) 0.005(4) 0.012(4) 0.008(4) 
C33 0.018(5) 0.021(4) 0.016(5) 0.006(4) 0.008(4) 0.000(4) 
C34 0.010(2) 0.0104(19) 0.011(2) 0.0001(10) 0.0010(10) 0.0002(10) 
C35 0.011(5) 0.010(4) 0.019(5) 0.002(3) 0.004(4) 0.001(3) 
C36 0.0083(19) 0.0086(19) 0.0083(19) 0.0006(10) 0.0012(10) 0.0004(10) 
C37 0.006(4) 0.009(4) 0.020(5) -0.002(3) 0.006(4) 0.000(3) 
C38 0.007(4) 0.015(4) 0.016(5) 0.003(3) -0.002(4) 0.003(3) 
C39 0.020(5) 0.018(4) 0.024(6) 0.004(4) -0.001(4) -0.005(4) 
C40 0.037(6) 0.015(4) 0.016(5) 0.007(4) 0.002(5) 0.001(4) 
C41 0.018(5) 0.021(5) 0.023(6) 0.001(4) -0.006(4) -0.008(4) 
C42 0.011(2) 0.0119(19) 0.012(2) -0.0001(10) 0.0021(10) 0.0006(10) 
C43 0.007(4) 0.012(4) 0.014(5) 0.006(3) 0.001(4) 0.004(3) 
C44 0.017(5) 0.012(4) 0.027(6) -0.001(4) -0.003(4) 0.004(4) 
C45 0.014(5) 0.012(4) 0.018(5) 0.002(4) 0.003(4) 0.005(4) 
C46 0.014(5) 0.016(4) 0.018(5) -0.004(4) 0.002(4) 0.001(4) 
C47 0.009(4) 0.006(4) 0.023(6) -0.005(3) 0.002(4) -0.001(3) 
C48 0.0097(19) 0.0100(19) 0.0099(19) 0.0006(10) 0.0023(10) 0.0000(10) 
C49 0.015(5) 0.013(4) 0.015(5) -0.007(4) 0.002(4) -0.002(4) 
C50 0.0095(19) 0.0095(19) 0.010(2) 0.0003(10) 0.0012(10) -0.0002(10) 
C51 0.010(5) 0.017(4) 0.015(5) -0.003(4) 0.005(4) -0.001(4) 
C52 0.030(6) 0.018(4) 0.027(6) 0.002(4) 0.016(5) 0.009(4) 
C53 0.019(2) 0.018(2) 0.020(2) 0.0005(10) 0.0033(10) -0.0001(10) 
C54 0.013(2) 0.012(2) 0.013(2) -0.0003(10) 0.0018(10) -0.0004(10) 
C55 0.010(4) 0.011(4) 0.012(5) 0.000(3) 0.005(4) -0.001(3) 
C56 0.015(5) 0.024(5) 0.028(6) 0.010(4) 0.003(4) -0.004(4) 
C57 0.021(5) 0.014(4) 0.013(5) 0.004(4) 0.005(4) 0.007(4) 
C58 0.019(5) 0.012(4) 0.022(6) 0.002(4) -0.004(4) -0.003(4) 
C59 0.010(2) 0.0105(19) 0.011(2) 0.0002(10) 0.0011(10) 0.0004(10) 
C60 0.015(5) 0.014(4) 0.013(5) -0.006(3) 0.002(4) 0.000(4) 
N1 0.0116(15) 0.0119(11) 0.0127(14) -0.0001(8) 0.0024(10) 0.0002(10) 
N2 0.0128(18) 0.0129(17) 0.0131(18) 0.0001(10) 0.0017(10) 0.0009(10) 
N3 0.025(4) 0.011(3) 0.020(5) 0.002(3) 0.009(4) 0.000(3) 
N4 0.0541(18) 0.0526(19) 0.0523(19) -0.0030(10) 0.0081(10) -0.0005(10) 
N5 0.004(4) 0.018(4) 0.016(4) 0.006(3) 0.001(3) 0.000(3) 
N6 0.012(4) 0.006(3) 0.020(4) -0.004(3) -0.006(3) 0.000(3) 
N7 0.007(4) 0.008(3) 0.023(4) 0.004(3) -0.002(3) -0.003(3) 
N8 0.014(4) 0.018(4) 0.014(4) -0.002(3) 0.004(3) -0.001(3) 
N9 0.020(4) 0.006(3) 0.034(5) -0.001(3) 0.012(4) -0.002(3) 
N10 0.008(4) 0.021(4) 0.014(4) 0.008(3) 0.001(3) 0.005(3) 
O1 0.012(3) 0.016(3) 0.025(4) -0.005(3) 0.007(3) -0.005(3) 
O2 0.017(4) 0.049(4) 0.021(4) -0.012(3) 0.002(3) -0.016(3) 
O3 0.051(3) 0.047(2) 0.047(3) -0.0030(18) 0.0097(19) -0.0026(18) 
O4 0.064(3) 0.059(3) 0.065(3) 0.0005(19) 0.0141(19) 0.0044(19) 
O5 0.013(3) 0.011(3) 0.025(4) 0.004(2) 0.003(3) 0.000(2) 
O6 0.013(3) 0.013(3) 0.019(4) 0.005(2) -0.001(3) -0.003(2) 
O7 0.013(3) 0.015(3) 0.024(4) -0.002(3) 0.004(3) -0.001(3) 
O8 0.006(3) 0.012(3) 0.027(4) 0.001(2) 0.000(3) 0.001(2) 
O9 0.009(3) 0.020(3) 0.024(4) -0.006(3) 0.002(3) 0.006(3) 
O10 0.0138(15) 0.0133(15) 0.0148(15) -0.0012(10) 0.0018(10) -0.0008(10) 
O11 0.005(3) 0.014(3) 0.034(4) 0.000(3) -0.001(3) 0.001(2) 
O12 0.013(3) 0.012(3) 0.022(4) -0.002(2) 0.008(3) 0.005(2) 
O13 0.0131(15) 0.0139(15) 0.0144(15) -0.0005(10) 0.0019(10) 0.0004(10) 
O14 0.013(3) 0.016(3) 0.027(4) 0.000(3) -0.004(3) 0.004(3) 
O15 0.010(3) 0.011(3) 0.027(4) 0.002(2) 0.004(3) 0.001(2) 
O16 0.013(3) 0.011(3) 0.025(4) 0.000(3) 0.000(3) 0.001(2) 
O17 0.009(3) 0.013(3) 0.021(4) 0.003(2) 0.003(3) 0.006(2) 
O18 0.012(3) 0.018(3) 0.017(4) 0.006(2) 0.004(3) -0.003(2) 
O19 0.009(3) 0.011(3) 0.029(4) -0.003(3) 0.002(3) 0.000(2) 
O20 0.012(3) 0.019(3) 0.028(4) -0.002(3) 0.002(3) -0.004(3) 
O21 0.016(3) 0.013(3) 0.024(4) -0.003(3) 0.007(3) -0.008(3) 
O22 0.008(3) 0.018(3) 0.023(4) 0.002(3) -0.003(3) 0.002(2) 
O23 0.015(2) 0.0131(18) 0.018(2) -0.0001(16) 0.0030(16) 0.0033(16) 
O24 0.011(2) 0.0133(18) 0.015(2) -0.0002(16) -0.0009(16) -0.0005(16) 
O25 0.010(3) 0.024(3) 0.020(4) -0.002(3) 0.008(3) 0.005(3) 
O26 0.012(3) 0.014(3) 0.030(4) -0.001(3) 0.004(3) 0.001(3) 
Cu5 0.0124(6) 0.0100(5) 0.0165(6) -0.0003(4) 0.0017(5) 0.0035(4) 
Cu6 0.0146(6) 0.0100(5) 0.0209(7) 0.0020(4) 0.0065(5) 0.0041(4) 
Eu1 0.0050(2) 0.0082(2) 0.0154(3) 0.00041(17) 0.00173(18) 0.00082(16) 
Eu3 0.0055(2) 0.0086(2) 0.0179(3) -0.00009(17) 0.00250(19) -0.00024(16) 
O35 0.038(5) 0.046(4) 0.068(6) -0.002(4) -0.014(4) 0.004(4) 
O29 0.053(6) 0.054(5) 0.119(9) 0.000(5) -0.018(6) -0.007(5) 
O32 0.057(6) 0.028(4) 0.058(6) -0.016(3) -0.007(5) 0.019(4) 
O34 0.107(8) 0.054(5) 0.077(7) 0.029(5) -0.020(6) -0.043(5) 
O30 0.057(6) 0.051(4) 0.058(6) -0.031(4) 0.030(5) -0.029(4) 
O28 0.044(6) 0.074(6) 0.068(7) -0.007(4) 0.012(5) 0.003(4) 
O31 0.058(6) 0.040(4) 0.063(6) 0.016(4) -0.030(5) -0.012(4) 
O33 0.062(7) 0.095(7) 0.111(9) 0.019(6) -0.012(6) -0.028(6) 
O27 0.110(10) 0.070(6) 0.143(11) 0.014(6) -0.011(8) -0.033(6) 
 
_geom_special_details 
; 
 All esds (except the esd in the dihedral angle between two l.s. planes) 
 are estimated using the full covariance matrix.  The cell esds are taken 
 into account individually in the estimation of esds in distances, angles 
 and torsion angles; correlations between esds in cell parameters are only 
 used when they are defined by crystal symmetry.  An approximate (isotropic) 
 treatment of cell esds is used for estimating esds involving l.s. planes. 
; 
 
loop_ 
 _geom_bond_atom_site_label_1 
 _geom_bond_atom_site_label_2 
 _geom_bond_distance 
 _geom_bond_site_symmetry_2 
 _geom_bond_publ_flag 
C1 O2 1.255(10) . ? 
C1 O1 1.257(10) . ? 
C1 C2 1.512(13) . ? 
C2 C3 1.384(11) . ? 
C2 C6 1.411(12) . ? 
C3 C4 1.403(13) . ? 
C3 H3 0.9300 . ? 
C4 C5 1.412(13) . ? 
C4 H4 0.9300 . ? 
C5 N3 1.342(10) . ? 
C5 H5 0.9300 . ? 
C6 N3 1.354(11) . ? 
C6 C7 1.518(13) . ? 
C7 N4 1.324(13) . ? 
C7 C11 1.400(14) . ? 
C8 C9 1.343(15) . ? 
C8 N4 1.357(13) . ? 
C8 H8 0.9300 . ? 
C9 C10 1.411(15) . ? 
C9 H9 0.9300 . ? 
C10 C11 1.423(15) . ? 
C10 H10 0.9300 . ? 
C11 C12 1.465(15) . ? 
C12 O3 1.250(12) . ? 
C12 O4 1.275(13) . ? 
C13 O7 1.256(9) . ? 
C13 O8 1.275(8) . ? 
C13 C14 1.531(11) . ? 
C13 Eu3 2.914(8) . ? 
C14 C18 1.384(10) . ? 
C14 C15 1.409(11) . ? 
C15 C16 1.374(10) . ? 
C15 H15 0.9300 . ? 
C16 C17 1.392(10) . ? 
C16 H16 0.9300 . ? 
C17 N2 1.338(10) . ? 
C17 H17 0.9300 . ? 
C18 N2 1.351(9) . ? 
C18 C19 1.466(10) . ? 
C19 N1 1.364(9) . ? 
C19 C23 1.390(11) . ? 
C20 N1 1.354(9) . ? 
C20 C21 1.399(11) . ? 
C20 H20 0.9300 . ? 
C21 C22 1.390(11) . ? 
C21 H21 0.9300 . ? 
C22 C23 1.398(10) . ? 
C22 H22 0.9300 . ? 
C23 C24 1.526(10) . ? 
C24 O6 1.252(9) . ? 
C24 O5 1.273(9) . ? 
C24 Eu1 2.952(8) . ? 
C25 O9 1.237(9) . ? 
C25 O10 1.265(9) . ? 
C25 C26 1.543(10) . ? 
C26 C30 1.364(11) . ? 
C26 C27 1.399(11) . ? 
C27 C28 1.366(10) . ? 
C27 H27 0.9300 . ? 
C28 C29 1.377(12) . ? 
C28 H28 0.9300 . ? 
C29 N6 1.321(10) . ? 
C29 H29 0.9300 . ? 
C30 N6 1.360(9) . ? 
C30 C31 1.509(11) . ? 
C31 N5 1.344(10) . ? 
C31 C35 1.409(10) . ? 
C32 N5 1.338(10) . ? 
C32 C33 1.373(10) . ? 
C32 H32 0.9300 . ? 
C33 C34 1.411(11) . ? 
C33 H33 0.9300 . ? 
C34 C35 1.376(11) . ? 
C34 H34 0.9300 . ? 
C35 C36 1.497(11) . ? 
C36 O11 1.244(9) . ? 
C36 O12 1.278(8) . ? 
C37 O16 1.235(9) . ? 
C37 O15 1.289(8) . ? 
C37 C38 1.503(11) . ? 
C37 Eu1 2.916(8) . ? 
C38 C39 1.385(11) . ? 
C38 C42 1.403(10) . ? 
C39 C40 1.367(11) . ? 
C39 H39 0.9300 . ? 
C40 C41 1.388(10) . ? 
C40 H40 0.9300 . ? 
C41 N8 1.316(10) . ? 
C41 H41 0.9300 . ? 
C42 N8 1.367(10) . ? 
C42 C43 1.511(11) . ? 
C43 N7 1.357(9) . ? 
C43 C47 1.371(11) . ? 
C44 N7 1.334(10) . ? 
C44 C45 1.387(12) . ? 
C44 H44 0.9300 . ? 
C45 C46 1.399(10) . ? 
C45 H45 0.9300 . ? 
C46 C47 1.383(11) . ? 
C46 H46 0.9300 . ? 
C47 C48 1.511(10) . ? 
C48 O14 1.256(9) . ? 
C48 O13 1.284(8) . ? 
C48 Eu3 2.915(7) 1_655 ? 
C49 O18 1.250(10) . ? 
C49 O17 1.252(10) . ? 
C49 C50 1.530(10) . ? 
C50 C54 1.383(11) . ? 
C50 C51 1.393(11) . ? 
C51 C52 1.389(10) . ? 
C51 H51 0.9300 . ? 
C52 C53 1.393(12) . ? 
C52 H52 0.9300 . ? 
C53 N9 1.324(11) . ? 
C53 H53 0.9300 . ? 
C54 N9 1.361(9) . ? 
C54 C55 1.501(11) . ? 
C55 N10 1.346(10) . ? 
C55 C59 1.391(10) . ? 
C56 N10 1.350(11) . ? 
C56 C57 1.391(10) . ? 
C56 H56 0.9300 . ? 
C57 C58 1.386(11) . ? 
C57 H57 0.9300 . ? 
C58 C59 1.379(12) . ? 
C58 H58 0.9300 . ? 
C59 C60 1.526(11) . ? 
C60 O20 1.258(9) . ? 
C60 O19 1.263(9) . ? 
N1 Cu5 2.048(6) . ? 
N2 Cu5 2.004(6) . ? 
N3 Cu5 2.008(7) . ? 
N4 Cu5 2.654(10) . ? 
N5 Cu6 2.000(6) . ? 
N6 Cu6 2.049(7) . ? 
N7 Cu6 2.391(7) 2_655 ? 
N8 Cu6 2.014(6) 2_655 ? 
N9 Cu5 2.268(7) 2 ? 
N10 Cu5 2.024(6) 2 ? 
O1 Cu6 1.950(6) 4_466 ? 
O5 Eu1 2.587(5) . ? 
O6 Eu1 2.575(5) . ? 
O7 Eu3 2.708(5) . ? 
O8 Eu3 2.408(5) . ? 
O9 Eu1 2.362(5) . ? 
O10 Eu3 2.336(5) 1_655 ? 
O13 Eu3 2.533(5) 1_655 ? 
O14 Eu3 2.565(5) 1_655 ? 
O15 Eu1 2.441(5) . ? 
O16 Eu1 2.656(5) . ? 
O17 Eu1 2.346(5) . ? 
O18 Eu3 2.364(5) . ? 
O21 Eu1 2.409(6) . ? 
O21 H21A 0.8541 . ? 
O21 H21B 0.8536 . ? 
O22 Eu1 2.429(5) . ? 
O22 H22A 0.8588 . ? 
O22 H22B 0.8600 . ? 
O23 Eu1 2.450(5) . ? 
O23 H23A 0.8604 . ? 
O23 H23B 0.8606 . ? 
O24 Eu3 2.458(5) . ? 
O24 H24A 0.8637 . ? 
O24 H24B 0.8628 . ? 
O25 Eu3 2.429(5) . ? 
O25 H25A 0.8682 . ? 
O25 H25B 0.8686 . ? 
O26 Eu3 2.441(6) . ? 
O26 H26A 0.8763 . ? 
O26 H26B 0.8749 . ? 
Cu5 N10 2.024(6) 2_545 ? 
Cu5 N9 2.268(7) 2_545 ? 
Cu6 O1 1.950(6) 4_665 ? 
Cu6 N8 2.014(6) 2_645 ? 
Cu6 N7 2.391(7) 2_645 ? 
Cu6 O35 2.559(7) . ? 
Eu3 O10 2.336(5) 1_455 ? 
Eu3 O13 2.533(5) 1_455 ? 
Eu3 O14 2.565(5) 1_455 ? 
Eu3 C48 2.915(7) 1_455 ? 
 
loop_ 
 _geom_angle_atom_site_label_1 
 _geom_angle_atom_site_label_2 
 _geom_angle_atom_site_label_3 
 _geom_angle 
 _geom_angle_site_symmetry_1 
 _geom_angle_site_symmetry_3 
 _geom_angle_publ_flag 
O2 C1 O1 128.2(9) . . ? 
O2 C1 C2 116.7(8) . . ? 
O1 C1 C2 114.8(8) . . ? 
C3 C2 C6 119.2(9) . . ? 
C3 C2 C1 117.0(9) . . ? 
C6 C2 C1 123.4(8) . . ? 
C2 C3 C4 119.8(10) . . ? 
C2 C3 H3 120.1 . . ? 
C4 C3 H3 120.1 . . ? 
C3 C4 C5 118.2(9) . . ? 
C3 C4 H4 120.9 . . ? 
C5 C4 H4 120.9 . . ? 
N3 C5 C4 121.5(9) . . ? 
N3 C5 H5 119.2 . . ? 
C4 C5 H5 119.2 . . ? 
N3 C6 C2 120.7(8) . . ? 
N3 C6 C7 114.4(9) . . ? 
C2 C6 C7 124.6(9) . . ? 
N4 C7 C11 124.3(11) . . ? 
N4 C7 C6 109.3(9) . . ? 
C11 C7 C6 126.3(10) . . ? 
C9 C8 N4 124.3(12) . . ? 
C9 C8 H8 117.8 . . ? 
N4 C8 H8 117.8 . . ? 
C8 C9 C10 116.5(13) . . ? 
C8 C9 H9 121.7 . . ? 
C10 C9 H9 121.7 . . ? 
C9 C10 C11 121.2(11) . . ? 
C9 C10 H10 119.4 . . ? 
C11 C10 H10 119.4 . . ? 
C7 C11 C10 114.3(10) . . ? 
C7 C11 C12 125.3(11) . . ? 
C10 C11 C12 119.9(10) . . ? 
O3 C12 O4 125.9(11) . . ? 
O3 C12 C11 118.6(11) . . ? 
O4 C12 C11 115.3(11) . . ? 
O7 C13 O8 122.5(7) . . ? 
O7 C13 C14 119.9(7) . . ? 
O8 C13 C14 117.5(7) . . ? 
O7 C13 Eu3 68.1(4) . . ? 
O8 C13 Eu3 54.5(4) . . ? 
C14 C13 Eu3 171.8(5) . . ? 
C18 C14 C15 117.7(7) . . ? 
C18 C14 C13 124.3(7) . . ? 
C15 C14 C13 117.8(7) . . ? 
C16 C15 C14 119.7(7) . . ? 
C16 C15 H15 120.1 . . ? 
C14 C15 H15 120.1 . . ? 
C15 C16 C17 118.6(7) . . ? 
C15 C16 H16 120.7 . . ? 
C17 C16 H16 120.7 . . ? 
N2 C17 C16 121.7(8) . . ? 
N2 C17 H17 119.2 . . ? 
C16 C17 H17 119.2 . . ? 
N2 C18 C14 121.4(7) . . ? 
N2 C18 C19 113.1(6) . . ? 
C14 C18 C19 125.5(7) . . ? 
N1 C19 C23 121.9(7) . . ? 
N1 C19 C18 113.2(7) . . ? 
C23 C19 C18 124.2(7) . . ? 
N1 C20 C21 121.5(7) . . ? 
N1 C20 H20 119.3 . . ? 
C21 C20 H20 119.3 . . ? 
C22 C21 C20 119.2(7) . . ? 
C22 C21 H21 120.4 . . ? 
C20 C21 H21 120.4 . . ? 
C21 C22 C23 119.4(8) . . ? 
C21 C22 H22 120.3 . . ? 
C23 C22 H22 120.3 . . ? 
C19 C23 C22 118.3(7) . . ? 
C19 C23 C24 121.9(7) . . ? 
C22 C23 C24 119.4(8) . . ? 
O6 C24 O5 121.4(7) . . ? 
O6 C24 C23 121.8(7) . . ? 
O5 C24 C23 116.8(7) . . ? 
O6 C24 Eu1 60.4(4) . . ? 
O5 C24 Eu1 61.0(4) . . ? 
C23 C24 Eu1 175.7(6) . . ? 
O9 C25 O10 126.2(7) . . ? 
O9 C25 C26 118.3(7) . . ? 
O10 C25 C26 115.5(7) . . ? 
C30 C26 C27 119.6(7) . . ? 
C30 C26 C25 123.7(7) . . ? 
C27 C26 C25 116.2(7) . . ? 
C28 C27 C26 118.7(8) . . ? 
C28 C27 H27 120.7 . . ? 
C26 C27 H27 120.7 . . ? 
C27 C28 C29 118.7(8) . . ? 
C27 C28 H28 120.6 . . ? 
C29 C28 H28 120.6 . . ? 
N6 C29 C28 122.7(7) . . ? 
N6 C29 H29 118.7 . . ? 
C28 C29 H29 118.7 . . ? 
N6 C30 C26 120.3(8) . . ? 
N6 C30 C31 111.7(7) . . ? 
C26 C30 C31 127.9(7) . . ? 
N5 C31 C35 121.4(8) . . ? 
N5 C31 C30 113.7(6) . . ? 
C35 C31 C30 124.8(8) . . ? 
N5 C32 C33 121.5(8) . . ? 
N5 C32 H32 119.3 . . ? 
C33 C32 H32 119.3 . . ? 
C32 C33 C34 118.4(8) . . ? 
C32 C33 H33 120.8 . . ? 
C34 C33 H33 120.8 . . ? 
C35 C34 C33 120.4(7) . . ? 
C35 C34 H34 119.8 . . ? 
C33 C34 H34 119.8 . . ? 
C34 C35 C31 117.4(8) . . ? 
C34 C35 C36 118.6(6) . . ? 
C31 C35 C36 123.8(7) . . ? 
O11 C36 O12 126.7(7) . . ? 
O11 C36 C35 117.3(6) . . ? 
O12 C36 C35 115.9(7) . . ? 
O16 C37 O15 121.6(7) . . ? 
O16 C37 C38 122.8(6) . . ? 
O15 C37 C38 115.6(7) . . ? 
O16 C37 Eu1 65.6(4) . . ? 
O15 C37 Eu1 56.0(4) . . ? 
C38 C37 Eu1 169.8(5) . . ? 
C39 C38 C42 117.8(7) . . ? 
C39 C38 C37 118.3(7) . . ? 
C42 C38 C37 123.4(7) . . ? 
C40 C39 C38 121.4(8) . . ? 
C40 C39 H39 119.3 . . ? 
C38 C39 H39 119.3 . . ? 
C39 C40 C41 117.9(8) . . ? 
C39 C40 H40 121.0 . . ? 
C41 C40 H40 121.0 . . ? 
N8 C41 C40 122.0(8) . . ? 
N8 C41 H41 119.0 . . ? 
C40 C41 H41 119.0 . . ? 
N8 C42 C38 119.6(7) . . ? 
N8 C42 C43 115.2(6) . . ? 
C38 C42 C43 125.1(7) . . ? 
N7 C43 C47 122.4(7) . . ? 
N7 C43 C42 113.2(7) . . ? 
C47 C43 C42 124.2(7) . . ? 
N7 C44 C45 122.3(7) . . ? 
N7 C44 H44 118.9 . . ? 
C45 C44 H44 118.9 . . ? 
C44 C45 C46 118.5(8) . . ? 
C44 C45 H45 120.8 . . ? 
C46 C45 H45 120.8 . . ? 
C47 C46 C45 119.1(8) . . ? 
C47 C46 H46 120.5 . . ? 
C45 C46 H46 120.5 . . ? 
C43 C47 C46 118.8(7) . . ? 
C43 C47 C48 122.9(7) . . ? 
C46 C47 C48 117.8(8) . . ? 
O14 C48 O13 121.3(7) . . ? 
O14 C48 C47 119.3(7) . . ? 
O13 C48 C47 119.4(7) . . ? 
O14 C48 Eu3 61.5(4) . 1_655 ? 
O13 C48 Eu3 60.1(4) . 1_655 ? 
C47 C48 Eu3 171.8(6) . 1_655 ? 
O18 C49 O17 126.6(7) . . ? 
O18 C49 C50 116.8(7) . . ? 
O17 C49 C50 116.5(7) . . ? 
C54 C50 C51 119.1(7) . . ? 
C54 C50 C49 122.5(7) . . ? 
C51 C50 C49 118.3(7) . . ? 
C52 C51 C50 119.4(8) . . ? 
C52 C51 H51 120.3 . . ? 
C50 C51 H51 120.3 . . ? 
C51 C52 C53 117.0(8) . . ? 
C51 C52 H52 121.5 . . ? 
C53 C52 H52 121.5 . . ? 
N9 C53 C52 124.9(8) . . ? 
N9 C53 H53 117.5 . . ? 
C52 C53 H53 117.5 . . ? 
N9 C54 C50 122.1(8) . . ? 
N9 C54 C55 111.9(7) . . ? 
C50 C54 C55 126.0(7) . . ? 
N10 C55 C59 121.5(8) . . ? 
N10 C55 C54 113.5(6) . . ? 
C59 C55 C54 124.9(7) . . ? 
N10 C56 C57 122.8(8) . . ? 
N10 C56 H56 118.6 . . ? 
C57 C56 H56 118.6 . . ? 
C58 C57 C56 117.4(8) . . ? 
C58 C57 H57 121.3 . . ? 
C56 C57 H57 121.3 . . ? 
C59 C58 C57 120.5(7) . . ? 
C59 C58 H58 119.8 . . ? 
C57 C58 H58 119.8 . . ? 
C58 C59 C55 118.8(8) . . ? 
C58 C59 C60 118.7(6) . . ? 
C55 C59 C60 122.4(7) . . ? 
O20 C60 O19 126.1(7) . . ? 
O20 C60 C59 117.2(6) . . ? 
O19 C60 C59 116.6(7) . . ? 
C20 N1 C19 118.7(7) . . ? 
C20 N1 Cu5 126.5(5) . . ? 
C19 N1 Cu5 110.7(5) . . ? 
C17 N2 C18 119.6(6) . . ? 
C17 N2 Cu5 126.2(6) . . ? 
C18 N2 Cu5 111.6(5) . . ? 
C5 N3 C6 120.6(8) . . ? 
C5 N3 Cu5 117.4(6) . . ? 
C6 N3 Cu5 120.9(6) . . ? 
C7 N4 C8 117.5(10) . . ? 
C7 N4 Cu5 93.4(8) . . ? 
C8 N4 Cu5 127.5(8) . . ? 
C32 N5 C31 120.7(6) . . ? 
C32 N5 Cu6 123.1(6) . . ? 
C31 N5 Cu6 114.5(5) . . ? 
C29 N6 C30 119.3(8) . . ? 
C29 N6 Cu6 124.6(5) . . ? 
C30 N6 Cu6 111.4(5) . . ? 
C44 N7 C43 118.6(7) . . ? 
C44 N7 Cu6 127.5(5) . 2_655 ? 
C43 N7 Cu6 104.8(5) . 2_655 ? 
C41 N8 C42 120.9(7) . . ? 
C41 N8 Cu6 119.1(6) . 2_655 ? 
C42 N8 Cu6 115.8(5) . 2_655 ? 
C53 N9 C54 117.3(8) . . ? 
C53 N9 Cu5 124.0(5) . 2 ? 
C54 N9 Cu5 105.8(5) . 2 ? 
C55 N10 C56 118.9(7) . . ? 
C55 N10 Cu5 117.1(5) . 2 ? 
C56 N10 Cu5 121.2(6) . 2 ? 
C1 O1 Cu6 124.5(6) . 4_466 ? 
C24 O5 Eu1 93.5(4) . . ? 
C24 O6 Eu1 94.6(5) . . ? 
C13 O7 Eu3 86.4(4) . . ? 
C13 O8 Eu3 100.0(5) . . ? 
C25 O9 Eu1 164.2(6) . . ? 
C25 O10 Eu3 148.9(5) . 1_655 ? 
C48 O13 Eu3 93.8(4) . 1_655 ? 
C48 O14 Eu3 93.0(4) . 1_655 ? 
C37 O15 Eu1 98.0(4) . . ? 
C37 O16 Eu1 89.3(4) . . ? 
C49 O17 Eu1 143.2(6) . . ? 
C49 O18 Eu3 162.9(6) . . ? 
Eu1 O21 H21A 109.6 . . ? 
Eu1 O21 H21B 109.5 . . ? 
H21A O21 H21B 109.2 . . ? 
Eu1 O22 H22A 109.7 . . ? 
Eu1 O22 H22B 109.6 . . ? 
H22A O22 H22B 108.9 . . ? 
Eu1 O23 H23A 109.6 . . ? 
Eu1 O23 H23B 109.8 . . ? 
H23A O23 H23B 108.8 . . ? 
Eu3 O24 H24A 110.1 . . ? 
Eu3 O24 H24B 109.7 . . ? 
H24A O24 H24B 108.7 . . ? 
Eu3 O25 H25A 110.4 . . ? 
Eu3 O25 H25B 109.9 . . ? 
H25A O25 H25B 108.4 . . ? 
Eu3 O26 H26A 110.2 . . ? 
Eu3 O26 H26B 111.0 . . ? 
H26A O26 H26B 108.1 . . ? 
N2 Cu5 N3 92.4(3) . . ? 
N2 Cu5 N10 175.3(3) . 2_545 ? 
N3 Cu5 N10 88.5(3) . 2_545 ? 
N2 Cu5 N1 81.6(2) . . ? 
N3 Cu5 N1 165.6(3) . . ? 
N10 Cu5 N1 98.6(3) 2_545 . ? 
N2 Cu5 N9 97.9(3) . 2_545 ? 
N3 Cu5 N9 106.2(3) . 2_545 ? 
N10 Cu5 N9 77.4(3) 2_545 2_545 ? 
N1 Cu5 N9 87.6(3) . 2_545 ? 
N2 Cu5 N4 94.7(3) . . ? 
N3 Cu5 N4 70.5(3) . . ? 
N10 Cu5 N4 90.0(3) 2_545 . ? 
N1 Cu5 N4 96.9(3) . . ? 
N9 Cu5 N4 167.2(2) 2_545 . ? 
O1 Cu6 N5 91.4(3) 4_665 . ? 
O1 Cu6 N8 89.3(3) 4_665 2_645 ? 
N5 Cu6 N8 179.1(3) . 2_645 ? 
O1 Cu6 N6 171.6(2) 4_665 . ? 
N5 Cu6 N6 81.0(3) . . ? 
N8 Cu6 N6 98.2(3) 2_645 . ? 
O1 Cu6 N7 105.7(2) 4_665 2_645 ? 
N5 Cu6 N7 102.5(2) . 2_645 ? 
N8 Cu6 N7 77.8(2) 2_645 2_645 ? 
N6 Cu6 N7 79.7(2) . 2_645 ? 
O1 Cu6 O35 91.4(3) 4_665 . ? 
N5 Cu6 O35 86.6(2) . . ? 
N8 Cu6 O35 92.8(2) 2_645 . ? 
N6 Cu6 O35 84.5(3) . . ? 
N7 Cu6 O35 160.2(2) 2_645 . ? 
O17 Eu1 O9 142.8(2) . . ? 
O17 Eu1 O21 76.48(19) . . ? 
O9 Eu1 O21 140.67(19) . . ? 
O17 Eu1 O22 78.71(18) . . ? 
O9 Eu1 O22 71.98(19) . . ? 
O21 Eu1 O22 136.39(18) . . ? 
O17 Eu1 O15 134.48(17) . . ? 
O9 Eu1 O15 70.76(19) . . ? 
O21 Eu1 O15 76.98(19) . . ? 
O22 Eu1 O15 142.73(19) . . ? 
O17 Eu1 O23 75.54(18) . . ? 
O9 Eu1 O23 76.47(19) . . ? 
O21 Eu1 O23 127.92(17) . . ? 
O22 Eu1 O23 78.17(18) . . ? 
O15 Eu1 O23 92.99(18) . . ? 
O17 Eu1 O6 82.69(17) . . ? 
O9 Eu1 O6 106.71(18) . . ? 
O21 Eu1 O6 72.79(18) . . ? 
O22 Eu1 O6 68.91(18) . . ? 
O15 Eu1 O6 122.86(17) . . ? 
O23 Eu1 O6 143.45(17) . . ? 
O17 Eu1 O5 131.42(18) . . ? 
O9 Eu1 O5 73.53(19) . . ? 
O21 Eu1 O5 77.61(18) . . ? 
O22 Eu1 O5 93.21(17) . . ? 
O15 Eu1 O5 76.49(16) . . ? 
O23 Eu1 O5 150.00(18) . . ? 
O6 Eu1 O5 50.48(16) . . ? 
O17 Eu1 O16 84.84(17) . . ? 
O9 Eu1 O16 105.53(18) . . ? 
O21 Eu1 O16 68.31(18) . . ? 
O22 Eu1 O16 143.51(18) . . ? 
O15 Eu1 O16 51.01(15) . . ? 
O23 Eu1 O16 66.20(18) . . ? 
O6 Eu1 O16 140.92(18) . . ? 
O5 Eu1 O16 121.61(17) . . ? 
O17 Eu1 C37 109.19(19) . . ? 
O9 Eu1 C37 88.8(2) . . ? 
O21 Eu1 C37 70.1(2) . . ? 
O22 Eu1 C37 153.0(2) . . ? 
O15 Eu1 C37 25.97(17) . . ? 
O23 Eu1 C37 79.1(2) . . ? 
O6 Eu1 C37 136.5(2) . . ? 
O5 Eu1 C37 99.38(19) . . ? 
O16 Eu1 C37 25.05(17) . . ? 
O17 Eu1 C24 107.1(2) . . ? 
O9 Eu1 C24 90.0(2) . . ? 
O21 Eu1 C24 74.0(2) . . ? 
O22 Eu1 C24 79.8(2) . . ? 
O15 Eu1 C24 100.2(2) . . ? 
O23 Eu1 C24 156.9(2) . . ? 
O6 Eu1 C24 25.00(18) . . ? 
O5 Eu1 C24 25.49(19) . . ? 
O16 Eu1 C24 136.4(2) . . ? 
C37 Eu1 C24 119.9(2) . . ? 
O10 Eu3 O18 142.6(2) 1_455 . ? 
O10 Eu3 O8 136.56(17) 1_455 . ? 
O18 Eu3 O8 69.76(18) . . ? 
O10 Eu3 O25 79.36(18) 1_455 . ? 
O18 Eu3 O25 72.18(19) . . ? 
O8 Eu3 O25 141.67(19) . . ? 
O10 Eu3 O26 77.12(19) 1_455 . ? 
O18 Eu3 O26 140.18(18) . . ? 
O8 Eu3 O26 75.92(19) . . ? 
O25 Eu3 O26 136.35(18) . . ? 
O10 Eu3 O24 75.17(19) 1_455 . ? 
O18 Eu3 O24 75.34(18) . . ? 
O8 Eu3 O24 97.05(18) . . ? 
O25 Eu3 O24 77.42(17) . . ? 
O26 Eu3 O24 129.52(17) . . ? 
O10 Eu3 O13 80.47(17) 1_455 1_455 ? 
O18 Eu3 O13 109.66(17) . 1_455 ? 
O8 Eu3 O13 121.55(17) . 1_455 ? 
O25 Eu3 O13 68.10(18) . 1_455 ? 
O26 Eu3 O13 72.09(17) . 1_455 ? 
O24 Eu3 O13 140.77(17) . 1_455 ? 
O10 Eu3 O14 130.09(18) 1_455 1_455 ? 
O18 Eu3 O14 75.69(19) . 1_455 ? 
O8 Eu3 O14 74.18(16) . 1_455 ? 
O25 Eu3 O14 92.33(17) . 1_455 ? 
O26 Eu3 O14 76.05(18) . 1_455 ? 
O24 Eu3 O14 150.99(18) . 1_455 ? 
O13 Eu3 O14 51.46(16) 1_455 1_455 ? 
O10 Eu3 O7 87.41(16) 1_455 . ? 
O18 Eu3 O7 102.97(17) . . ? 
O8 Eu3 O7 51.00(15) . . ? 
O25 Eu3 O7 146.23(18) . . ? 
O26 Eu3 O7 68.23(17) . . ? 
O24 Eu3 O7 69.16(17) . . ? 
O13 Eu3 O7 140.16(18) 1_455 . ? 
O14 Eu3 O7 119.41(17) 1_455 . ? 
O10 Eu3 C13 112.3(2) 1_455 . ? 
O18 Eu3 C13 85.6(2) . . ? 
O8 Eu3 C13 25.53(17) . . ? 
O25 Eu3 C13 152.8(2) . . ? 
O26 Eu3 C13 70.9(2) . . ? 
O24 Eu3 C13 81.9(2) . . ? 
O13 Eu3 C13 136.4(2) 1_455 . ? 
O14 Eu3 C13 97.31(19) 1_455 . ? 
O7 Eu3 C13 25.49(17) . . ? 
O10 Eu3 C48 106.1(2) 1_455 1_455 ? 
O18 Eu3 C48 91.5(2) . 1_455 ? 
O8 Eu3 C48 98.29(19) . 1_455 ? 
O25 Eu3 C48 78.2(2) . 1_455 ? 
O26 Eu3 C48 73.8(2) . 1_455 ? 
O24 Eu3 C48 154.9(2) . 1_455 ? 
O13 Eu3 C48 26.07(18) 1_455 1_455 ? 
O14 Eu3 C48 25.47(18) 1_455 1_455 ? 
O7 Eu3 C48 135.5(2) . 1_455 ? 
C13 Eu3 C48 118.9(2) . 1_455 ? 
#===END

data_9-Tb2Cu2 
_audit_creation_date              2014-08-23
 
_audit_creation_method
;
Olex2 1.2
(compiled 2014.03.20 svn.r2914 for OlexSys, GUI svn.r4816)
;
_publ_contact_author_address      ?
_publ_contact_author_email        ?
_publ_contact_author_name         ''
_publ_contact_author_phone        ?
_publ_section_references
;
Dolomanov, O.V., Bourhis, L.J., Gildea, R.J, Howard, J.A.K. & Puschmann, H.
 (2009), J. Appl. Cryst. 42, 339-341.

Sheldrick, G.M. (2008). Acta Cryst. A64, 112-122.
; 
_chemical_name_common             ? 
_chemical_melting_point           ? 
_chemical_formula_moiety          'C60 H42 Cu2 N10 O35 Tb2' 
_chemical_formula_sum 
 'C60 H42 Cu2 N10 O35 Tb2' 
_chemical_formula_weight          1908.00 
 
loop_ 
 _atom_type_symbol 
 _atom_type_description 
 _atom_type_scat_dispersion_real 
 _atom_type_scat_dispersion_imag 
 _atom_type_scat_source 
 'C'  'C'   0.0030   0.0020 
 'International Tables Vol C Tables 4.2.6.8 and 6.1.1.4' 
 'H'  'H'   0.0000   0.0000 
 'International Tables Vol C Tables 4.2.6.8 and 6.1.1.4' 
 'Cu'  'Cu'   0.3200   1.2650 
 'International Tables Vol C Tables 4.2.6.8 and 6.1.1.4' 
 'N'  'N'   0.0060   0.0030 
 'International Tables Vol C Tables 4.2.6.8 and 6.1.1.4' 
 'O'  'O'   0.0110   0.0060 
 'International Tables Vol C Tables 4.2.6.8 and 6.1.1.4' 
 'Tb'  'Tb'  -0.1720   4.1540 
 'International Tables Vol C Tables 4.2.6.8 and 6.1.1.4' 
 
_symmetry_cell_setting            'monoclinic' 
_space_group_name_H-M_alt    'P21/c' 
_space_group_name_Hall                '-p 2ybc'
 
loop_ 
 _symmetry_equiv_pos_as_xyz 
 'x, y, z' 
 '-x, y+1/2, -z+1/2' 
 '-x, -y, -z' 
 'x, -y-1/2, z-1/2' 
 
_cell_length_a                    11.2520(10) 
_cell_length_b                    22.3034(9) 
_cell_length_c                    27.1573(15) 
_cell_angle_alpha                 90.00 
_cell_angle_beta                  98.299(6) 
_cell_angle_gamma                 90.00 
_cell_volume                      6744.0(8) 
_cell_formula_units_Z             4 
_cell_measurement_temperature     125.1(2) 
_cell_measurement_reflns_used     ? 
_cell_measurement_theta_max       28.9640 
_cell_measurement_theta_min       2.4183 
_exptl_absorpt_coefficient_mu     2.800
_exptl_absorpt_correction_T_min   0.577 
_exptl_absorpt_correction_T_max   0.756
_exptl_absorpt_correction_type    multi-scan 
_exptl_absorpt_process_details    
;
CrysAlisPro, Agilent Technologies,
Version 1.171.35.19 (release 27-10-2011 CrysAlis171 .NET)
(compiled Oct 27 2011,15:02:11)
Empirical absorption correction using spherical harmonics,
 implemented in SCALE3 ABSPACK scaling algorithm.
; 
_exptl_crystal_description        flaky 
_exptl_crystal_colour             green 
_exptl_crystal_size_max           0.20 
_exptl_crystal_size_mid           0.20 
_exptl_crystal_size_min           0.10 
_exptl_crystal_density_meas       ? 
_exptl_crystal_density_diffrn     1.879 
_exptl_crystal_density_method     'not measured' 
_exptl_crystal_F_000              3760 
_exptl_special_details 
; 
 ? 
; 
_diffrn_reflns_av_R_equivalents   0.0441
_diffrn_reflns_av_sigmaI/netI     0.0603 
_diffrn_reflns_limit_h_min        -13 
_diffrn_reflns_limit_h_max        12 
_diffrn_reflns_limit_k_min        -24 
_diffrn_reflns_limit_k_max        26 
_diffrn_reflns_limit_l_min        -18 
_diffrn_reflns_limit_l_max        32
_diffrn_reflns_number             24429
_diffrn_reflns_theta_min          2.45 
_diffrn_reflns_theta_max          25.01 
_diffrn_reflns_theta_full         25.01 
_diffrn_ambient_temperature       125.1(2) 
_diffrn_detector_area_resol_mean  ?
_diffrn_measured_fraction_theta_full 0.998
_diffrn_measured_fraction_theta_max 0.998
_diffrn_measurement_details
;
#__ type_ start__ end____ width___ exp.time_
  1 omega  -15.00   11.25   0.7500   80.0000
omega____ theta____ kappa____ phi______ frames
    -       18.5573   89.0000   24.0000 35

#__ type_ start__ end____ width___ exp.time_
  2 omega  -37.00   49.25   0.7500   80.0000
omega____ theta____ kappa____ phi______ frames
    -       18.5573    0.0000  -30.0000 115
;
_diffrn_measurement_device_type   'SuperNova, Single source at offset), Eos'
_diffrn_measurement_method        '\w scans'
_diffrn_orient_matrix_UB_11       -0.0117122000
_diffrn_orient_matrix_UB_12       -0.0062154000
_diffrn_orient_matrix_UB_13       -0.0332876000
_diffrn_orient_matrix_UB_21       -0.0079184000
_diffrn_orient_matrix_UB_22       0.0134439000
_diffrn_orient_matrix_UB_23       0.0044288000
_diffrn_orient_matrix_UB_31       0.0066947000
_diffrn_orient_matrix_UB_32       0.0050203000
_diffrn_orient_matrix_UB_33       -0.0530513000
_diffrn_radiation_monochromator   mirror

_diffrn_radiation_wavelength      0.71073 
_diffrn_radiation_type            MoK\a 
_diffrn_source                    'SuperNova (Mo) X-ray Source'    
_diffrn_standards_number          ? 
_diffrn_standards_interval_count  ? 
_diffrn_standards_interval_time   ? 
_diffrn_standards_decay_%         ?  
_reflns_number_total              11891 
_reflns_number_gt                 9707
_reflns_odcompleteness_completeness 99.8
_reflns_odcompleteness_iscentric  1
_reflns_odcompleteness_theta      26.32 
_reflns_threshold_expression      >2sigma(I)  
_computing_cell_refinement
;
CrysAlisPro, Agilent Technologies,
Version 1.171.35.19 (release 27-10-2011 CrysAlis171 .NET)
(compiled Oct 27 2011,15:02:11)
;
_computing_data_collection
;
CrysAlisPro, Agilent Technologies,
Version 1.171.35.19 (release 27-10-2011 CrysAlis171 .NET)
(compiled Oct 27 2011,15:02:11)
;
_computing_data_reduction
;
CrysAlisPro, Agilent Technologies,
Version 1.171.35.19 (release 27-10-2011 CrysAlis171 .NET)
(compiled Oct 27 2011,15:02:11)
;
_computing_molecular_graphics     'Olex2 (Dolomanov et al., 2009)'
_computing_publication_material   'Olex2 (Dolomanov et al., 2009)'
_computing_structure_refinement   'XL (Sheldrick, 2008)'
_computing_structure_solution     'XS (Sheldrick, 2008)' 
_refine_diff_density_max    4.870 
_refine_diff_density_min   -2.507 
_refine_diff_density_rms    0.233 
_refine_ls_extinction_method      none 
_refine_ls_extinction_coef        ?
_refine_ls_goodness_of_fit_ref    1.072
_refine_ls_hydrogen_treatment     mixed
_refine_ls_matrix_type            full
_refine_ls_number_parameters      1012 
_refine_ls_number_reflns          11891 
_refine_ls_number_restraints      241 
_refine_ls_R_factor_all           0.0857 
_refine_ls_R_factor_gt            0.0711
_refine_ls_restrained_S_all       1.065 
_refine_ls_shift/su_max           0.001 
_refine_ls_shift/su_mean          0.000 
_refine_ls_structure_factor_coef  Fsqd   
_refine_ls_weighting_scheme       calc  
_refine_ls_weighting_details 
 'calc w=1/[\s^2^(Fo^2^)+(0.0844P)^2^+96.9116P] where P=(Fo^2^+2Fc^2^)/3'
_refine_ls_wR_factor_ref          0.1914 
_refine_ls_wR_factor_gt           0.1789 
_refine_special_details 
; 
 Refinement of F^2^ against ALL reflections.  The weighted R-factor wR and 
 goodness of fit S are based on F^2^, conventional R-factors R are based 
 on F, with F set to zero for negative F^2^. The threshold expression of 
 F^2^ > 2sigma(F^2^) is used only for calculating R-factors(gt) etc. and is 
 not relevant to the choice of reflections for refinement.  R-factors based 
 on F^2^ are statistically about twice as large as those based on F, and R- 
 factors based on ALL data will be even larger. 
; 
_olex2_refinement_description
;
1. Fixed Uiso
 At 1.2 times of:
  All C(H) groups
 At 1.5 times of:
  All O(H,H) groups
2. Uiso/Uaniso restraints and constraints
Uains(C48) \\sim Ueq: with sigma of 0.005 and sigma for terminal atoms of 0.01
Uains(O3) \\sim Ueq: with sigma of 0.005 and sigma for terminal atoms of 0.01
Uains(O4) \\sim Ueq: with sigma of 0.005 and sigma for terminal atoms of 0.01
Uains(C25) \\sim Ueq: with sigma of 0.005 and sigma for terminal atoms of 0.01
Uains(O15) \\sim Ueq: with sigma of 0.005 and sigma for terminal atoms of 0.01
Uains(C33) \\sim Ueq: with sigma of 0.005 and sigma for terminal atoms of 0.01
Uains(C50) \\sim Ueq: with sigma of 0.005 and sigma for terminal atoms of 0.01
Uains(N11) \\sim Ueq: with sigma of 0.001 and sigma for terminal atoms of 0.002
Uains(O21) \\sim Ueq: with sigma of 0.001 and sigma for terminal atoms of 0.002
Uains(C62) \\sim Ueq: with sigma of 0.0001 and sigma for terminal atoms of 
0.0002
Uains(C61) \\sim Ueq: with sigma of 0.0001 and sigma for terminal atoms of 
0.0002
Uains(C60) \\sim Ueq: with sigma of 0.0005 and sigma for terminal atoms of 
0.001
Uains(O20) \\sim Ueq: with sigma of 0.005 and sigma for terminal atoms of 0.01
Uains(C63) \\sim Ueq: with sigma of 0.005 and sigma for terminal atoms of 0.01
Uains(O19) \\sim Ueq: with sigma of 0.005 and sigma for terminal atoms of 0.01
Uains(C56) \\sim Ueq: with sigma of 0.005 and sigma for terminal atoms of 0.01
Uains(C57) \\sim Ueq: with sigma of 0.005 and sigma for terminal atoms of 0.01
Uains(C58) \\sim Ueq: with sigma of 0.005 and sigma for terminal atoms of 0.01
Uains(C59) \\sim Ueq: with sigma of 0.005 and sigma for terminal atoms of 0.01
Uains(N10) \\sim Ueq: with sigma of 0.005 and sigma for terminal atoms of 0.01
Uains(C55) \\sim Ueq: with sigma of 0.005 and sigma for terminal atoms of 0.01
Uains(C41) \\sim Ueq: with sigma of 0.005 and sigma for terminal atoms of 0.01
Uains(C11) \\sim Ueq: with sigma of 0.005 and sigma for terminal atoms of 0.01
Uains(C6) \\sim Ueq: with sigma of 0.005 and sigma for terminal atoms of 0.01
Uains(C12) \\sim Ueq: with sigma of 0.005 and sigma for terminal atoms of 0.01
Uains(C1) \\sim Ueq: with sigma of 0.005 and sigma for terminal atoms of 0.01
Uains(C19) \\sim Ueq: with sigma of 0.005 and sigma for terminal atoms of 0.01
Uains(C18) \\sim Ueq: with sigma of 0.005 and sigma for terminal atoms of 0.01
Uains(C20) \\sim Ueq: with sigma of 0.005 and sigma for terminal atoms of 0.01
Uains(C13) \\sim Ueq: with sigma of 0.005 and sigma for terminal atoms of 0.01
Uains(C12) \\sim Ueq: with sigma of 0.005 and sigma for terminal atoms of 0.01
Uains(C34) \\sim Ueq: with sigma of 0.005 and sigma for terminal atoms of 0.01
Uains(C35) \\sim Ueq: with sigma of 0.005 and sigma for terminal atoms of 0.01
Uains(C24) \\sim Ueq: with sigma of 0.005 and sigma for terminal atoms of 0.01
Uains(O5) \\sim Ueq: with sigma of 0.005 and sigma for terminal atoms of 0.01
Uains(C43) \\sim Ueq: with sigma of 0.005 and sigma for terminal atoms of 0.01
Uains(C42) \\sim Ueq: with sigma of 0.005 and sigma for terminal atoms of 0.01
Uains(C21) \\sim Ueq: with sigma of 0.0001 and sigma for terminal atoms of 
0.0002
Uains(C51) \\sim Ueq: with sigma of 0.0001 and sigma for terminal atoms of 
0.0002
3.a Rotating group:
 O21(H21a,H21b), O22(H22a,H22b),O23(H23a,H23b), O24(H24a,H24b), O25(H25a,H25b), 
O26(H26a,H26b)
3.b Aromatic/amide H refined with riding coordinates:
 C3(H3), C4(H4), C5(H5), C8(H8), C9(H9), C10(H10), C15(H15), C16(H16),
 C17(H17), C20(H20), C21(H21), C22(H22), C27(H27), C28(H28), C29(H29), 
C32(H32), C33(H33), C34(H34), C39(H39), C40(H40), C41(H41), C44(H44), 
C45(H45), C47(H47), C51(H51), C52(H52), C53(H53), C57(H57), C58(H58), 
C59(H59), C60(H60), C61(H61),C62(H62)
;
_atom_sites_solution_hydrogens    geom
_atom_sites_solution_primary      direct
_atom_sites_solution_secondary    difmap
loop_ 
 _atom_site_label 
 _atom_site_type_symbol 
 _atom_site_fract_x 
 _atom_site_fract_y 
 _atom_site_fract_z 
 _atom_site_U_iso_or_equiv 
 _atom_site_adp_type 
 _atom_site_occupancy 
 _atom_site_symmetry_multiplicity 
 _atom_site_calc_flag 
 _atom_site_refinement_flags 
 _atom_site_disorder_assembly 
 _atom_site_disorder_group 
C1 C 0.3277(7) 0.0392(4) 0.0948(3) 0.0100(17) Uani 1 1 d U . . 
C2 C 0.4407(7) 0.0715(4) 0.0855(3) 0.0111(17) Uani 1 1 d . . . 
C3 C 0.5154(7) 0.0437(4) 0.0570(3) 0.0148(18) Uani 1 1 d . . . 
H3 H 0.5033 0.0036 0.0482 0.018 Uiso 1 1 calc R . . 
C4 C 0.6084(7) 0.0751(4) 0.0412(3) 0.0166(19) Uani 1 1 d . . . 
H4 H 0.6589 0.0563 0.0217 0.020 Uiso 1 1 calc R . . 
C5 C 0.6259(7) 0.1340(4) 0.0544(3) 0.018(2) Uani 1 1 d . . . 
H5 H 0.6871 0.1555 0.0428 0.021 Uiso 1 1 calc R . . 
C6 C 0.4671(7) 0.1303(4) 0.1005(3) 0.0085(16) Uani 1 1 d U . . 
C7 C 0.3974(7) 0.1677(4) 0.1319(3) 0.0091(17) Uani 1 1 d . . . 
C8 C 0.3321(7) 0.2655(4) 0.1419(3) 0.0154(19) Uani 1 1 d . . . 
H8 H 0.3343 0.3060 0.1339 0.018 Uiso 1 1 calc R . . 
C9 C 0.2607(7) 0.2463(4) 0.1759(4) 0.019(2) Uani 1 1 d . . . 
H9 H 0.2085 0.2729 0.1883 0.022 Uiso 1 1 calc R . . 
C10 C 0.2675(7) 0.1877(4) 0.1914(3) 0.0138(18) Uani 1 1 d . . . 
H10 H 0.2238 0.1749 0.2160 0.017 Uiso 1 1 calc R . . 
C11 C 0.3396(7) 0.1476(4) 0.1703(3) 0.0096(17) Uani 1 1 d U . . 
C12 C 0.3636(7) 0.0870(4) 0.1950(3) 0.0088(17) Uani 1 1 d U . . 
C13 C 0.2784(7) -0.0556(4) 0.3066(3) 0.0126(18) Uani 1 1 d U . . 
C14 C 0.3606(7) -0.0804(4) 0.3509(3) 0.0106(17) Uani 1 1 d . . . 
C15 C 0.3812(8) -0.0448(4) 0.3929(3) 0.018(2) Uani 1 1 d . . . 
H15 H 0.3544 -0.0053 0.3914 0.022 Uiso 1 1 calc R . . 
C16 C 0.4417(8) -0.0674(5) 0.4375(4) 0.025(2) Uani 1 1 d . . . 
H16 H 0.4604 -0.0429 0.4652 0.030 Uiso 1 1 calc R . . 
C17 C 0.4729(7) -0.1269(4) 0.4393(3) 0.017(2) Uani 1 1 d . . . 
H17 H 0.5054 -0.1436 0.4696 0.021 Uiso 1 1 calc R . . 
C18 C 0.4065(7) -0.1382(4) 0.3541(3) 0.0119(17) Uani 1 1 d U . . 
C19 C 0.4070(6) -0.1806(3) 0.3117(3) 0.0071(16) Uani 1 1 d U . . 
C20 C 0.3795(7) -0.2793(4) 0.2848(3) 0.0128(18) Uani 1 1 d U . . 
H20 H 0.3602 -0.3188 0.2914 0.015 Uiso 1 1 calc R . . 
C21 C 0.4066(7) -0.2651(4) 0.2386(3) 0.0118(17) Uani 1 1 d U . . 
H21 H 0.4020 -0.2939 0.2136 0.014 Uiso 1 1 calc R . . 
C22 C 0.4404(7) -0.2075(4) 0.2302(3) 0.0138(18) Uani 1 1 d . . . 
H22 H 0.4616 -0.1973 0.1994 0.017 Uiso 1 1 calc R . . 
C23 C 0.4437(7) -0.1640(4) 0.2670(3) 0.0091(17) Uani 1 1 d . . . 
C24 C 0.4995(7) -0.1047(4) 0.2592(3) 0.0108(17) Uani 1 1 d U . . 
C25 C -0.1791(7) -0.0298(4) 0.0938(3) 0.0081(16) Uani 1 1 d U . . 
C26 C -0.0679(7) -0.0648(4) 0.0846(3) 0.0116(18) Uani 1 1 d . . . 
C27 C 0.0127(7) -0.0376(4) 0.0580(3) 0.0112(17) Uani 1 1 d . . . 
H27 H 0.0012 0.0018 0.0472 0.013 Uiso 1 1 calc R . . 
C28 C 0.1113(7) -0.0700(4) 0.0475(3) 0.0144(18) Uani 1 1 d . . . 
H28 H 0.1669 -0.0523 0.0298 0.017 Uiso 1 1 calc R . . 
C29 C 0.1263(7) -0.1281(4) 0.0634(3) 0.0129(18) Uani 1 1 d . . . 
H29 H 0.1919 -0.1497 0.0557 0.015 Uiso 1 1 calc R . . 
C30 C -0.0457(7) -0.1228(4) 0.1016(3) 0.0103(17) Uani 1 1 d . . . 
C31 C -0.1218(7) -0.1586(4) 0.1308(3) 0.0100(17) Uani 1 1 d . . . 
C32 C -0.2084(8) -0.2487(4) 0.1377(4) 0.024(2) Uani 1 1 d . . . 
H32 H -0.2203 -0.2879 0.1265 0.029 Uiso 1 1 calc RD . . 
C33 C -0.2655(8) -0.2319(4) 0.1760(4) 0.021(2) Uani 1 1 d U . . 
H33 H -0.3162 -0.2580 0.1897 0.025 Uiso 1 1 calc R . . 
C34 C -0.2457(7) -0.1752(4) 0.1937(3) 0.0127(18) Uani 1 1 d U . . 
H34 H -0.2823 -0.1619 0.2203 0.015 Uiso 1 1 calc R . . 
C35 C -0.1702(7) -0.1367(4) 0.1718(3) 0.0080(16) Uani 1 1 d U . . 
C36 C -0.1371(7) -0.0770(4) 0.1955(3) 0.0102(17) Uani 1 1 d . . . 
C37 C -0.0035(7) 0.1165(4) 0.2567(3) 0.0091(16) Uani 1 1 d . . . 
C38 C -0.0593(7) 0.1754(4) 0.2680(3) 0.0087(16) Uani 1 1 d U . . 
C39 C -0.0733(7) 0.2216(4) 0.2329(3) 0.0135(18) Uani 1 1 d . . . 
H39 H -0.0622 0.2139 0.2003 0.016 Uiso 1 1 calc R . . 
C40 C -0.1037(7) 0.2789(4) 0.2466(3) 0.0145(18) Uani 1 1 d . . . 
H40 H -0.1180 0.3092 0.2230 0.017 Uiso 1 1 calc R . . 
C41 C -0.1122(7) 0.2901(4) 0.2958(3) 0.0119(17) Uani 1 1 d U . . 
H41 H -0.1264 0.3290 0.3058 0.014 Uiso 1 1 calc R . . 
C42 C -0.0832(7) 0.1898(4) 0.3153(3) 0.0102(17) Uani 1 1 d U . . 
C43 C -0.0760(7) 0.1447(4) 0.3555(3) 0.0090(16) Uani 1 1 d U . . 
C44 C 0.0148(7) 0.1279(4) 0.4372(4) 0.017(2) Uani 1 1 d . . . 
H44 H 0.0535 0.1427 0.4673 0.021 Uiso 1 1 calc R . . 
C45 C -0.0070(7) 0.0666(4) 0.4325(3) 0.0175(19) Uani 1 1 d . . . 
H45 H 0.0258 0.0398 0.4570 0.021 Uiso 1 1 calc R . . 
C46 C -0.0795(7) 0.0469(4) 0.3899(3) 0.0150(18) Uani 1 1 d . . . 
H46 H -0.1026 0.0068 0.3872 0.018 Uiso 1 1 calc R . . 
C47 C -0.1181(7) 0.0861(4) 0.3509(3) 0.0118(18) Uani 1 1 d . . . 
C48 C -0.2127(7) 0.0648(4) 0.3083(3) 0.0089(17) Uani 1 1 d U . . 
C49 C -0.2041(8) 0.2237(4) 0.5827(3) 0.0172(19) Uani 1 1 d . . . 
C50 C -0.1009(7) 0.2390(4) 0.5550(3) 0.0178(19) Uani 1 1 d U . . 
C51 C -0.0023(9) 0.2661(5) 0.5803(4) 0.029(2) Uani 1 1 d U . . 
H51 H 0.0044 0.2699 0.6147 0.035 Uiso 1 1 calc R . . 
C52 C 0.0895(8) 0.2883(5) 0.5556(4) 0.033(3) Uani 1 1 d . . . 
H52 H 0.1562 0.3077 0.5726 0.040 Uiso 1 1 calc R . . 
C53 C 0.0764(8) 0.2800(4) 0.5051(3) 0.020(2) Uani 1 1 d . . . 
H53 H 0.1358 0.2944 0.4877 0.024 Uiso 1 1 calc R . . 
C54 C -0.1078(8) 0.2308(4) 0.5039(3) 0.0156(19) Uani 1 1 d . . . 
C57 C -0.3768(13) 0.1405(7) 0.4372(6) 0.033(3) Uani 0.75 1 d PU A 2 
H57 H -0.4148 0.1034 0.4365 0.039 Uiso 0.75 1 calc PR A 2 
C58 C -0.4290(14) 0.1849(7) 0.4063(6) 0.040(4) Uani 0.75 1 d PU A 2 
H58 H -0.5012 0.1787 0.3855 0.049 Uiso 0.75 1 calc PR A 2 
C59 C -0.3710(15) 0.2376(8) 0.4075(6) 0.043(4) Uani 0.75 1 d PU A 2 
H59 H -0.4053 0.2687 0.3875 0.051 Uiso 0.75 1 calc PR A 2 
C62 C -0.3469(19) 0.1278(8) 0.4307(7) 0.11(3) Uani 0.25 1 d PGU A 1 
H62 H -0.3806 0.0898 0.4317 0.120 Uiso 0.25 1 calc PR A 1 
C56 C -0.2661(9) 0.1483(4) 0.4707(4) 0.035(3) Uani 1 1 d GU . . 
C55 C -0.2158(8) 0.2051(4) 0.4692(4) 0.028(2) Uani 1 1 d GU A . 
N11 N -0.246(2) 0.2413(7) 0.4277(6) 0.039(16) Uani 0.25 1 d PGU A 1 
C60 C -0.327(3) 0.2208(12) 0.3876(7) 0.058(14) Uani 0.25 1 d PGU A 1 
H60 H -0.3475 0.2451 0.3599 0.069 Uiso 0.25 1 calc PR A 1 
C61 C -0.377(3) 0.1641(13) 0.3891(8) 0.09(2) Uani 0.25 1 d PGU A 1 
H61 H -0.4315 0.1503 0.3624 0.112 Uiso 0.25 1 calc PR A 1 
C63 C -0.2107(11) 0.0972(6) 0.5003(5) 0.042(3) Uani 1 1 d U A . 
N1 N 0.5570(6) 0.1611(3) 0.0836(3) 0.0120(15) Uani 1 1 d . . . 
N2 N 0.3983(6) 0.2263(3) 0.1202(3) 0.0130(15) Uani 1 1 d . . . 
N3 N -0.1390(6) -0.2155(3) 0.1152(3) 0.0175(17) Uani 1 1 d . . . 
N4 N 0.0486(6) -0.1548(3) 0.0899(3) 0.0120(15) Uani 1 1 d . . . 
N5 N 0.3798(6) -0.2381(3) 0.3212(3) 0.0126(15) Uani 1 1 d . . . 
N6 N 0.4579(6) -0.1614(3) 0.3988(3) 0.0133(15) Uani 1 1 d . . . 
N7 N -0.0182(6) 0.1662(3) 0.3997(3) 0.0126(15) Uani 1 1 d . A . 
N8 N -0.1004(6) 0.2460(3) 0.3298(3) 0.0110(15) Uani 1 1 d . A . 
N9 N -0.0197(6) 0.2516(3) 0.4794(3) 0.0154(16) Uani 1 1 d . A . 
N10 N -0.2647(15) 0.2476(7) 0.4367(6) 0.043(4) Uani 0.75 1 d PU A 2 
O1 O 0.3397(5) -0.0152(3) 0.1073(2) 0.0154(13) Uani 1 1 d . . . 
O2 O 0.2310(5) 0.0682(3) 0.0866(2) 0.0171(14) Uani 1 1 d . . . 
O3 O 0.4680(5) 0.0666(3) 0.1964(2) 0.0136(13) Uani 1 1 d U . . 
O4 O 0.2816(5) 0.0644(3) 0.2145(2) 0.0132(13) Uani 1 1 d U . . 
O5 O 0.4410(5) -0.0652(3) 0.2318(2) 0.0116(12) Uani 1 1 d U . . 
O6 O 0.6076(5) -0.0947(3) 0.2795(2) 0.0156(13) Uani 1 1 d . . . 
O7 O 0.2111(5) -0.0898(3) 0.2772(2) 0.0121(12) Uani 1 1 d . . . 
O8 O 0.2764(5) 0.0003(2) 0.3012(2) 0.0138(13) Uani 1 1 d . . . 
O9 O -0.1638(5) 0.0238(3) 0.1054(2) 0.0132(13) Uani 1 1 d . . . 
O10 O -0.2778(5) -0.0576(3) 0.0868(2) 0.0172(14) Uani 1 1 d . . . 
O11 O -0.0315(5) -0.0584(3) 0.1932(2) 0.0121(12) Uani 1 1 d . . . 
O12 O -0.2117(5) -0.0517(3) 0.2171(2) 0.0137(13) Uani 1 1 d U . . 
O13 O -0.0619(5) 0.0786(3) 0.2280(2) 0.0153(13) Uani 1 1 d . . . 
O14 O 0.1052(5) 0.1077(3) 0.2755(2) 0.0139(13) Uani 1 1 d . . . 
O15 O -0.2222(5) 0.0085(3) 0.3026(2) 0.0127(13) Uani 1 1 d U . . 
O16 O -0.2786(5) 0.1009(3) 0.2825(2) 0.0165(13) Uani 1 1 d . . . 
O17 O -0.3068(5) 0.2397(3) 0.5602(2) 0.0155(13) Uani 1 1 d . . . 
O18 O -0.1779(6) 0.2039(3) 0.6257(2) 0.0265(16) Uani 1 1 d . . . 
O19 O -0.1234(8) 0.1095(4) 0.5326(3) 0.048(2) Uani 1 1 d U . . 
O20 O -0.2540(8) 0.0466(4) 0.4889(4) 0.057(3) Uani 1 1 d U . . 
O21 O -0.2861(5) 0.0683(2) 0.1794(2) 0.0117(12) Uani 1 1 d U . . 
H21A H -0.2798 0.0504 0.1514 0.018 Uiso 1 1 d R . . 
H21B H -0.2147 0.0783 0.1936 0.018 Uiso 1 1 d R . . 
O22 O -0.4334(5) -0.0434(3) 0.1536(2) 0.0177(14) Uani 1 1 d . . . 
H22A H -0.5068 -0.0346 0.1412 0.027 Uiso 1 1 d R . . 
H22B H -0.4275 -0.0823 0.1563 0.027 Uiso 1 1 d R . . 
O23 O -0.4814(5) 0.0316(3) 0.3017(2) 0.0160(13) Uani 1 1 d . . . 
H23A H -0.4380 0.0224 0.3298 0.024 Uiso 1 1 d R . . 
H23B H -0.5500 0.0132 0.3000 0.024 Uiso 1 1 d R . . 
O24 O 0.2171(5) -0.0568(2) 0.1784(2) 0.0113(12) Uani 1 1 d . . . 
H24A H 0.1881 -0.0923 0.1784 0.017 Uiso 1 1 d R . . 
H24B H 0.2922 -0.0580 0.1893 0.017 Uiso 1 1 d R . . 
O25 O 0.0140(5) -0.0188(3) 0.2969(2) 0.0147(13) Uani 1 1 d . . . 
H25A H 0.0405 -0.0526 0.3098 0.022 Uiso 1 1 d R . . 
H25B H -0.0622 -0.0223 0.2866 0.022 Uiso 1 1 d R . . 
O26 O 0.0648(5) 0.0530(3) 0.1505(2) 0.0131(13) Uani 1 1 d . . . 
H26A H -0.0046 0.0398 0.1360 0.020 Uiso 1 1 d R . . 
H26B H 0.1187 0.0450 0.1313 0.020 Uiso 1 1 d R . . 
O28 O 0.4104(7) 0.2514(4) 0.0100(3) 0.046(2) Uani 1 1 d . . . 
Cu1 Cu 0.55077(9) 0.24979(5) 0.09234(4) 0.0128(2) Uani 1 1 d . . . 
Cu2 Cu -0.04109(8) 0.25498(4) 0.40512(4) 0.0104(2) Uani 1 1 d . . . 
Tb1 Tb 0.11702(3) 0.007464(17) 0.230270(15) 0.00658(14) Uani 1 1 d . . . 
Tb2 Tb -0.38052(3) 0.003092(17) 0.233011(15) 0.00753(14) Uani 1 1 d . . . 
O29 O 0.3057(8) 0.0623(5) 0.4749(4) 0.069(3) Uani 1 1 d . . . 
O33 O -0.2937(8) -0.1381(4) 0.0067(3) 0.057(3) Uani 1 1 d . . . 
O34 O -0.2148(7) -0.1048(4) 0.3701(3) 0.043(2) Uani 1 1 d . . . 
O32 O 0.0366(7) -0.1022(4) 0.3696(3) 0.045(2) Uani 1 1 d . . . 
O1A O -0.3513(8) 0.0010(5) 0.3942(4) 0.063(3) Uani 1 1 d . . . 
O1B O 0.2384(10) 0.1548(5) 0.5316(5) 0.083(4) Uani 1 1 d . . . 
O1D O -0.6215(13) 0.1352(6) 0.3107(6) 0.114(5) Uani 1 1 d . . . 
O1C O -0.2519(11) -0.4021(5) 0.1252(5) 0.090(4) Uani 1 1 d D . . 
 
loop_ 
 _atom_site_aniso_label 
 _atom_site_aniso_U_11 
 _atom_site_aniso_U_22 
 _atom_site_aniso_U_33 
 _atom_site_aniso_U_23 
 _atom_site_aniso_U_13 
 _atom_site_aniso_U_12 
C1 0.010(3) 0.010(3) 0.010(3) -0.002(3) 0.001(3) -0.006(3) 
C2 0.009(4) 0.013(4) 0.012(4) -0.005(3) 0.002(3) -0.003(3) 
C3 0.011(4) 0.014(5) 0.019(5) 0.001(4) 0.001(3) -0.001(3) 
C4 0.012(4) 0.026(5) 0.014(5) 0.000(4) 0.007(3) 0.001(4) 
C5 0.012(4) 0.020(5) 0.024(5) 0.001(4) 0.011(4) -0.003(4) 
C6 0.007(3) 0.007(3) 0.012(3) 0.002(3) 0.001(3) -0.001(3) 
C7 0.006(4) 0.011(4) 0.009(4) -0.003(3) -0.003(3) 0.000(3) 
C8 0.015(4) 0.009(4) 0.024(5) -0.005(4) 0.008(4) 0.002(3) 
C9 0.011(4) 0.017(5) 0.028(6) -0.009(4) 0.003(4) 0.005(4) 
C10 0.008(4) 0.019(5) 0.014(5) -0.004(4) 0.000(3) -0.001(3) 
C11 0.007(3) 0.007(3) 0.015(3) -0.001(3) 0.000(3) -0.002(3) 
C12 0.010(3) 0.007(3) 0.009(3) -0.004(3) -0.001(3) -0.001(3) 
C13 0.008(3) 0.015(4) 0.017(4) 0.004(3) 0.007(3) 0.001(3) 
C14 0.004(4) 0.014(4) 0.014(5) 0.002(3) 0.002(3) 0.002(3) 
C15 0.022(5) 0.009(4) 0.023(5) -0.001(4) 0.000(4) 0.007(4) 
C16 0.025(5) 0.029(6) 0.018(5) -0.004(4) -0.007(4) 0.009(4) 
C17 0.013(4) 0.027(5) 0.011(5) -0.002(4) -0.002(3) 0.012(4) 
C18 0.008(3) 0.015(3) 0.014(4) 0.000(3) 0.003(3) -0.002(3) 
C19 0.005(3) 0.005(3) 0.011(3) -0.001(3) 0.001(3) 0.002(3) 
C20 0.009(3) 0.009(3) 0.020(4) -0.004(3) 0.002(3) 0.003(3) 
C21 0.0120(19) 0.0112(19) 0.0121(19) -0.0002(10) 0.0011(10) -0.0003(10) 
C22 0.011(4) 0.017(5) 0.013(5) -0.001(4) 0.001(3) 0.006(3) 
C23 0.007(4) 0.008(4) 0.012(4) -0.001(3) 0.001(3) 0.004(3) 
C24 0.010(3) 0.006(3) 0.017(4) -0.004(3) 0.003(3) -0.001(3) 
C25 0.006(3) 0.007(3) 0.011(3) 0.002(3) 0.003(3) 0.003(3) 
C26 0.007(4) 0.015(5) 0.012(4) -0.006(3) 0.001(3) -0.004(3) 
C27 0.012(4) 0.005(4) 0.017(5) -0.001(3) 0.004(3) -0.001(3) 
C28 0.009(4) 0.016(5) 0.020(5) -0.004(4) 0.008(3) -0.006(3) 
C29 0.010(4) 0.012(4) 0.017(5) 0.000(4) 0.005(3) 0.001(3) 
C30 0.006(4) 0.017(5) 0.007(4) -0.003(3) -0.001(3) -0.001(3) 
C31 0.008(4) 0.007(4) 0.015(5) -0.003(3) 0.003(3) 0.000(3) 
C32 0.016(5) 0.019(5) 0.040(6) -0.006(4) 0.014(4) -0.005(4) 
C33 0.021(4) 0.016(4) 0.027(4) 0.001(3) 0.008(3) -0.006(3) 
C34 0.009(3) 0.010(3) 0.019(4) 0.004(3) 0.004(3) 0.000(3) 
C35 0.006(3) 0.006(3) 0.012(3) 0.000(3) 0.003(3) 0.003(3) 
C36 0.011(4) 0.008(4) 0.011(4) 0.003(3) 0.001(3) -0.005(3) 
C37 0.011(4) 0.007(4) 0.010(4) 0.000(3) 0.005(3) -0.003(3) 
C38 0.004(3) 0.008(3) 0.013(3) -0.001(3) -0.001(3) -0.001(3) 
C39 0.018(4) 0.011(4) 0.012(5) 0.001(3) 0.002(3) -0.001(3) 
C40 0.008(4) 0.010(4) 0.025(5) 0.007(4) 0.000(3) -0.001(3) 
C41 0.008(3) 0.011(3) 0.015(4) 0.001(3) -0.003(3) 0.004(3) 
C42 0.006(3) 0.009(3) 0.014(3) 0.000(3) -0.002(3) -0.001(3) 
C43 0.006(3) 0.009(3) 0.012(3) -0.001(3) 0.004(3) -0.001(3) 
C44 0.012(4) 0.020(5) 0.021(5) 0.009(4) 0.003(4) -0.001(4) 
C45 0.014(4) 0.021(5) 0.017(5) 0.005(4) 0.001(4) 0.000(4) 
C46 0.015(4) 0.014(5) 0.016(5) 0.005(4) 0.003(3) -0.003(3) 
C47 0.006(4) 0.013(4) 0.017(5) -0.002(4) 0.003(3) -0.005(3) 
C48 0.008(3) 0.008(3) 0.013(3) 0.000(3) 0.007(3) -0.002(3) 
C49 0.021(5) 0.011(5) 0.020(5) -0.003(4) 0.007(4) 0.000(4) 
C50 0.011(3) 0.023(4) 0.019(4) 0.001(3) 0.000(3) 0.005(3) 
C51 0.029(3) 0.030(3) 0.029(3) -0.0002(10) 0.0038(11) -0.0003(10) 
C52 0.009(5) 0.060(8) 0.029(6) -0.016(5) -0.001(4) -0.004(5) 
C53 0.011(4) 0.027(5) 0.021(5) 0.002(4) 0.002(4) 0.002(4) 
C54 0.018(4) 0.013(5) 0.019(5) 0.000(4) 0.010(4) 0.000(3) 
C57 0.030(5) 0.034(5) 0.034(5) -0.007(4) 0.003(4) -0.009(4) 
C58 0.039(5) 0.041(5) 0.040(5) 0.000(4) 0.000(4) -0.006(4) 
C59 0.044(5) 0.041(6) 0.040(6) 0.002(4) -0.004(4) -0.001(4) 
C62 0.11(3) 0.11(3) 0.11(3) -0.0001(10) 0.016(4) -0.0001(10) 
C56 0.035(4) 0.039(4) 0.032(4) -0.005(4) 0.009(4) -0.004(4) 
C55 0.028(4) 0.032(4) 0.024(4) -0.001(3) 0.006(3) -0.006(3) 
N11 0.039(16) 0.040(16) 0.039(16) 0.0000(10) 0.006(3) 0.0000(10) 
C60 0.058(14) 0.058(14) 0.058(14) -0.0001(10) 0.008(2) 0.0000(10) 
C61 0.09(2) 0.09(2) 0.09(2) -0.0001(10) 0.014(3) 0.0000(10) 
C63 0.041(4) 0.045(5) 0.041(5) -0.006(4) 0.014(4) -0.007(4) 
N1 0.010(3) 0.013(4) 0.015(4) 0.001(3) 0.005(3) -0.001(3) 
N2 0.010(3) 0.012(4) 0.017(4) 0.001(3) 0.002(3) -0.001(3) 
N3 0.013(4) 0.013(4) 0.029(5) -0.003(3) 0.009(3) 0.003(3) 
N4 0.009(3) 0.013(4) 0.014(4) -0.007(3) 0.002(3) 0.001(3) 
N5 0.006(3) 0.009(4) 0.023(4) -0.001(3) 0.004(3) 0.004(3) 
N6 0.007(3) 0.016(4) 0.015(4) 0.002(3) -0.001(3) 0.003(3) 
N7 0.011(3) 0.011(4) 0.016(4) 0.000(3) 0.001(3) -0.006(3) 
N8 0.011(3) 0.007(4) 0.016(4) 0.000(3) 0.005(3) -0.003(3) 
N9 0.016(4) 0.015(4) 0.014(4) -0.004(3) -0.002(3) -0.003(3) 
N10 0.041(6) 0.046(6) 0.039(6) 0.012(4) -0.004(4) -0.006(4) 
O1 0.012(3) 0.011(3) 0.024(4) 0.003(3) 0.003(3) -0.004(2) 
O2 0.005(3) 0.011(3) 0.035(4) -0.003(3) 0.002(3) -0.002(2) 
O3 0.011(3) 0.010(3) 0.020(3) 0.002(2) 0.004(2) 0.007(2) 
O4 0.008(2) 0.011(3) 0.021(3) 0.003(2) 0.004(2) -0.005(2) 
O5 0.008(2) 0.009(3) 0.018(3) 0.004(2) 0.002(2) -0.005(2) 
O6 0.005(3) 0.011(3) 0.031(4) 0.004(3) 0.003(2) 0.001(2) 
O7 0.006(3) 0.013(3) 0.017(3) -0.004(2) 0.003(2) 0.001(2) 
O8 0.010(3) 0.006(3) 0.023(4) 0.004(2) -0.002(3) -0.003(2) 
O9 0.009(3) 0.008(3) 0.023(3) -0.002(3) 0.001(2) 0.002(2) 
O10 0.012(3) 0.014(3) 0.026(4) 0.000(3) 0.004(3) 0.000(2) 
O11 0.009(3) 0.009(3) 0.019(3) -0.003(2) 0.005(2) -0.004(2) 
O12 0.009(2) 0.012(3) 0.020(3) -0.006(2) 0.006(2) 0.004(2) 
O13 0.005(3) 0.015(3) 0.025(4) -0.005(3) 0.001(2) 0.001(2) 
O14 0.008(3) 0.013(3) 0.020(3) -0.001(3) 0.001(2) 0.004(2) 
O15 0.012(3) 0.008(3) 0.017(3) -0.007(2) 0.000(2) -0.002(2) 
O16 0.014(3) 0.014(3) 0.021(4) 0.002(3) 0.000(3) 0.000(2) 
O17 0.012(3) 0.019(3) 0.017(3) 0.003(3) 0.005(2) 0.005(2) 
O18 0.018(3) 0.047(5) 0.015(4) 0.009(3) 0.005(3) 0.013(3) 
O19 0.066(5) 0.041(5) 0.040(5) 0.012(4) 0.013(4) 0.009(4) 
O20 0.070(6) 0.030(4) 0.075(6) -0.007(4) 0.027(5) -0.018(4) 
O21 0.0094(18) 0.0114(19) 0.0143(19) -0.0014(16) 0.0021(15) -0.0026(15) 
O22 0.011(3) 0.016(3) 0.025(4) -0.004(3) 0.001(3) 0.000(2) 
O23 0.012(3) 0.010(3) 0.026(4) -0.001(3) 0.005(3) -0.005(2) 
O24 0.006(3) 0.004(3) 0.023(3) -0.002(2) 0.003(2) -0.001(2) 
O25 0.012(3) 0.013(3) 0.020(3) 0.006(3) 0.004(2) 0.003(2) 
O26 0.008(3) 0.011(3) 0.021(3) -0.001(2) 0.003(2) -0.003(2) 
O28 0.040(5) 0.053(6) 0.043(5) 0.009(4) -0.005(4) -0.004(4) 
Cu1 0.0118(5) 0.0091(5) 0.0187(6) -0.0028(4) 0.0066(4) -0.0058(4) 
Cu2 0.0092(5) 0.0096(5) 0.0125(6) 0.0012(4) 0.0017(4) -0.0019(4) 
Tb1 0.0030(2) 0.0028(2) 0.0140(2) -0.00046(15) 0.00138(15) -0.00056(13) 
Tb2 0.0035(2) 0.0028(2) 0.0166(3) 0.00030(15) 0.00282(16) 0.00014(13) 
O29 0.050(6) 0.056(7) 0.098(9) -0.001(6) -0.002(6) 0.001(5) 
O33 0.054(5) 0.046(6) 0.062(6) -0.016(5) -0.021(4) 0.016(4) 
O34 0.044(5) 0.030(5) 0.054(6) 0.013(4) 0.003(4) -0.012(4) 
O32 0.048(5) 0.049(5) 0.039(5) 0.022(4) 0.013(4) 0.025(4) 
O1A 0.050(6) 0.085(8) 0.055(6) 0.003(5) 0.008(5) 0.000(5) 
O1B 0.064(7) 0.085(9) 0.092(9) -0.014(7) -0.014(6) 0.014(6) 
O1D 0.108(10) 0.077(10) 0.147(14) -0.006(9) -0.014(9) 0.020(8) 
O1C 0.098(9) 0.060(7) 0.097(9) 0.018(6) -0.034(7) -0.040(6) 
 
_geom_special_details 
; 
 All esds (except the esd in the dihedral angle between two l.s. planes) 
 are estimated using the full covariance matrix.  The cell esds are taken 
 into account individually in the estimation of esds in distances, angles 
 and torsion angles; correlations between esds in cell parameters are only 
 used when they are defined by crystal symmetry.  An approximate (isotropic) 
 treatment of cell esds is used for estimating esds involving l.s. planes. 
; 
 
loop_ 
 _geom_bond_atom_site_label_1 
 _geom_bond_atom_site_label_2 
 _geom_bond_distance 
 _geom_bond_site_symmetry_2 
 _geom_bond_publ_flag 
C1 O2 1.257(10) . ? 
C1 O1 1.262(10) . ? 
C1 C2 1.514(11) . ? 
C2 C3 1.372(12) . ? 
C2 C6 1.392(11) . ? 
C3 C4 1.377(12) . ? 
C3 H3 0.9300 . ? 
C4 C5 1.369(13) . ? 
C4 H4 0.9300 . ? 
C5 N1 1.332(11) . ? 
C5 H5 0.9300 . ? 
C6 N1 1.356(10) . ? 
C6 C7 1.494(11) . ? 
C7 N2 1.345(11) . ? 
C7 C11 1.380(12) . ? 
C8 N2 1.340(11) . ? 
C8 C9 1.376(13) . ? 
C8 H8 0.9300 . ? 
C9 C10 1.373(13) . ? 
C9 H9 0.9300 . ? 
C10 C11 1.387(12) . ? 
C10 H10 0.9300 . ? 
C11 C12 1.516(11) . ? 
C12 O4 1.235(10) . ? 
C12 O3 1.255(9) . ? 
C13 O8 1.257(10) . ? 
C13 O7 1.273(10) . ? 
C13 C14 1.512(11) . ? 
C13 Tb1 2.913(8) . ? 
C14 C15 1.382(12) . ? 
C14 C18 1.387(12) . ? 
C15 C16 1.395(13) . ? 
C15 H15 0.9300 . ? 
C16 C17 1.370(13) . ? 
C16 H16 0.9300 . ? 
C17 N6 1.333(11) . ? 
C17 H17 0.9300 . ? 
C18 N6 1.370(11) . ? 
C18 C19 1.490(11) . ? 
C19 N5 1.351(10) . ? 
C19 C23 1.389(11) . ? 
C20 N5 1.348(11) . ? 
C20 C21 1.372(12) . ? 
C20 H20 0.9300 . ? 
C21 C22 1.368(12) . ? 
C21 H21 0.9300 . ? 
C22 C23 1.391(12) . ? 
C22 H22 0.9300 . ? 
C23 C24 1.492(11) . ? 
C24 O5 1.273(10) . ? 
C24 O6 1.280(10) . ? 
C24 Tb2 2.895(8) 1_655 ? 
C25 O9 1.241(10) . ? 
C25 O10 1.262(10) . ? 
C25 C26 1.525(11) . ? 
C26 C27 1.380(11) . ? 
C26 C30 1.385(12) . ? 
C27 C28 1.387(11) . ? 
C27 H27 0.9300 . ? 
C28 C29 1.368(12) . ? 
C28 H28 0.9300 . ? 
C29 N4 1.349(11) . ? 
C29 H29 0.9300 . ? 
C30 N4 1.355(10) . ? 
C30 C31 1.481(11) . ? 
C31 N3 1.344(11) . ? 
C31 C35 1.394(11) . ? 
C32 N3 1.292(12) . ? 
C32 C33 1.352(13) . ? 
C32 H32 0.9300 . ? 
C33 C34 1.360(12) . ? 
C33 H33 0.9300 . ? 
C34 C35 1.399(11) . ? 
C34 H34 0.9300 . ? 
C35 C36 1.504(11) . ? 
C36 O12 1.228(10) . ? 
C36 O11 1.268(9) . ? 
C37 O13 1.267(10) . ? 
C37 O14 1.271(10) . ? 
C37 C38 1.506(11) . ? 
C37 Tb1 2.924(8) . ? 
C38 C42 1.387(12) . ? 
C38 C39 1.397(12) . ? 
C39 C40 1.388(12) . ? 
C39 H39 0.9300 . ? 
C40 C41 1.377(12) . ? 
C40 H40 0.9300 . ? 
C41 N8 1.341(11) . ? 
C41 H41 0.9300 . ? 
C42 N8 1.337(10) . ? 
C42 C43 1.478(11) . ? 
C43 N7 1.368(11) . ? 
C43 C47 1.390(11) . ? 
C44 N7 1.340(11) . ? 
C44 C45 1.392(13) . ? 
C44 H44 0.9300 . ? 
C45 C46 1.389(12) . ? 
C45 H45 0.9300 . ? 
C46 C47 1.392(12) . ? 
C46 H46 0.9300 . ? 
C47 C48 1.530(11) . ? 
C48 O16 1.241(10) . ? 
C48 O15 1.267(10) . ? 
C48 Tb2 2.920(8) . ? 
C49 O18 1.244(11) . ? 
C49 O17 1.277(11) . ? 
C49 C50 1.511(12) . ? 
C50 C51 1.359(14) . ? 
C50 C54 1.390(13) . ? 
C51 C52 1.401(14) . ? 
C51 H51 0.9300 . ? 
C52 C53 1.371(13) . ? 
C52 H52 0.9300 . ? 
C53 N9 1.355(11) . ? 
C53 H53 0.9300 . ? 
C54 N9 1.354(11) . ? 
C54 C55 1.538(12) . ? 
C57 C58 1.37(2) . ? 
C57 C56 1.442(18) . ? 
C57 H57 0.9300 . ? 
C58 C59 1.34(2) . ? 
C58 H58 0.9300 . ? 
C59 N10 1.35(2) . ? 
C59 H59 0.9300 . ? 
C62 C56 1.3900 . ? 
C62 C61 1.3900 . ? 
C62 H62 0.9300 . ? 
C56 C55 1.3900 . ? 
C56 C63 1.481(16) . ? 
C55 N10 1.357(17) . ? 
C55 N11 1.3900 . ? 
N11 C60 1.3900 . ? 
N11 Cu2 2.49(2) . ? 
C60 C61 1.3900 . ? 
C60 H60 0.9300 . ? 
C61 H61 0.9300 . ? 
C63 O19 1.249(14) . ? 
C63 O20 1.249(15) . ? 
N1 Cu1 1.994(7) . ? 
N2 Cu1 2.041(7) . ? 
N3 Cu2 2.273(7) 2_545 ? 
N4 Cu2 2.018(7) 2_545 ? 
N5 Cu1 2.381(8) 2_645 ? 
N6 Cu1 2.000(7) 2_645 ? 
N7 Cu2 2.005(7) . ? 
N8 Cu2 2.068(7) . ? 
N9 Cu2 1.999(8) . ? 
O3 Tb2 2.326(5) 1_655 ? 
O4 Tb1 2.335(5) . ? 
O5 Tb2 2.518(5) 1_655 ? 
O6 Tb2 2.533(6) 1_655 ? 
O7 Tb1 2.657(6) . ? 
O8 Tb1 2.439(6) . ? 
O11 Tb1 2.341(5) . ? 
O12 Tb2 2.350(5) . ? 
O13 Tb1 2.556(5) . ? 
O14 Tb1 2.563(6) . ? 
O15 Tb2 2.406(6) . ? 
O16 Tb2 2.727(6) . ? 
O17 Cu1 1.945(6) 4_466 ? 
O21 Tb2 2.410(6) . ? 
O21 H21A 0.8698 . ? 
O21 H21B 0.8689 . ? 
O22 Tb2 2.390(6) . ? 
O22 H22A 0.8689 . ? 
O22 H22B 0.8706 . ? 
O23 Tb2 2.404(6) . ? 
O23 H23A 0.8697 . ? 
O23 H23B 0.8702 . ? 
O24 Tb1 2.402(5) . ? 
O24 H24A 0.8558 . ? 
O24 H24B 0.8549 . ? 
O25 Tb1 2.360(6) . ? 
O25 H25A 0.8652 . ? 
O25 H25B 0.8661 . ? 
O26 Tb1 2.387(6) . ? 
O26 H26A 0.8739 . ? 
O26 H26B 0.8753 . ? 
O28 Cu1 2.545(8) . ? 
Cu1 O17 1.945(6) 4_665 ? 
Cu1 N6 2.000(7) 2_655 ? 
Cu1 N5 2.381(8) 2_655 ? 
Cu2 N4 2.018(7) 2 ? 
Cu2 N3 2.273(7) 2 ? 
Tb2 O3 2.326(5) 1_455 ? 
Tb2 O5 2.518(5) 1_455 ? 
Tb2 O6 2.533(6) 1_455 ? 
Tb2 C24 2.895(8) 1_455 ? 
 
loop_ 
 _geom_angle_atom_site_label_1 
 _geom_angle_atom_site_label_2 
 _geom_angle_atom_site_label_3 
 _geom_angle 
 _geom_angle_site_symmetry_1 
 _geom_angle_site_symmetry_3 
 _geom_angle_publ_flag 
O2 C1 O1 126.7(7) . . ? 
O2 C1 C2 116.9(7) . . ? 
O1 C1 C2 116.3(7) . . ? 
C3 C2 C6 118.0(8) . . ? 
C3 C2 C1 118.5(7) . . ? 
C6 C2 C1 123.2(7) . . ? 
C2 C3 C4 120.1(8) . . ? 
C2 C3 H3 120.0 . . ? 
C4 C3 H3 120.0 . . ? 
C5 C4 C3 119.5(8) . . ? 
C5 C4 H4 120.2 . . ? 
C3 C4 H4 120.2 . . ? 
N1 C5 C4 121.2(8) . . ? 
N1 C5 H5 119.4 . . ? 
C4 C5 H5 119.4 . . ? 
N1 C6 C2 121.1(7) . . ? 
N1 C6 C7 112.9(7) . . ? 
C2 C6 C7 125.8(7) . . ? 
N2 C7 C11 121.0(7) . . ? 
N2 C7 C6 112.6(7) . . ? 
C11 C7 C6 126.4(7) . . ? 
N2 C8 C9 120.6(8) . . ? 
N2 C8 H8 119.7 . . ? 
C9 C8 H8 119.7 . . ? 
C10 C9 C8 119.3(8) . . ? 
C10 C9 H9 120.4 . . ? 
C8 C9 H9 120.4 . . ? 
C9 C10 C11 119.9(8) . . ? 
C9 C10 H10 120.1 . . ? 
C11 C10 H10 120.1 . . ? 
C7 C11 C10 118.0(8) . . ? 
C7 C11 C12 123.5(7) . . ? 
C10 C11 C12 118.0(7) . . ? 
O4 C12 O3 126.4(8) . . ? 
O4 C12 C11 117.2(7) . . ? 
O3 C12 C11 116.2(7) . . ? 
O8 C13 O7 121.5(8) . . ? 
O8 C13 C14 117.1(8) . . ? 
O7 C13 C14 121.4(8) . . ? 
O8 C13 Tb1 55.8(4) . . ? 
O7 C13 Tb1 65.7(4) . . ? 
C14 C13 Tb1 171.6(6) . . ? 
C15 C14 C18 117.8(8) . . ? 
C15 C14 C13 117.2(8) . . ? 
C18 C14 C13 124.7(8) . . ? 
C14 C15 C16 120.7(8) . . ? 
C14 C15 H15 119.6 . . ? 
C16 C15 H15 119.6 . . ? 
C17 C16 C15 118.2(9) . . ? 
C17 C16 H16 120.9 . . ? 
C15 C16 H16 120.9 . . ? 
N6 C17 C16 121.8(8) . . ? 
N6 C17 H17 119.1 . . ? 
C16 C17 H17 119.1 . . ? 
N6 C18 C14 120.8(8) . . ? 
N6 C18 C19 113.4(7) . . ? 
C14 C18 C19 125.8(8) . . ? 
N5 C19 C23 121.6(7) . . ? 
N5 C19 C18 115.4(7) . . ? 
C23 C19 C18 122.7(7) . . ? 
N5 C20 C21 122.5(8) . . ? 
N5 C20 H20 118.8 . . ? 
C21 C20 H20 118.8 . . ? 
C22 C21 C20 118.2(8) . . ? 
C22 C21 H21 120.9 . . ? 
C20 C21 H21 120.9 . . ? 
C21 C22 C23 121.0(8) . . ? 
C21 C22 H22 119.5 . . ? 
C23 C22 H22 119.5 . . ? 
C19 C23 C22 117.5(8) . . ? 
C19 C23 C24 123.1(7) . . ? 
C22 C23 C24 119.0(7) . . ? 
O5 C24 O6 120.8(7) . . ? 
O5 C24 C23 120.2(7) . . ? 
O6 C24 C23 119.0(7) . . ? 
O5 C24 Tb2 60.2(4) . 1_655 ? 
O6 C24 Tb2 60.9(4) . 1_655 ? 
C23 C24 Tb2 172.4(6) . 1_655 ? 
O9 C25 O10 126.7(7) . . ? 
O9 C25 C26 116.5(7) . . ? 
O10 C25 C26 116.7(7) . . ? 
C27 C26 C30 119.0(7) . . ? 
C27 C26 C25 118.5(8) . . ? 
C30 C26 C25 122.5(7) . . ? 
C26 C27 C28 118.9(8) . . ? 
C26 C27 H27 120.5 . . ? 
C28 C27 H27 120.5 . . ? 
C29 C28 C27 119.7(8) . . ? 
C29 C28 H28 120.1 . . ? 
C27 C28 H28 120.1 . . ? 
N4 C29 C28 121.8(8) . . ? 
N4 C29 H29 119.1 . . ? 
C28 C29 H29 119.1 . . ? 
N4 C30 C26 121.6(8) . . ? 
N4 C30 C31 112.1(7) . . ? 
C26 C30 C31 126.2(7) . . ? 
N3 C31 C35 121.7(7) . . ? 
N3 C31 C30 114.1(7) . . ? 
C35 C31 C30 124.2(7) . . ? 
N3 C32 C33 126.3(9) . . ? 
N3 C32 H32 116.8 . . ? 
C33 C32 H32 116.8 . . ? 
C32 C33 C34 117.2(8) . . ? 
C32 C33 H33 121.4 . . ? 
C34 C33 H33 121.4 . . ? 
C33 C34 C35 119.9(8) . . ? 
C33 C34 H34 120.1 . . ? 
C35 C34 H34 120.1 . . ? 
C31 C35 C34 117.2(7) . . ? 
C31 C35 C36 123.4(7) . . ? 
C34 C35 C36 119.2(7) . . ? 
O12 C36 O11 125.7(8) . . ? 
O12 C36 C35 118.0(7) . . ? 
O11 C36 C35 116.3(7) . . ? 
O13 C37 O14 121.8(7) . . ? 
O13 C37 C38 120.8(7) . . ? 
O14 C37 C38 117.3(7) . . ? 
O13 C37 Tb1 60.8(4) . . ? 
O14 C37 Tb1 61.1(4) . . ? 
C38 C37 Tb1 175.6(5) . . ? 
C42 C38 C39 116.2(8) . . ? 
C42 C38 C37 122.2(7) . . ? 
C39 C38 C37 120.9(7) . . ? 
C40 C39 C38 120.4(8) . . ? 
C40 C39 H39 119.8 . . ? 
C38 C39 H39 119.8 . . ? 
C41 C40 C39 118.7(8) . . ? 
C41 C40 H40 120.6 . . ? 
C39 C40 H40 120.6 . . ? 
N8 C41 C40 121.4(8) . . ? 
N8 C41 H41 119.3 . . ? 
C40 C41 H41 119.3 . . ? 
N8 C42 C38 123.0(8) . . ? 
N8 C42 C43 114.6(7) . . ? 
C38 C42 C43 122.0(7) . . ? 
N7 C43 C47 121.5(8) . . ? 
N7 C43 C42 112.2(7) . . ? 
C47 C43 C42 126.3(8) . . ? 
N7 C44 C45 122.1(9) . . ? 
N7 C44 H44 118.9 . . ? 
C45 C44 H44 118.9 . . ? 
C46 C45 C44 117.5(8) . . ? 
C46 C45 H45 121.3 . . ? 
C44 C45 H45 121.3 . . ? 
C45 C46 C47 121.1(8) . . ? 
C45 C46 H46 119.5 . . ? 
C47 C46 H46 119.5 . . ? 
C43 C47 C46 117.2(8) . . ? 
C43 C47 C48 123.4(8) . . ? 
C46 C47 C48 119.1(7) . . ? 
O16 C48 O15 122.8(8) . . ? 
O16 C48 C47 121.3(7) . . ? 
O15 C48 C47 115.9(7) . . ? 
O16 C48 Tb2 68.7(4) . . ? 
O15 C48 Tb2 54.1(4) . . ? 
C47 C48 Tb2 170.0(6) . . ? 
O18 C49 O17 128.5(8) . . ? 
O18 C49 C50 116.9(8) . . ? 
O17 C49 C50 114.0(8) . . ? 
C51 C50 C54 119.1(9) . . ? 
C51 C50 C49 118.6(9) . . ? 
C54 C50 C49 122.0(8) . . ? 
C50 C51 C52 121.3(10) . . ? 
C50 C51 H51 119.4 . . ? 
C52 C51 H51 119.4 . . ? 
C53 C52 C51 116.9(9) . . ? 
C53 C52 H52 121.6 . . ? 
C51 C52 H52 121.6 . . ? 
N9 C53 C52 122.6(9) . . ? 
N9 C53 H53 118.7 . . ? 
C52 C53 H53 118.7 . . ? 
N9 C54 C50 120.4(8) . . ? 
N9 C54 C55 113.3(8) . . ? 
C50 C54 C55 126.0(8) . . ? 
C58 C57 C56 123.5(13) . . ? 
C58 C57 H57 118.3 . . ? 
C56 C57 H57 118.3 . . ? 
C59 C58 C57 116.9(15) . . ? 
C59 C58 H58 121.5 . . ? 
C57 C58 H58 121.5 . . ? 
C58 C59 N10 122.9(16) . . ? 
C58 C59 H59 118.5 . . ? 
N10 C59 H59 118.5 . . ? 
C56 C62 C61 120.0 . . ? 
C56 C62 H62 120.0 . . ? 
C61 C62 H62 120.0 . . ? 
C55 C56 C62 120.0 . . ? 
C55 C56 C57 114.2(10) . . ? 
C62 C56 C57 19.9(13) . . ? 
C55 C56 C63 125.2(10) . . ? 
C62 C56 C63 110.4(10) . . ? 
C57 C56 C63 120.4(10) . . ? 
N10 C55 C56 121.9(11) . . ? 
N10 C55 N11 15.4(15) . . ? 
C56 C55 N11 120.0 . . ? 
N10 C55 C54 110.4(9) . . ? 
C56 C55 C54 127.6(9) . . ? 
N11 C55 C54 111.2(9) . . ? 
C60 N11 C55 120.0 . . ? 
C60 N11 Cu2 111.9(10) . . ? 
C55 N11 Cu2 98.1(10) . . ? 
N11 C60 C61 120.0 . . ? 
N11 C60 H60 120.0 . . ? 
C61 C60 H60 120.0 . . ? 
C60 C61 C62 120.0 . . ? 
C60 C61 H61 120.0 . . ? 
C62 C61 H61 120.0 . . ? 
O19 C63 O20 127.8(13) . . ? 
O19 C63 C56 116.0(11) . . ? 
O20 C63 C56 116.2(11) . . ? 
C5 N1 C6 119.9(7) . . ? 
C5 N1 Cu1 123.7(6) . . ? 
C6 N1 Cu1 114.9(5) . . ? 
C8 N2 C7 120.3(7) . . ? 
C8 N2 Cu1 123.1(6) . . ? 
C7 N2 Cu1 111.9(5) . . ? 
C32 N3 C31 117.5(8) . . ? 
C32 N3 Cu2 124.7(6) . 2_545 ? 
C31 N3 Cu2 104.9(5) . 2_545 ? 
C29 N4 C30 118.8(7) . . ? 
C29 N4 Cu2 120.9(5) . 2_545 ? 
C30 N4 Cu2 117.9(6) . 2_545 ? 
C20 N5 C19 118.9(8) . . ? 
C20 N5 Cu1 127.7(6) . 2_645 ? 
C19 N5 Cu1 104.1(5) . 2_645 ? 
C17 N6 C18 120.1(8) . . ? 
C17 N6 Cu1 118.4(6) . 2_645 ? 
C18 N6 Cu1 117.3(6) . 2_645 ? 
C44 N7 C43 119.2(8) . . ? 
C44 N7 Cu2 126.8(6) . . ? 
C43 N7 Cu2 111.2(5) . . ? 
C42 N8 C41 119.3(7) . . ? 
C42 N8 Cu2 110.0(5) . . ? 
C41 N8 Cu2 126.5(6) . . ? 
C54 N9 C53 119.6(8) . . ? 
C54 N9 Cu2 121.3(6) . . ? 
C53 N9 Cu2 118.2(6) . . ? 
C59 N10 C55 120.4(13) . . ? 
C12 O3 Tb2 149.1(6) . 1_655 ? 
C12 O4 Tb1 164.0(6) . . ? 
C24 O5 Tb2 93.8(4) . 1_655 ? 
C24 O6 Tb2 92.9(5) . 1_655 ? 
C13 O7 Tb1 88.4(5) . . ? 
C13 O8 Tb1 99.0(5) . . ? 
C36 O11 Tb1 143.0(5) . . ? 
C36 O12 Tb2 162.3(6) . . ? 
C37 O13 Tb1 93.6(5) . . ? 
C37 O14 Tb1 93.2(5) . . ? 
C48 O15 Tb2 100.7(5) . . ? 
C48 O16 Tb2 86.2(5) . . ? 
C49 O17 Cu1 124.5(6) . 4_466 ? 
Tb2 O21 H21A 110.5 . . ? 
Tb2 O21 H21B 110.3 . . ? 
H21A O21 H21B 108.5 . . ? 
Tb2 O22 H22A 110.5 . . ? 
Tb2 O22 H22B 110.5 . . ? 
H22A O22 H22B 108.4 . . ? 
Tb2 O23 H23A 110.5 . . ? 
Tb2 O23 H23B 110.4 . . ? 
H23A O23 H23B 108.5 . . ? 
Tb1 O24 H24A 109.8 . . ? 
Tb1 O24 H24B 109.8 . . ? 
H24A O24 H24B 109.2 . . ? 
Tb1 O25 H25A 110.4 . . ? 
Tb1 O25 H25B 110.3 . . ? 
H25A O25 H25B 108.6 . . ? 
Tb1 O26 H26A 110.8 . . ? 
Tb1 O26 H26B 110.8 . . ? 
H26A O26 H26B 108.2 . . ? 
O17 Cu1 N1 91.2(3) 4_665 . ? 
O17 Cu1 N6 89.5(3) 4_665 2_655 ? 
N1 Cu1 N6 179.2(3) . 2_655 ? 
O17 Cu1 N2 171.0(3) 4_665 . ? 
N1 Cu1 N2 80.5(3) . . ? 
N6 Cu1 N2 98.7(3) 2_655 . ? 
O17 Cu1 N5 104.7(2) 4_665 2_655 ? 
N1 Cu1 N5 102.6(3) . 2_655 ? 
N6 Cu1 N5 77.5(3) 2_655 2_655 ? 
N2 Cu1 N5 80.7(3) . 2_655 ? 
O17 Cu1 O28 92.9(3) 4_665 . ? 
N1 Cu1 O28 86.4(3) . . ? 
N6 Cu1 O28 93.2(3) 2_655 . ? 
N2 Cu1 O28 83.1(3) . . ? 
N5 Cu1 O28 159.8(3) 2_655 . ? 
N9 Cu2 N7 92.2(3) . . ? 
N9 Cu2 N4 88.2(3) . 2 ? 
N7 Cu2 N4 174.9(3) . 2 ? 
N9 Cu2 N8 165.9(3) . . ? 
N7 Cu2 N8 81.9(3) . . ? 
N4 Cu2 N8 98.8(3) 2 . ? 
N9 Cu2 N3 105.9(3) . 2 ? 
N7 Cu2 N3 98.1(3) . 2 ? 
N4 Cu2 N3 77.0(3) 2 2 ? 
N8 Cu2 N3 87.7(3) . 2 ? 
N9 Cu2 N11 74.2(4) . . ? 
N7 Cu2 N11 91.8(4) . . ? 
N4 Cu2 N11 93.2(4) 2 . ? 
N8 Cu2 N11 93.0(4) . . ? 
N3 Cu2 N11 170.2(4) 2 . ? 
O4 Tb1 O11 143.0(2) . . ? 
O4 Tb1 O25 140.0(2) . . ? 
O11 Tb1 O25 77.0(2) . . ? 
O4 Tb1 O26 72.55(19) . . ? 
O11 Tb1 O26 79.0(2) . . ? 
O25 Tb1 O26 135.85(19) . . ? 
O4 Tb1 O24 76.4(2) . . ? 
O11 Tb1 O24 74.89(19) . . ? 
O25 Tb1 O24 128.7(2) . . ? 
O26 Tb1 O24 78.25(19) . . ? 
O4 Tb1 O8 70.6(2) . . ? 
O11 Tb1 O8 134.12(19) . . ? 
O25 Tb1 O8 76.4(2) . . ? 
O26 Tb1 O8 143.17(19) . . ? 
O24 Tb1 O8 94.1(2) . . ? 
O4 Tb1 O13 107.49(19) . . ? 
O11 Tb1 O13 82.44(19) . . ? 
O25 Tb1 O13 72.6(2) . . ? 
O26 Tb1 O13 67.9(2) . . ? 
O24 Tb1 O13 142.24(19) . . ? 
O8 Tb1 O13 123.1(2) . . ? 
O4 Tb1 O14 73.20(19) . . ? 
O11 Tb1 O14 132.10(18) . . ? 
O25 Tb1 O14 77.5(2) . . ? 
O26 Tb1 O14 92.33(19) . . ? 
O24 Tb1 O14 149.62(18) . . ? 
O8 Tb1 O14 76.21(18) . . ? 
O13 Tb1 O14 51.34(18) . . ? 
O4 Tb1 O7 105.12(18) . . ? 
O11 Tb1 O7 84.46(18) . . ? 
O25 Tb1 O7 68.60(18) . . ? 
O26 Tb1 O7 144.20(18) . . ? 
O24 Tb1 O7 66.80(18) . . ? 
O8 Tb1 O7 51.10(18) . . ? 
O13 Tb1 O7 140.87(18) . . ? 
O14 Tb1 O7 121.81(18) . . ? 
O4 Tb1 C13 87.9(2) . . ? 
O11 Tb1 C13 109.6(2) . . ? 
O25 Tb1 C13 70.1(2) . . ? 
O26 Tb1 C13 153.8(2) . . ? 
O24 Tb1 C13 80.3(2) . . ? 
O8 Tb1 C13 25.2(2) . . ? 
O13 Tb1 C13 136.4(2) . . ? 
O14 Tb1 C13 98.7(2) . . ? 
O7 Tb1 C13 25.9(2) . . ? 
O4 Tb1 C37 90.0(2) . . ? 
O11 Tb1 C37 107.5(2) . . ? 
O25 Tb1 C37 73.9(2) . . ? 
O26 Tb1 C37 78.8(2) . . ? 
O24 Tb1 C37 156.0(2) . . ? 
O8 Tb1 C37 100.1(2) . . ? 
O13 Tb1 C37 25.6(2) . . ? 
O14 Tb1 C37 25.7(2) . . ? 
O7 Tb1 C37 136.7(2) . . ? 
C13 Tb1 C37 119.4(2) . . ? 
O3 Tb2 O12 143.1(2) 1_455 . ? 
O3 Tb2 O22 78.9(2) 1_455 . ? 
O12 Tb2 O22 73.2(2) . . ? 
O3 Tb2 O23 76.8(2) 1_455 . ? 
O12 Tb2 O23 139.8(2) . . ? 
O22 Tb2 O23 136.97(19) . . ? 
O3 Tb2 O15 136.0(2) 1_455 . ? 
O12 Tb2 O15 69.1(2) . . ? 
O22 Tb2 O15 142.2(2) . . ? 
O23 Tb2 O15 75.9(2) . . ? 
O3 Tb2 O21 74.57(19) 1_455 . ? 
O12 Tb2 O21 76.4(2) . . ? 
O22 Tb2 O21 77.9(2) . . ? 
O23 Tb2 O21 127.41(19) . . ? 
O15 Tb2 O21 95.9(2) . . ? 
O3 Tb2 O5 80.15(19) 1_455 1_455 ? 
O12 Tb2 O5 110.34(19) . 1_455 ? 
O22 Tb2 O5 68.35(19) . 1_455 ? 
O23 Tb2 O5 72.86(19) . 1_455 ? 
O15 Tb2 O5 122.65(19) . 1_455 ? 
O21 Tb2 O5 141.04(19) . 1_455 ? 
O3 Tb2 O6 130.48(19) 1_455 1_455 ? 
O12 Tb2 O6 75.28(19) . 1_455 ? 
O22 Tb2 O6 92.9(2) . 1_455 ? 
O23 Tb2 O6 77.1(2) . 1_455 ? 
O15 Tb2 O6 74.84(19) . 1_455 ? 
O21 Tb2 O6 151.63(18) . 1_455 ? 
O5 Tb2 O6 52.11(18) 1_455 1_455 ? 
O3 Tb2 O16 87.34(19) 1_455 . ? 
O12 Tb2 O16 102.29(19) . . ? 
O22 Tb2 O16 145.5(2) . . ? 
O23 Tb2 O16 67.54(18) . . ? 
O15 Tb2 O16 50.33(18) . . ? 
O21 Tb2 O16 67.95(19) . . ? 
O5 Tb2 O16 140.22(18) 1_455 . ? 
O6 Tb2 O16 119.49(19) 1_455 . ? 
O3 Tb2 C24 105.8(2) 1_455 1_455 ? 
O12 Tb2 C24 91.8(2) . 1_455 ? 
O22 Tb2 C24 78.3(2) . 1_455 ? 
O23 Tb2 C24 74.9(2) . 1_455 ? 
O15 Tb2 C24 99.6(2) . 1_455 ? 
O21 Tb2 C24 155.7(2) . 1_455 ? 
O5 Tb2 C24 26.0(2) 1_455 1_455 ? 
O6 Tb2 C24 26.2(2) 1_455 1_455 ? 
O16 Tb2 C24 136.1(2) . 1_455 ? 
O3 Tb2 C48 111.9(2) 1_455 . ? 
O12 Tb2 C48 85.1(2) . . ? 
O22 Tb2 C48 152.6(2) . . ? 
O23 Tb2 C48 70.2(2) . . ? 
O15 Tb2 C48 25.2(2) . . ? 
O21 Tb2 C48 80.9(2) . . ? 
O5 Tb2 C48 136.8(2) 1_455 . ? 
O6 Tb2 C48 97.6(2) 1_455 . ? 
O16 Tb2 C48 25.1(2) . . ? 
C24 Tb2 C48 119.8(2) 1_455 . ? 
#===END

  
data_10-DyCu3 
_audit_creation_date              2014-08-23
_audit_creation_method
;
Olex2 1.2
(compiled 2014.03.20 svn.r2914 for OlexSys, GUI svn.r4816)
;
_publ_contact_author_address      ?
_publ_contact_author_email        ?
_publ_contact_author_name         ''
_publ_contact_author_phone        ?
_publ_section_references
;
Dolomanov, O.V., Bourhis, L.J., Gildea, R.J, Howard, J.A.K. & Puschmann, H.
 (2009), J. Appl. Cryst. 42, 339-341.

Sheldrick, G.M. (2008). Acta Cryst. A64, 112-122.
; 
_chemical_name_common             ? 
_chemical_melting_point           ? 
_chemical_formula_moiety          'C48 H36 Cu3 Dy1 N9 O25' 
_chemical_formula_sum 
 'C48 H36 Cu3 Dy N9 O25' 
_chemical_formula_weight          1492.01 
 
loop_ 
 _atom_type_symbol 
 _atom_type_description 
 _atom_type_scat_dispersion_real 
 _atom_type_scat_dispersion_imag 
 _atom_type_scat_source 
 'C'  'C'   0.0033   0.0016 
 'International Tables Vol C Tables 4.2.6.8 and 6.1.1.4' 
 'H'  'H'   0.0000   0.0000 
 'International Tables Vol C Tables 4.2.6.8 and 6.1.1.4' 
 'Cu'  'Cu'   0.3201   1.2651 
 'International Tables Vol C Tables 4.2.6.8 and 6.1.1.4' 
 'Dy'  'Dy'  -0.1892   4.4098 
 'International Tables Vol C Tables 4.2.6.8 and 6.1.1.4' 
 'N'  'N'   0.0061   0.0033 
 'International Tables Vol C Tables 4.2.6.8 and 6.1.1.4' 
 'O'  'O'   0.0106   0.0060 
 'International Tables Vol C Tables 4.2.6.8 and 6.1.1.4' 
 
_symmetry_cell_setting            'triclinic' 
_space_group_name_H-M_alt    'P-1' 
_space_group_name_Hall                '-p 1' 
 
loop_ 
 _symmetry_equiv_pos_as_xyz 
 'x, y, z' 
 '-x, -y, -z' 
 
_cell_length_a                    12.1832(9) 
_cell_length_b                    14.8529(9) 
_cell_length_c                    15.1970(9) 
_cell_angle_alpha                 92.957(5) 
_cell_angle_beta                  105.125(6) 
_cell_angle_gamma                 110.694(6) 
_cell_volume                      2451.8(3) 
_cell_formula_units_Z             2 
_cell_measurement_temperature     124.60(10) 
_cell_measurement_reflns_used     ? 
_cell_measurement_theta_min       2.5408 
_cell_measurement_theta_max       29.0222 
_exptl_absorpt_coefficient_mu     2.896
_exptl_absorpt_correction_T_min   0.714 
_exptl_absorpt_correction_T_max   0.749
_exptl_absorpt_correction_type    multi-scan
_exptl_absorpt_process_details    
;
CrysAlisPro, Agilent Technologies,
Version 1.171.35.19 (release 27-10-2011 CrysAlis171 .NET)
(compiled Oct 27 2011,15:02:11)
Empirical absorption correction using spherical harmonics,
 implemented in SCALE3 ABSPACK scaling algorithm.
; 
_exptl_crystal_description        block 
_exptl_crystal_colour             green 
_exptl_crystal_size_max           0.20 
_exptl_crystal_size_mid           0.10 
_exptl_crystal_size_min           0.10 
_exptl_crystal_density_meas       ? 
_exptl_crystal_density_diffrn     2.021 
_exptl_crystal_density_method     'not measured' 
_exptl_crystal_F_000              1480 
_exptl_special_details 
; 
 ? 
; 
_diffrn_reflns_number             16645
_diffrn_reflns_theta_full         25.01
_diffrn_ambient_temperature       124.60(10)
_diffrn_detector_area_resol_mean  ? 
_diffrn_measured_fraction_theta_max    0.981
_diffrn_measured_fraction_theta_full   0.981
_diffrn_reflns_av_R_equivalents   0.0653
_diffrn_reflns_av_sigmaI/netI     0.1007
_diffrn_reflns_limit_h_min        -9 
_diffrn_reflns_limit_h_max        14 
_diffrn_reflns_limit_k_min        -17 
_diffrn_reflns_limit_k_max        14 
_diffrn_reflns_limit_l_min        -17 
_diffrn_reflns_limit_l_max        18
_diffrn_reflns_theta_min          2.55 
_diffrn_reflns_theta_max          25.00
_diffrn_orient_matrix_UB_11       0.0312144000
_diffrn_orient_matrix_UB_12       0.0087082000
_diffrn_orient_matrix_UB_13      -0.0340063000
_diffrn_orient_matrix_UB_21      -0.0449928000
_diffrn_orient_matrix_UB_22       0.0156992000
_diffrn_orient_matrix_UB_23      -0.0266574000
_diffrn_orient_matrix_UB_31       0.0354199000
_diffrn_orient_matrix_UB_32       0.0484909000
_diffrn_orient_matrix_UB_33       0.0230513000
_diffrn_measurement_details
;
#__ type_ start__ end____ width___ exp.time_
  1 omega  -23.00   92.00   1.0000    7.5000
omega____ theta____ kappa____ phi______ frames
    -       18.7135   19.0000 -150.0000 115

#__ type_ start__ end____ width___ exp.time_
  2 omega   -4.00   61.00   1.0000    7.5000
omega____ theta____ kappa____ phi______ frames
    -       18.7135  -99.0000  -30.0000 65

#__ type_ start__ end____ width___ exp.time_
  3 omega    4.00   91.00   1.0000    7.5000
omega____ theta____ kappa____ phi______ frames
    -       18.7135   37.0000   90.0000 87

#__ type_ start__ end____ width___ exp.time_
  4 omega  -90.00  -34.00   1.0000    7.5000
omega____ theta____ kappa____ phi______ frames
    -      -19.2604  179.0000  150.0000 56

#__ type_ start__ end____ width___ exp.time_
  5 omega  -33.00    1.00   1.0000    7.5000
omega____ theta____ kappa____ phi______ frames
    -      -19.2604  -84.0000   82.0000 34

#__ type_ start__ end____ width___ exp.time_
  6 omega  -37.00   12.00   1.0000    7.5000
omega____ theta____ kappa____ phi______ frames
    -      -19.2604  -84.0000  158.0000 49

;
_reflns_odcompleteness_completeness		99.91
_reflns_odcompleteness_theta		26.32
_reflns_odcompleteness_iscentric		1

_diffrn_measurement_device_type   'SuperNova, Single source at offset), Eos'
_diffrn_measurement_method        '\w scans'

_diffrn_radiation_wavelength      0.71073 
_diffrn_radiation_type            MoK\a 
_diffrn_radiation_source          'SuperNova (Mo) X-ray Source' 
_diffrn_radiation_monochromator   mirror 


_diffrn_standards_number          ? 
_diffrn_standards_interval_count  ? 
_diffrn_standards_interval_time   ? 
_diffrn_standards_decay_%         ? 
_reflns_number_total              8472 
_reflns_number_gt                 7098 
_reflns_threshold_expression      >2sigma(I) 
_computing_cell_refinement
;
CrysAlisPro, Agilent Technologies,
Version 1.171.35.19 (release 27-10-2011 CrysAlis171 .NET)
(compiled Oct 27 2011,15:02:11)
;
_computing_data_collection
;
CrysAlisPro, Agilent Technologies,
Version 1.171.35.19 (release 27-10-2011 CrysAlis171 .NET)
(compiled Oct 27 2011,15:02:11)
;
_computing_data_reduction
;
CrysAlisPro, Agilent Technologies,
Version 1.171.35.19 (release 27-10-2011 CrysAlis171 .NET)
(compiled Oct 27 2011,15:02:11)
;
_computing_molecular_graphics     'Olex2 (Dolomanov et al., 2009)'
_computing_publication_material   'Olex2 (Dolomanov et al., 2009)'
_computing_structure_refinement   'XL (Sheldrick, 2008)'
_computing_structure_solution     'XS (Sheldrick, 2008)'
 
_refine_diff_density_max    9.404 
_refine_diff_density_min   -2.169 
_refine_diff_density_rms    0.355  
_refine_ls_extinction_method      none 
_refine_ls_extinction_coef        ?  
_refine_ls_goodness_of_fit_ref    1.078 
_refine_ls_hydrogen_treatment     mixed 
_refine_ls_matrix_type            full 
_refine_ls_number_reflns          8472
_refine_ls_number_parameters      769 
_refine_ls_number_restraints      223
_refine_ls_R_factor_all           0.1268 
_refine_ls_R_factor_gt            0.1136
_refine_ls_restrained_S_all       1.025 
_refine_ls_shift/su_max           0.019 
_refine_ls_shift/su_mean          0.000
_refine_ls_structure_factor_coef  Fsqd  
_refine_ls_weighting_scheme       calc  
_refine_ls_weighting_details 
 'calc w=1/[\s^2^(Fo^2^)+(0.0605P)^2^+242.3737P] where P=(Fo^2^+2Fc^2^)/3'  
_refine_ls_wR_factor_ref          0.2825 
_refine_ls_wR_factor_gt           0.2738 

_refine_special_details 
; 
 Refinement of F^2^ against ALL reflections.  The weighted R-factor wR and 
 goodness of fit S are based on F^2^, conventional R-factors R are based 
 on F, with F set to zero for negative F^2^. The threshold expression of 
 F^2^ > 2sigma(F^2^) is used only for calculating R-factors(gt) etc. and is 
 not relevant to the choice of reflections for refinement.  R-factors based 
 on F^2^ are statistically about twice as large as those based on F, and R- 
 factors based on ALL data will be even larger. 
; 
_olex2_refinement_description
;
1. Fixed Uiso
 At 1.2 times of:
  All C(H) groups
 At 1.5 times of:
  All O(H,H) groups
2. Uiso/Uaniso restraints and constraints
Uains(C32) \\sim Ueq: with sigma of 0.001 and sigma for terminal atoms of 0.002
Uains(N2) \\sim Ueq: with sigma of 0.001 and sigma for terminal atoms of 0.002
Uains(C7) \\sim Ueq: with sigma of 0.001 and sigma for terminal atoms of 0.002
Uains(C19) \\sim Ueq: with sigma of 0.001 and sigma for terminal atoms of 0.002
Uains(C26) \\sim Ueq: with sigma of 0.005 and sigma for terminal atoms of 0.01
Uains(C2) \\sim Ueq: with sigma of 0.005 and sigma for terminal atoms of 0.01
Uains(C45) \\sim Ueq: with sigma of 0.005 and sigma for terminal atoms of 0.01
Uains(C14) \\sim Ueq: with sigma of 0.005 and sigma for terminal atoms of 0.01
Uains(C17) \\sim Ueq: with sigma of 0.005 and sigma for terminal atoms of 0.01
Uains(N3) \\sim Ueq: with sigma of 0.005 and sigma for terminal atoms of 0.01
Uains(O7) \\sim Ueq: with sigma of 0.005 and sigma for terminal atoms of 0.01
Uains(O15) \\sim Ueq: with sigma of 0.005 and sigma for terminal atoms of 0.01
Uains(N4) \\sim Ueq: with sigma of 0.005 and sigma for terminal atoms of 0.01
Uains(C31) \\sim Ueq: with sigma of 0.005 and sigma for terminal atoms of 0.01
Uains(N5) \\sim Ueq: with sigma of 0.005 and sigma for terminal atoms of 0.01
Uains(N7) \\sim Ueq: with sigma of 0.005 and sigma for terminal atoms of 0.01
Uains(O1) \\sim Ueq: with sigma of 0.005 and sigma for terminal atoms of 0.01
Uains(O10) \\sim Ueq: with sigma of 0.005 and sigma for terminal atoms of 0.01
Uains(C25) \\sim Ueq: with sigma of 0.005 and sigma for terminal atoms of 0.01
Uains(O14) \\sim Ueq: with sigma of 0.005 and sigma for terminal atoms of 0.01
Uains(C18) \\sim Ueq: with sigma of 0.005 and sigma for terminal atoms of 0.01
Uains(C1) \\sim Ueq: with sigma of 0.005 and sigma for terminal atoms of 0.01
Uains(C28) \\sim Ueq: with sigma of 0.005 and sigma for terminal atoms of 0.01
Uains(C40) \\sim Ueq: with sigma of 0.005 and sigma for terminal atoms of 0.01
Uains(C12) \\sim Ueq: with sigma of 0.005 and sigma for terminal atoms of 0.01
Uains(C22) \\sim Ueq: with sigma of 0.005 and sigma for terminal atoms of 0.01
Uains(C27) \\sim Ueq: with sigma of 0.005 and sigma for terminal atoms of 0.01
Uains(C46) \\sim Ueq: with sigma of 0.005 and sigma for terminal atoms of 0.01
Uains(C4) \\sim Ueq: with sigma of 0.005 and sigma for terminal atoms of 0.01
Uains(C16) \\sim Ueq: with sigma of 0.005 and sigma for terminal atoms of 0.01
Uains(C21) \\sim Ueq: with sigma of 0.005 and sigma for terminal atoms of 0.01
Uains(C31) \\sim Ueq: with sigma of 0.005 and sigma for terminal atoms of 0.01
Uains(C48) \\sim Ueq: with sigma of 0.005 and sigma for terminal atoms of 0.01
Uains(O3) \\sim Ueq: with sigma of 0.005 and sigma for terminal atoms of 0.01
Uains(O9) \\sim Ueq: with sigma of 0.005 and sigma for terminal atoms of 0.01
Uains(C33) \\sim Ueq: with sigma of 0.005 and sigma for terminal atoms of 0.01
3.a Rotating group:
 O9(H9a,H9b), O10(H10a,H10b),O11(H11a,H11b), O12(H12a,H12b), O22(H22a,H22b)
3.b Aromatic/amide H refined with riding coordinates:
 C3(H3), C4(H4), C5(H5), C8(H8), C9(H9), C10(H10), C15(H15), C16(H16),
 C17(H17), C20(H20), C21(H21), C22(H22), C27(H27), C28(H28), C29(H29), 
C32(H32), C33(H33), C34(H34), C39(H39), C40(H40), C41(H41), C44(H44), 
C45(H45), C46(H46)
; 

_atom_sites_solution_primary      direct 
_atom_sites_solution_secondary    difmap 
_atom_sites_solution_hydrogens    geom 
  
loop_ 
 _atom_site_label 
 _atom_site_type_symbol 
 _atom_site_fract_x 
 _atom_site_fract_y 
 _atom_site_fract_z 
 _atom_site_U_iso_or_equiv 
 _atom_site_adp_type 
 _atom_site_occupancy 
 _atom_site_symmetry_multiplicity 
 _atom_site_calc_flag 
 _atom_site_refinement_flags 
 _atom_site_disorder_assembly 
 _atom_site_disorder_group 
C1 C 0.1437(14) 1.1598(11) 0.6190(11) 0.008(3) Uani 1 1 d U . . 
C2 C 0.1738(15) 1.0689(12) 0.6362(12) 0.014(3) Uani 1 1 d U . . 
C3 C 0.1704(16) 1.0338(13) 0.7196(13) 0.020(4) Uani 1 1 d . . . 
H3 H 0.1652 1.0718 0.7678 0.024 Uiso 1 1 calc R . . 
C4 C 0.1745(18) 0.9426(14) 0.7311(14) 0.023(4) Uani 1 1 d U . . 
H4 H 0.1787 0.9208 0.7877 0.027 Uiso 1 1 calc R . . 
C5 C 0.1723(17) 0.8859(14) 0.6554(12) 0.019(4) Uani 1 1 d . . . 
H5 H 0.1670 0.8223 0.6598 0.023 Uiso 1 1 calc R . . 
C6 C 0.1843(15) 1.0115(12) 0.5658(11) 0.012(3) Uani 1 1 d . . . 
C7 C 0.2031(13) 1.0390(11) 0.4776(10) 0.006(3) Uani 1 1 d U . . 
C8 C 0.1645(17) 0.9729(14) 0.3238(12) 0.020(4) Uani 1 1 d . . . 
H8 H 0.1294 0.9190 0.2773 0.024 Uiso 1 1 calc RD . . 
C9 C 0.2267(17) 1.0630(13) 0.3045(13) 0.019(4) Uani 1 1 d . . . 
H9 H 0.2338 1.0703 0.2455 0.023 Uiso 1 1 calc R . . 
C10 C 0.2791(17) 1.1434(14) 0.3748(13) 0.020(4) Uani 1 1 d . . . 
H10 H 0.3213 1.2049 0.3629 0.024 Uiso 1 1 calc R . . 
C11 C 0.2684(16) 1.1315(13) 0.4606(13) 0.020(4) Uani 1 1 d . . . 
C12 C 0.3386(16) 1.2219(13) 0.5325(12) 0.018(4) Uani 1 1 d U . . 
C13 C 0.3576(15) 0.7918(12) 0.4671(12) 0.013(3) Uani 1 1 d . . . 
C14 C 0.3906(15) 0.8165(12) 0.5718(11) 0.010(3) Uani 1 1 d U . . 
C15 C 0.4478(18) 0.9159(13) 0.6075(12) 0.019(4) Uani 1 1 d . . . 
H15 H 0.4596 0.9618 0.5680 0.023 Uiso 1 1 calc R . . 
C16 C 0.4866(16) 0.9456(13) 0.7017(12) 0.018(4) Uani 1 1 d U . . 
H16 H 0.5247 1.0114 0.7266 0.021 Uiso 1 1 calc R . . 
C17 C 0.4674(16) 0.8748(13) 0.7587(12) 0.016(4) Uani 1 1 d U . . 
H17 H 0.4956 0.8950 0.8223 0.019 Uiso 1 1 calc R . . 
C18 C 0.3702(14) 0.7503(12) 0.6331(11) 0.010(3) Uani 1 1 d U . . 
C19 C 0.3057(14) 0.6415(11) 0.6071(11) 0.007(3) Uani 1 1 d U . . 
C20 C 0.3121(16) 0.4932(13) 0.6407(12) 0.015(4) Uani 1 1 d . . . 
H20 H 0.3497 0.4595 0.6797 0.019 Uiso 1 1 calc R . . 
C21 C 0.2189(15) 0.4419(12) 0.5632(11) 0.013(3) Uani 1 1 d U . . 
H21 H 0.1939 0.3746 0.5492 0.015 Uiso 1 1 calc R . . 
C22 C 0.1632(15) 0.4913(12) 0.5068(11) 0.013(3) Uani 1 1 d U . . 
H22 H 0.0992 0.4578 0.4536 0.016 Uiso 1 1 calc R . . 
C23 C 0.2021(14) 0.5932(11) 0.5288(11) 0.009(3) Uani 1 1 d . . . 
C24 C 0.1288(14) 0.6449(12) 0.4697(11) 0.011(3) Uani 1 1 d . . . 
C25 C 0.3374(15) 0.8513(12) 1.0331(11) 0.012(3) Uani 1 1 d U . . 
C26 C 0.4400(14) 0.8289(12) 1.0121(11) 0.010(3) Uani 1 1 d U . . 
C27 C 0.5617(15) 0.9001(12) 1.0470(11) 0.013(3) Uani 1 1 d U . . 
H27 H 0.5779 0.9533 1.0903 0.015 Uiso 1 1 calc R . . 
C28 C 0.6537(15) 0.8918(12) 1.0182(12) 0.014(3) Uani 1 1 d U . . 
H28 H 0.7335 0.9380 1.0413 0.017 Uiso 1 1 calc R . . 
C29 C 0.6248(15) 0.8106(12) 0.9520(12) 0.013(3) Uani 1 1 d . . . 
H29 H 0.6861 0.8059 0.9284 0.016 Uiso 1 1 calc R . . 
C30 C 0.4231(14) 0.7452(13) 0.9565(12) 0.013(3) Uani 1 1 d . . . 
C31 C 0.3084(14) 0.6538(11) 0.9229(11) 0.007(3) Uani 1 1 d U . . 
C32 C 0.2013(15) 0.5273(12) 0.7986(12) 0.012(3) Uani 1 1 d U . . 
H32 H 0.1973 0.4951 0.7431 0.014 Uiso 1 1 calc R . . 
C33 C 0.1060(17) 0.4875(14) 0.8407(13) 0.021(4) Uani 1 1 d U . . 
H33 H 0.0346 0.4343 0.8097 0.025 Uiso 1 1 calc R . . 
C34 C 0.1230(15) 0.5302(13) 0.9286(12) 0.016(4) Uani 1 1 d . . . 
H34 H 0.0657 0.5020 0.9593 0.020 Uiso 1 1 calc R . . 
C35 C 0.2239(16) 0.6144(12) 0.9716(11) 0.013(3) Uani 1 1 d . . . 
C36 C 0.2374(15) 0.6524(12) 1.0697(11) 0.012(3) Uani 1 1 d . . . 
C37 C -0.3964(17) 0.5203(13) 0.8582(12) 0.018(4) Uani 1 1 d . . . 
C41 C -0.1210(8) 0.7280(7) 1.0895(5) 0.016(4) Uani 1 1 d G . . 
H41 H -0.0614 0.7704 1.1409 0.019 Uiso 1 1 calc R . . 
N8 N -0.0965(7) 0.7243(6) 1.0053(6) 0.011(3) Uani 1 1 d GU . . 
C42 C -0.1855(9) 0.6609(7) 0.9283(5) 0.010(3) Uani 1 1 d G . . 
C38 C -0.2989(8) 0.6012(7) 0.9356(6) 0.013(3) Uani 1 1 d G . . 
C39 C -0.3233(7) 0.6048(7) 1.0198(7) 0.018(4) Uani 1 1 d G . . 
H39 H -0.3992 0.5649 1.0247 0.021 Uiso 1 1 calc R . . 
C40 C -0.2344(10) 0.6682(8) 1.0967(6) 0.020(4) Uani 1 1 d GU . . 
H40 H -0.2507 0.6707 1.1531 0.024 Uiso 1 1 calc R . . 
C43 C -0.1445(14) 0.6737(11) 0.8460(12) 0.011(3) Uani 1 1 d . . . 
C44 C 0.0276(16) 0.7042(13) 0.7952(12) 0.018(4) Uani 1 1 d . . . 
H44 H 0.1117 0.7194 0.8096 0.021 Uiso 1 1 calc R . . 
C45 C -0.0405(16) 0.6862(13) 0.7031(12) 0.016(4) Uani 1 1 d U . . 
H45 H -0.0038 0.6861 0.6565 0.019 Uiso 1 1 calc R . . 
C46 C -0.1651(16) 0.6682(13) 0.6823(13) 0.019(4) Uani 1 1 d U . . 
H46 H -0.2129 0.6596 0.6215 0.023 Uiso 1 1 calc R . . 
C47 C -0.2183(15) 0.6631(11) 0.7563(12) 0.012(3) Uani 1 1 d . . . 
C48 C -0.3515(15) 0.6524(12) 0.7272(11) 0.010(3) Uani 1 1 d U . . 
N1 N 0.1776(13) 0.9195(10) 0.5752(9) 0.012(3) Uani 1 1 d . . . 
N2 N 0.1539(12) 0.9616(10) 0.4065(9) 0.011(3) Uani 1 1 d U . . 
N3 N 0.4108(13) 0.7797(10) 0.7269(10) 0.014(3) Uani 1 1 d U . . 
N4 N 0.3519(12) 0.5899(10) 0.6630(9) 0.010(3) Uani 1 1 d U . . 
N5 N 0.5141(12) 0.7408(9) 0.9220(9) 0.007(3) Uani 1 1 d U . . 
N6 N 0.2946(12) 0.6094(10) 0.8385(9) 0.012(3) Uani 1 1 d . . . 
N7 N -0.0213(13) 0.7010(10) 0.8636(10) 0.013(3) Uani 1 1 d U . . 
N9 N -0.0092(14) 0.9506(12) 0.8989(10) 0.021(4) Uani 1 1 d . . . 
O1 O 0.1809(10) 1.2243(9) 0.6921(8) 0.017(3) Uani 1 1 d U . . 
O2 O 0.0805(11) 1.1625(9) 0.5431(8) 0.017(3) Uani 1 1 d . . . 
O3 O 0.4011(12) 1.2091(10) 0.6086(9) 0.023(3) Uani 1 1 d U . . 
O4 O 0.3341(13) 1.2981(9) 0.5087(10) 0.027(3) Uani 1 1 d . . . 
O5 O 0.3777(10) 0.7205(8) 0.4346(8) 0.014(3) Uani 1 1 d . . . 
O6 O 0.3096(12) 0.8431(9) 0.4216(8) 0.021(3) Uani 1 1 d . . . 
O7 O 0.1240(10) 0.7181(8) 0.5097(7) 0.010(2) Uani 1 1 d U . . 
O8 O 0.0758(10) 0.6067(8) 0.3860(7) 0.012(2) Uani 1 1 d . . . 
O9 O 0.4452(14) 0.5704(10) 0.3921(9) 0.028(3) Uani 1 1 d U . . 
H9A H 0.3958 0.5619 0.4278 0.043 Uiso 1 1 d R . . 
H9B H 0.5220 0.5935 0.4294 0.043 Uiso 1 1 d R . . 
O10 O 0.2017(11) 0.5925(10) 0.2611(9) 0.022(3) Uani 1 1 d U . . 
H10A H 0.1604 0.6184 0.2211 0.033 Uiso 1 1 d R . . 
H10B H 0.1821 0.5963 0.3124 0.033 Uiso 1 1 d R . . 
O11 O 0.5777(11) 0.6847(10) 0.2293(8) 0.020(3) Uani 1 1 d . . . 
H11A H 0.5712 0.6268 0.2076 0.029 Uiso 1 1 d R . . 
H11B H 0.6482 0.7121 0.2722 0.029 Uiso 1 1 d R . . 
O14 O 0.3421(10) 0.6814(8) 1.1266(8) 0.013(2) Uani 1 1 d U . . 
O15 O 0.1405(11) 0.6447(10) 1.0882(9) 0.024(3) Uani 1 1 d U . . 
O16 O 0.2303(11) 0.8059(9) 0.9746(8) 0.017(3) Uani 1 1 d . . . 
O17 O 0.3613(11) 0.9101(9) 1.1037(9) 0.020(3) Uani 1 1 d . . . 
O18 O -0.3568(11) 0.4826(8) 0.8034(8) 0.015(3) Uani 1 1 d . . . 
O19 O -0.5036(11) 0.5008(9) 0.8569(8) 0.017(3) Uani 1 1 d . . . 
O20 O -0.3845(10) 0.6902(8) 0.7899(8) 0.013(2) Uani 1 1 d . . . 
O21 O -0.4176(11) 0.6132(9) 0.6494(8) 0.019(3) Uani 1 1 d . . . 
O22 O 0.1355(11) 0.8732(9) 1.1073(8) 0.020(3) Uani 1 1 d . . . 
H22A H 0.1013 0.9174 1.1072 0.029 Uiso 1 1 d R . . 
H22B H 0.2164 0.9064 1.1211 0.029 Uiso 1 1 d R . . 
O23 O 0.0722(12) 0.9163(9) 0.9115(10) 0.025(3) Uani 1 1 d . . . 
O24 O 0.0132(12) 1.0348(9) 0.8758(9) 0.023(3) Uani 1 1 d . . . 
O25 O -0.1101(12) 0.9068(12) 0.9122(10) 0.031(3) Uani 1 1 d . . . 
Cu1 Cu 0.06863(18) 0.78372(15) 0.98951(14) 0.0127(5) Uani 1 1 d . . . 
Cu2 Cu 0.44770(17) 0.65786(14) 0.79494(13) 0.0092(4) Uani 1 1 d . . . 
Cu3 Cu 0.11745(18) 0.83349(14) 0.45203(13) 0.0109(4) Uani 1 1 d . . . 
Dy1 Dy 0.41647(7) 0.67430(6) 0.28934(5) 0.0102(2) Uani 1 1 d . . . 
O12 O 0.3666(16) 0.8132(11) 0.2715(10) 0.037(4) Uani 1 1 d . . . 
H12A H 0.3056 0.8035 0.2200 0.055 Uiso 1 1 d R . . 
H12B H 0.3427 0.8293 0.3186 0.055 Uiso 1 1 d R . . 
O13 O 0.0275(10) 0.7562(8) 0.3270(7) 0.012(2) Uani 1 1 d . . . 
H13A H -0.0045 0.6914 0.3284 0.018 Uiso 1 1 d R . . 
H13B H 0.0754 0.7637 0.2894 0.018 Uiso 1 1 d RD . . 
 
loop_ 
 _atom_site_aniso_label 
 _atom_site_aniso_U_11 
 _atom_site_aniso_U_22 
 _atom_site_aniso_U_33 
 _atom_site_aniso_U_23 
 _atom_site_aniso_U_13 
 _atom_site_aniso_U_12 
C1 0.006(5) 0.009(5) 0.008(5) -0.001(4) 0.005(4) 0.000(4) 
C2 0.012(5) 0.015(5) 0.014(5) -0.003(4) 0.004(4) 0.004(4) 
C3 0.014(9) 0.020(9) 0.025(10) -0.008(8) 0.011(8) 0.004(8) 
C4 0.025(6) 0.023(6) 0.022(6) 0.005(4) 0.011(4) 0.006(4) 
C5 0.029(10) 0.020(9) 0.009(8) -0.001(7) -0.002(7) 0.015(8) 
C6 0.013(8) 0.011(8) 0.013(8) 0.000(7) -0.001(7) 0.007(7) 
C7 0.006(3) 0.006(3) 0.006(3) 0.0007(11) 0.0016(13) 0.0027(15) 
C8 0.024(10) 0.030(10) 0.007(8) 0.009(8) 0.004(7) 0.011(9) 
C9 0.023(10) 0.013(9) 0.021(10) 0.008(8) 0.010(8) 0.005(8) 
C10 0.022(10) 0.023(10) 0.019(9) 0.014(8) 0.013(8) 0.008(8) 
C11 0.014(9) 0.015(9) 0.025(10) -0.009(8) 0.008(8) -0.001(7) 
C12 0.015(5) 0.020(6) 0.017(5) 0.002(4) 0.009(4) 0.001(4) 
C13 0.016(8) 0.008(8) 0.013(8) -0.004(7) 0.002(7) 0.004(7) 
C14 0.011(5) 0.012(5) 0.008(5) 0.001(4) 0.005(4) 0.003(4) 
C15 0.032(11) 0.017(9) 0.010(8) -0.001(7) 0.011(8) 0.009(8) 
C16 0.018(5) 0.016(5) 0.020(6) 0.000(4) 0.002(4) 0.011(4) 
C17 0.014(5) 0.017(5) 0.014(5) 0.000(4) 0.002(4) 0.006(4) 
C18 0.009(5) 0.012(5) 0.010(5) 0.001(4) 0.005(4) 0.004(4) 
C19 0.007(3) 0.007(3) 0.007(3) 0.0010(11) 0.0024(13) 0.0026(15) 
C20 0.016(9) 0.023(9) 0.012(8) -0.001(7) 0.006(7) 0.012(8) 
C21 0.012(5) 0.011(5) 0.013(5) -0.001(4) 0.006(4) 0.001(4) 
C22 0.015(5) 0.012(5) 0.009(5) 0.000(4) 0.002(4) 0.001(4) 
C23 0.010(8) 0.010(8) 0.010(8) 0.005(7) 0.003(6) 0.008(7) 
C24 0.004(7) 0.011(8) 0.012(8) 0.002(7) 0.002(6) -0.002(6) 
C25 0.011(5) 0.012(5) 0.014(5) 0.000(4) 0.005(4) 0.005(4) 
C26 0.007(5) 0.014(5) 0.011(5) 0.003(4) 0.006(4) 0.004(4) 
C27 0.014(5) 0.012(5) 0.009(5) 0.000(4) 0.003(4) 0.001(4) 
C28 0.010(5) 0.014(5) 0.016(5) 0.002(4) 0.001(4) 0.003(4) 
C29 0.014(8) 0.012(8) 0.016(9) -0.001(7) 0.008(7) 0.004(7) 
C30 0.005(8) 0.020(9) 0.016(9) 0.007(7) 0.001(6) 0.007(7) 
C31 0.005(4) 0.008(4) 0.007(4) -0.001(3) 0.004(3) 0.000(3) 
C32 0.012(3) 0.012(3) 0.011(3) 0.0018(11) 0.0037(14) 0.0040(16) 
C33 0.019(5) 0.020(6) 0.020(6) 0.001(4) 0.005(4) 0.005(4) 
C34 0.007(8) 0.018(9) 0.016(9) -0.001(7) 0.002(7) -0.002(7) 
C35 0.019(9) 0.009(8) 0.008(8) 0.000(7) 0.006(7) -0.001(7) 
C36 0.008(8) 0.010(8) 0.011(8) 0.000(7) 0.002(6) -0.002(7) 
C37 0.021(10) 0.018(9) 0.015(9) -0.002(7) 0.012(7) 0.004(8) 
C41 0.019(9) 0.011(8) 0.011(8) -0.002(7) 0.003(7) -0.002(7) 
N8 0.011(3) 0.011(3) 0.011(3) 0.0017(11) 0.0035(13) 0.0040(14) 
C42 0.018(9) 0.007(8) 0.011(8) 0.004(6) 0.007(7) 0.009(7) 
C38 0.012(8) 0.012(8) 0.013(8) 0.006(7) 0.000(7) 0.004(7) 
C39 0.021(9) 0.009(8) 0.023(10) 0.004(7) 0.013(8) 0.001(7) 
C40 0.021(5) 0.021(6) 0.015(5) 0.004(4) 0.009(4) 0.003(4) 
C43 0.008(8) 0.006(7) 0.018(9) 0.001(7) 0.008(7) 0.001(6) 
C44 0.013(9) 0.025(10) 0.016(9) -0.004(8) 0.006(7) 0.009(8) 
C45 0.016(5) 0.018(5) 0.013(5) 0.000(4) 0.008(4) 0.004(4) 
C46 0.017(5) 0.022(6) 0.018(6) -0.003(4) 0.006(4) 0.009(4) 
C47 0.010(8) 0.005(7) 0.014(8) -0.002(7) -0.005(7) 0.002(7) 
C48 0.012(5) 0.011(5) 0.010(5) 0.003(4) 0.006(4) 0.003(4) 
N1 0.015(7) 0.016(7) 0.008(7) 0.002(6) 0.008(6) 0.006(6) 
N2 0.011(3) 0.011(3) 0.011(3) 0.0016(11) 0.0034(13) 0.0040(14) 
N3 0.016(5) 0.016(5) 0.010(5) 0.001(4) 0.005(4) 0.004(4) 
N4 0.008(4) 0.013(5) 0.009(5) -0.001(4) 0.004(4) 0.004(4) 
N5 0.006(4) 0.008(4) 0.005(4) -0.001(4) -0.001(3) 0.002(4) 
N6 0.007(7) 0.016(7) 0.008(7) -0.007(6) -0.001(5) 0.002(6) 
N7 0.010(5) 0.012(5) 0.014(5) -0.004(4) 0.002(4) 0.004(4) 
N9 0.017(8) 0.028(9) 0.011(7) -0.008(7) 0.008(6) -0.001(7) 
O1 0.008(5) 0.016(5) 0.020(6) -0.011(5) 0.000(4) 0.002(4) 
O2 0.013(6) 0.018(6) 0.017(6) 0.003(5) -0.001(5) 0.005(5) 
O3 0.022(5) 0.025(5) 0.019(5) -0.001(4) 0.009(4) 0.002(4) 
O4 0.038(8) 0.010(6) 0.033(8) 0.006(6) 0.018(7) 0.003(6) 
O5 0.011(6) 0.015(6) 0.013(6) -0.005(5) 0.002(5) 0.004(5) 
O6 0.031(7) 0.017(6) 0.015(6) 0.003(5) 0.002(6) 0.012(6) 
O7 0.012(4) 0.010(4) 0.007(4) -0.001(3) 0.000(3) 0.004(3) 
O8 0.016(6) 0.015(6) 0.006(5) -0.001(5) 0.003(5) 0.006(5) 
O9 0.033(6) 0.025(6) 0.018(6) -0.009(5) -0.006(5) 0.011(5) 
O10 0.010(5) 0.034(6) 0.020(6) -0.002(5) 0.005(4) 0.007(5) 
O11 0.008(6) 0.030(7) 0.017(6) -0.010(6) 0.000(5) 0.007(6) 
O14 0.011(4) 0.013(4) 0.011(4) 0.001(3) 0.004(3) 0.000(3) 
O15 0.013(5) 0.041(7) 0.017(6) -0.003(5) 0.008(5) 0.007(5) 
O16 0.014(6) 0.018(6) 0.018(6) 0.000(5) 0.004(5) 0.008(5) 
O17 0.012(6) 0.023(7) 0.020(7) -0.005(6) 0.002(5) 0.004(5) 
O18 0.020(6) 0.011(6) 0.012(6) -0.006(5) 0.008(5) 0.000(5) 
O19 0.013(6) 0.024(7) 0.013(6) 0.007(5) 0.009(5) 0.003(5) 
O20 0.009(6) 0.017(6) 0.008(6) 0.004(5) 0.002(5) -0.003(5) 
O21 0.009(6) 0.028(7) 0.015(6) -0.007(5) -0.005(5) 0.009(5) 
O22 0.009(6) 0.029(7) 0.014(6) -0.008(6) -0.001(5) 0.003(5) 
O23 0.020(7) 0.019(7) 0.040(8) 0.005(6) 0.007(6) 0.013(6) 
O24 0.025(7) 0.018(7) 0.024(7) 0.006(6) 0.007(6) 0.008(6) 
O25 0.019(7) 0.054(10) 0.028(8) 0.013(7) 0.014(6) 0.016(7) 
Cu1 0.0097(10) 0.0166(10) 0.0094(10) -0.0031(8) 0.0023(8) 0.0034(8) 
Cu2 0.0053(9) 0.0121(10) 0.0080(9) -0.0021(8) 0.0010(7) 0.0018(8) 
Cu3 0.0138(10) 0.0108(10) 0.0065(9) -0.0007(8) 0.0012(8) 0.0046(8) 
Dy1 0.0067(4) 0.0108(4) 0.0097(4) -0.0035(3) 0.0016(3) 0.0005(3) 
O12 0.069(11) 0.035(9) 0.019(7) 0.009(7) 0.013(8) 0.034(8) 
O13 0.011(6) 0.014(6) 0.008(5) -0.004(5) 0.003(5) 0.002(5) 
 
_geom_special_details 
; 
 All esds (except the esd in the dihedral angle between two l.s. planes) 
 are estimated using the full covariance matrix.  The cell esds are taken 
 into account individually in the estimation of esds in distances, angles 
 and torsion angles; correlations between esds in cell parameters are only 
 used when they are defined by crystal symmetry.  An approximate (isotropic) 
 treatment of cell esds is used for estimating esds involving l.s. planes. 
; 
 
loop_ 
 _geom_bond_atom_site_label_1 
 _geom_bond_atom_site_label_2 
 _geom_bond_distance 
 _geom_bond_site_symmetry_2 
 _geom_bond_publ_flag 
C1 O2 1.22(2) . ? 
C1 O1 1.296(19) . ? 
C1 C2 1.54(2) . ? 
C2 C6 1.39(2) . ? 
C2 C3 1.40(3) . ? 
C3 C4 1.39(3) . ? 
C4 C5 1.38(3) . ? 
C5 N1 1.35(2) . ? 
C6 N1 1.36(2) . ? 
C6 C7 1.47(2) . ? 
C7 N2 1.38(2) . ? 
C7 C11 1.40(2) . ? 
C8 N2 1.31(2) . ? 
C8 C9 1.37(3) . ? 
C9 C10 1.40(3) . ? 
C10 C11 1.36(3) . ? 
C11 C12 1.51(2) . ? 
C12 O4 1.22(2) . ? 
C12 O3 1.27(2) . ? 
C13 O6 1.25(2) . ? 
C13 O5 1.272(19) . ? 
C13 C14 1.53(2) . ? 
C14 C18 1.39(2) . ? 
C14 C15 1.40(2) . ? 
C15 C16 1.38(2) . ? 
C16 C17 1.39(3) . ? 
C17 N3 1.33(2) . ? 
C18 N3 1.37(2) . ? 
C18 C19 1.50(2) . ? 
C19 N4 1.32(2) . ? 
C19 C23 1.42(2) . ? 
C20 N4 1.34(2) . ? 
C20 C21 1.36(2) . ? 
C21 C22 1.36(2) . ? 
C22 C23 1.41(2) . ? 
C23 C24 1.53(2) . ? 
C24 O7 1.24(2) . ? 
C24 O8 1.263(19) . ? 
C25 O17 1.25(2) . ? 
C25 O16 1.29(2) . ? 
C25 C26 1.51(2) . ? 
C26 C30 1.39(2) . ? 
C26 C27 1.42(2) . ? 
C27 C28 1.35(2) . ? 
C28 C29 1.41(2) . ? 
C29 N5 1.32(2) . ? 
C30 N5 1.36(2) . ? 
C30 C31 1.51(2) . ? 
C31 N6 1.35(2) . ? 
C31 C35 1.40(2) . ? 
C32 N6 1.32(2) . ? 
C32 C33 1.43(2) . ? 
C33 C34 1.38(2) . ? 
C34 C35 1.38(2) . ? 
C35 C36 1.51(2) . ? 
C36 O14 1.25(2) . ? 
C36 O15 1.25(2) . ? 
C37 O19 1.23(2) . ? 
C37 O18 1.26(2) . ? 
C37 C38 1.535(19) . ? 
C41 N8 1.3900 . ? 
C41 C40 1.3900 . ? 
N8 C42 1.3900 . ? 
N8 Cu1 1.975(7) . ? 
C42 C38 1.3900 . ? 
C42 C43 1.462(18) . ? 
C38 C39 1.3900 . ? 
C39 C40 1.3900 . ? 
C43 N7 1.36(2) . ? 
C43 C47 1.39(2) . ? 
C44 N7 1.32(2) . ? 
C44 C45 1.38(2) . ? 
C45 C46 1.39(2) . ? 
C46 C47 1.43(2) . ? 
C47 C48 1.51(2) . ? 
C48 O21 1.22(2) . ? 
C48 O20 1.300(19) . ? 
N1 Cu3 2.012(13) . ? 
N2 Cu3 1.999(14) . ? 
N3 Cu2 2.253(15) . ? 
N4 Cu2 2.034(13) . ? 
N5 Cu2 2.034(12) . ? 
N6 Cu2 2.044(14) . ? 
N7 Cu1 2.021(14) . ? 
N9 O23 1.25(2) . ? 
N9 O25 1.25(2) . ? 
N9 O24 1.27(2) . ? 
O3 Dy1 2.355(13) 2_676 ? 
O5 Dy1 2.487(11) . ? 
O7 Cu3 1.982(11) . ? 
O9 Dy1 2.300(14) . ? 
O10 Dy1 2.371(12) . ? 
O11 Dy1 2.334(11) . ? 
O14 Dy1 2.424(11) 1_556 ? 
O16 Cu1 1.955(12) . ? 
O18 Dy1 2.423(11) 2_566 ? 
O20 Cu2 1.951(11) 1_455 ? 
O22 Cu1 1.966(11) . ? 
O23 Cu1 2.343(14) . ? 
Cu2 O20 1.951(11) 1_655 ? 
Cu3 O13 1.982(11) . ? 
Dy1 O3 2.355(13) 2_676 ? 
Dy1 O12 2.357(14) . ? 
Dy1 O18 2.423(11) 2_566 ? 
Dy1 O14 2.424(11) 1_554 ? 
 
loop_ 
 _geom_angle_atom_site_label_1 
 _geom_angle_atom_site_label_2 
 _geom_angle_atom_site_label_3 
 _geom_angle 
 _geom_angle_site_symmetry_1 
 _geom_angle_site_symmetry_3 
 _geom_angle_publ_flag 
O2 C1 O1 125.7(15) . . ? 
O2 C1 C2 119.7(14) . . ? 
O1 C1 C2 114.3(14) . . ? 
C6 C2 C3 118.6(16) . . ? 
C6 C2 C1 121.5(15) . . ? 
C3 C2 C1 119.0(14) . . ? 
C4 C3 C2 120.6(16) . . ? 
C5 C4 C3 117.5(18) . . ? 
N1 C5 C4 122.2(17) . . ? 
N1 C6 C2 119.8(16) . . ? 
N1 C6 C7 113.0(13) . . ? 
C2 C6 C7 127.2(15) . . ? 
N2 C7 C11 118.4(14) . . ? 
N2 C7 C6 113.9(13) . . ? 
C11 C7 C6 127.6(14) . . ? 
N2 C8 C9 121.2(17) . . ? 
C8 C9 C10 118.9(17) . . ? 
C11 C10 C9 119.8(17) . . ? 
C10 C11 C7 119.8(16) . . ? 
C10 C11 C12 114.7(17) . . ? 
C7 C11 C12 125.3(17) . . ? 
O4 C12 O3 128.4(18) . . ? 
O4 C12 C11 116.4(17) . . ? 
O3 C12 C11 115.0(17) . . ? 
O6 C13 O5 126.4(16) . . ? 
O6 C13 C14 115.5(14) . . ? 
O5 C13 C14 118.0(15) . . ? 
C18 C14 C15 118.4(15) . . ? 
C18 C14 C13 126.4(15) . . ? 
C15 C14 C13 115.2(15) . . ? 
C16 C15 C14 119.6(17) . . ? 
C15 C16 C17 118.6(17) . . ? 
N3 C17 C16 123.3(16) . . ? 
N3 C18 C14 121.8(15) . . ? 
N3 C18 C19 112.3(14) . . ? 
C14 C18 C19 125.9(14) . . ? 
N4 C19 C23 119.8(14) . . ? 
N4 C19 C18 115.5(13) . . ? 
C23 C19 C18 124.7(14) . . ? 
N4 C20 C21 122.9(17) . . ? 
C22 C21 C20 118.4(16) . . ? 
C21 C22 C23 120.2(15) . . ? 
C22 C23 C19 117.5(14) . . ? 
C22 C23 C24 118.7(14) . . ? 
C19 C23 C24 123.7(14) . . ? 
O7 C24 O8 126.9(15) . . ? 
O7 C24 C23 116.7(14) . . ? 
O8 C24 C23 116.3(14) . . ? 
O17 C25 O16 125.8(15) . . ? 
O17 C25 C26 119.1(15) . . ? 
O16 C25 C26 115.1(14) . . ? 
C30 C26 C27 117.4(14) . . ? 
C30 C26 C25 124.3(15) . . ? 
C27 C26 C25 118.3(14) . . ? 
C28 C27 C26 121.0(15) . . ? 
C27 C28 C29 117.6(16) . . ? 
N5 C29 C28 122.6(15) . . ? 
N5 C30 C26 120.5(15) . . ? 
N5 C30 C31 112.1(14) . . ? 
C26 C30 C31 127.3(15) . . ? 
N6 C31 C35 121.5(14) . . ? 
N6 C31 C30 112.5(14) . . ? 
C35 C31 C30 126.0(14) . . ? 
N6 C32 C33 120.1(15) . . ? 
C34 C33 C32 118.1(17) . . ? 
C33 C34 C35 121.1(17) . . ? 
C34 C35 C31 117.4(15) . . ? 
C34 C35 C36 116.9(15) . . ? 
C31 C35 C36 125.6(14) . . ? 
O14 C36 O15 125.6(15) . . ? 
O14 C36 C35 117.5(14) . . ? 
O15 C36 C35 116.7(14) . . ? 
O19 C37 O18 128.0(16) . . ? 
O19 C37 C38 115.8(13) . . ? 
O18 C37 C38 116.2(14) . . ? 
N8 C41 C40 120.0 . . ? 
C42 N8 C41 120.0 . . ? 
C42 N8 Cu1 114.5(5) . . ? 
C41 N8 Cu1 124.4(5) . . ? 
N8 C42 C38 120.0 . . ? 
N8 C42 C43 111.1(9) . . ? 
C38 C42 C43 128.7(9) . . ? 
C39 C38 C42 120.0 . . ? 
C39 C38 C37 115.9(9) . . ? 
C42 C38 C37 123.6(9) . . ? 
C40 C39 C38 120.0 . . ? 
C39 C40 C41 120.0 . . ? 
N7 C43 C47 119.9(15) . . ? 
N7 C43 C42 113.7(14) . . ? 
C47 C43 C42 126.3(14) . . ? 
N7 C44 C45 123.2(16) . . ? 
C44 C45 C46 118.0(16) . . ? 
C45 C46 C47 118.8(16) . . ? 
C43 C47 C46 118.9(15) . . ? 
C43 C47 C48 126.5(15) . . ? 
C46 C47 C48 114.5(14) . . ? 
O21 C48 O20 125.2(15) . . ? 
O21 C48 C47 120.1(14) . . ? 
O20 C48 C47 114.7(14) . . ? 
C5 N1 C6 120.7(14) . . ? 
C5 N1 Cu3 124.1(12) . . ? 
C6 N1 Cu3 111.7(11) . . ? 
C8 N2 C7 121.8(15) . . ? 
C8 N2 Cu3 123.2(12) . . ? 
C7 N2 Cu3 112.2(10) . . ? 
C17 N3 C18 118.2(15) . . ? 
C17 N3 Cu2 126.9(12) . . ? 
C18 N3 Cu2 108.1(10) . . ? 
C19 N4 C20 120.6(14) . . ? 
C19 N4 Cu2 116.1(10) . . ? 
C20 N4 Cu2 121.2(12) . . ? 
C29 N5 C30 119.9(14) . . ? 
C29 N5 Cu2 122.8(11) . . ? 
C30 N5 Cu2 112.7(10) . . ? 
C32 N6 C31 121.3(14) . . ? 
C32 N6 Cu2 122.0(11) . . ? 
C31 N6 Cu2 114.8(10) . . ? 
C44 N7 C43 120.6(15) . . ? 
C44 N7 Cu1 124.0(12) . . ? 
C43 N7 Cu1 110.6(11) . . ? 
O23 N9 O25 122.0(17) . . ? 
O23 N9 O24 119.0(15) . . ? 
O25 N9 O24 119.0(16) . . ? 
C12 O3 Dy1 126.3(12) . 2_676 ? 
C13 O5 Dy1 135.0(11) . . ? 
C24 O7 Cu3 124.5(11) . . ? 
C36 O14 Dy1 133.4(11) . 1_556 ? 
C25 O16 Cu1 128.9(10) . . ? 
C37 O18 Dy1 137.6(11) . 2_566 ? 
C48 O20 Cu2 126.3(10) . 1_455 ? 
N9 O23 Cu1 123.6(12) . . ? 
O16 Cu1 O22 94.0(5) . . ? 
O16 Cu1 N8 164.2(5) . . ? 
O22 Cu1 N8 93.4(4) . . ? 
O16 Cu1 N7 93.1(5) . . ? 
O22 Cu1 N7 170.7(5) . . ? 
N8 Cu1 N7 81.3(5) . . ? 
O16 Cu1 O23 86.4(5) . . ? 
O22 Cu1 O23 89.1(5) . . ? 
N8 Cu1 O23 107.6(4) . . ? 
N7 Cu1 O23 85.3(5) . . ? 
O20 Cu2 N5 89.8(5) 1_655 . ? 
O20 Cu2 N4 100.1(5) 1_655 . ? 
N5 Cu2 N4 166.5(5) . . ? 
O20 Cu2 N6 161.5(5) 1_655 . ? 
N5 Cu2 N6 79.9(5) . . ? 
N4 Cu2 N6 92.7(5) . . ? 
O20 Cu2 N3 98.2(5) 1_655 . ? 
N5 Cu2 N3 91.6(5) . . ? 
N4 Cu2 N3 78.1(5) . . ? 
N6 Cu2 N3 97.4(5) . . ? 
O13 Cu3 O7 93.5(5) . . ? 
O13 Cu3 N2 93.9(5) . . ? 
O7 Cu3 N2 166.5(5) . . ? 
O13 Cu3 N1 167.9(5) . . ? 
O7 Cu3 N1 92.6(5) . . ? 
N2 Cu3 N1 82.2(6) . . ? 
O9 Dy1 O11 97.8(5) . . ? 
O9 Dy1 O3 85.1(5) . 2_676 ? 
O11 Dy1 O3 72.0(4) . 2_676 ? 
O9 Dy1 O12 142.9(5) . . ? 
O11 Dy1 O12 110.6(5) . . ? 
O3 Dy1 O12 81.5(5) 2_676 . ? 
O9 Dy1 O10 88.1(5) . . ? 
O11 Dy1 O10 142.8(4) . . ? 
O3 Dy1 O10 145.2(4) 2_676 . ? 
O12 Dy1 O10 83.6(5) . . ? 
O9 Dy1 O18 74.0(4) . 2_566 ? 
O11 Dy1 O18 73.5(4) . 2_566 ? 
O3 Dy1 O18 136.5(4) 2_676 2_566 ? 
O12 Dy1 O18 136.0(5) . 2_566 ? 
O10 Dy1 O18 72.9(4) . 2_566 ? 
O9 Dy1 O14 143.1(4) . 1_554 ? 
O11 Dy1 O14 74.1(4) . 1_554 ? 
O3 Dy1 O14 123.9(4) 2_676 1_554 ? 
O12 Dy1 O14 70.3(4) . 1_554 ? 
O10 Dy1 O14 79.3(4) . 1_554 ? 
O18 Dy1 O14 69.2(4) 2_566 1_554 ? 
O9 Dy1 O5 69.6(4) . . ? 
O11 Dy1 O5 141.1(4) . . ? 
O3 Dy1 O5 70.3(4) 2_676 . ? 
O12 Dy1 O5 73.2(4) . . ? 
O10 Dy1 O5 75.3(4) . . ? 
O18 Dy1 O5 131.8(4) 2_566 . ? 
O14 Dy1 O5 137.3(4) 1_554 . ? 
#===END 
